**A compositional letter code in high-level visual cortex  
explains how we read jumbled words**

Aakash Agrawal<sup>1</sup>, K.V.S. Hari<sup>2</sup> & S. P. Arun<sup>3\*</sup>

<sup>1</sup>Centre for BioSystems Science & Engineering, <sup>2</sup>Department of Electrical

Communication Engineering & <sup>3</sup>Centre for Neuroscience

Indian Institute of Science, Bangalore, 560012, India

\*Correspondence to: S. P. Arun ([sparun@iisc.ac.in](mailto:sparun@iisc.ac.in))

1  
2  
3  
4  
5  
6  
7  
8  
9  
10  
11  
12  
13

## ABSTRACT

We read words and even jumbled words effortlessly, but the neural representations underlying this remarkable ability remain unknown. We hypothesized that word processing is driven by a visual representation that is compositional i.e. with string responses systematically related to letters. To test this hypothesis, we devised a model in which neurons tuned to letter shape respond to longer strings by linearly summing letter responses. This letter model explained human performance in both visual search as well as word reading tasks. Brain imaging revealed that viewing a string activates this compositional letter code in the lateral occipital (LO) region, and that subsequent comparisons to known words are computed by the visual word form area (VWFA). Thus, seeing a word activates a compositional letter code that enables efficient reading.

14

## INTRODUCTION

15           Reading is a recent cultural invention, yet we are remarkably efficient at reading  
16 words and even jumbled words (Figure 1A). What makes a jumbled word easy or hard  
17 to read? This question has captured the popular imagination through demonstrations  
18 such as the Cambridge University effect (Rawlinson, 1976; Grainger and Whitney,  
19 2004), depicted in Figure 1A. Reading a word or a jumbled word can be influenced by  
20 a variety of factors (Norris, 2013; Grainger, 2018). Word reading is easy when similar  
21 shapes are substituted (Perea et al., 2008; Perea and Panadero, 2014), when the first  
22 and last letters are preserved (Rayner et al., 2006), when there are fewer  
23 transpositions (Gomez et al., 2008) and when word shape is preserved (Norris, 2013;  
24 Grainger, 2018). Word reading is also easier for words with frequent bigrams or  
25 trigrams, for frequent words and for shuffled words that preserve intermediate units  
26 such as consonant clusters or morphemes (Norris, 2013; Grainger, 2018). Despite  
27 these insights, it is not clear how these factors combine, what their distinct  
28 contributions are, and more generally, how word representations relate to letter  
29 representations.

30           Here, we hypothesized that word reading is enabled by a purely visual  
31 representation. To probe purely visual processing, we devised a visual search task in  
32 which subjects had to find an oddball target among distractors. This task does not  
33 require any explicit reading and is driven by shape representations in visual cortex  
34 (Sripati and Olson, 2010a; Zhivago and Arun, 2014). An example visual search array  
35 containing two oddball targets is shown in Figure 1B. It can be seen that finding  
36 OFRGET is easy among FORGET whereas finding FOGRET is hard (Figure 1B). This  
37 difference in visual similarity (Figure 1C) explains why transposing the middle letters  
38 renders a word easier to read than transposing its edge letters. This example suggests

39 that word reading could be explained by purely visual processing as indexed by visual  
40 search. However, subjects may have been reading during visual search, thereby  
41 activating non-visual lexical or linguistic factors.

42 To overcome this confound, we asked whether visual search involving letter  
43 strings can be explained using a neurally plausible model containing only visual  
44 factors. We drew upon two well-established principles of object representations in  
45 high-level visual cortex. First, images that are perceptually similar elicit similar activity  
46 in single neurons (Op de Beeck et al., 2001; Sripathi and Olson, 2010a; Zhivago and  
47 Arun, 2014). Accordingly we used visual search for single letters to create artificial  
48 neurons tuned for single letters. Second, the neural response to multiple objects is an  
49 average of the response to the individual objects, a phenomenon known as divisive  
50 normalization (Zoccolan et al., 2005; Ghose and Maunsell, 2008; Zhivago and Arun,  
51 2014). Accordingly, we created neural responses to letter strings as a linear sum of  
52 single letter responses. In contrast to an influential proposal that requires neurons  
53 tuned to letter combinations (Dehaene et al., 2005, 2010), our model only assumes  
54 neurons tuned for letter shape and retinal position, as observed in high-level visual  
55 cortex (Lehky and Tanaka, 2016). It does not capture any information about  
56 specialized detectors for longer strings, or about other lexical or linguistic factors. We  
57 used this model to explain human performance on visual search as well as word  
58 recognition tasks. Finally, using brain imaging, we identified the neural substrates for  
59 both the letter code as well as subsequent lexical decisions.

60

61

62

A

AOCCDRNIG TO A RSESEARCH AT CMABRIGDE UINERV TISY, IT DEOSN'T MTTAER IN WAHT OREDR THE LTTEERS IN A WROD ARE, THE OLN YIPRMOETNT TIHNG IS TAHT THE FRIST AND LSAT LTTEER BE AT THE RGHIT PCLAE. THE RSET CAN BE A TOATL MSES AND YOU CAN SITLL RAED IT WOUTHIT A PORBELM. TIHS IS BCUSEAE THE HUAMN MNID DEOS NOT RAED ERVEY LTETER BY ISTLEF, BUT THE WROD AS A WLOHE.

B

Example Search array

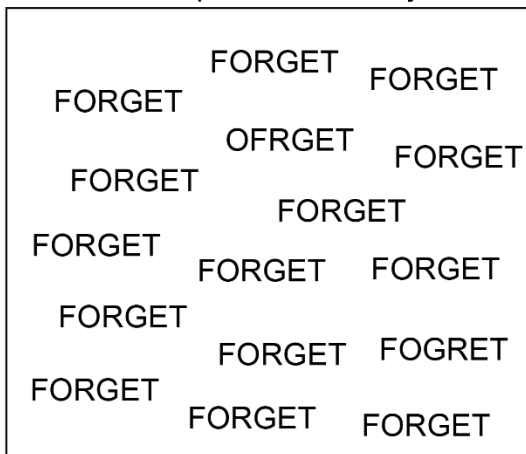

C

Visual search space

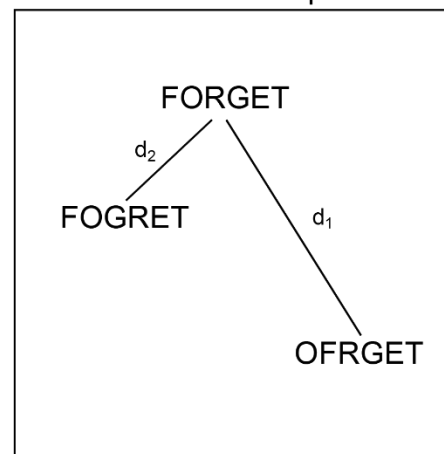

63

64

**Figure 1. Reading jumbled words**

65

(A) We are extremely good at reading jumbled words, as illustrated by the popular Cambridge University effect.

66

67

(B) Visual search array showing two oddball targets (OFRGET & FOGRET) among many instances of FORGET. OFRGET is easy to find but not FOGRET.

68

69

(C) Schematic representation of these strings in visual search space, arranged such that similar items (corresponding to harder searches) are nearby. Thus, FOGRET is closer to FORGET compared to OFRGET (i.e.  $d_1 > d_2$ ).

70

71

72

## RESULTS

73           We performed five key experiments. In Experiment 1, subjects performed visual  
74 search involving single letters, and we used this to construct artificial neurons tuned  
75 for letter shape. In Experiments 2-4, we show that search for longer strings can be  
76 predicted using these artificial neurons with a simple compositional rule. In Experiment  
77 5, we show that this model also explains human performance on a commonly studied  
78 word recognition task. Finally, in Experiment 6, we measured brain activations during  
79 word recognition to elucidate the underlying neural representations.

80

### 81 **Experiment 1: Single letter searches**

82           We recruited 16 subjects to perform an oddball visual search task involving  
83 uppercase letters ( $n = 26$ ), lowercase letters ( $n = 26$ ) and digits ( $n = 10$ ). An example  
84 search is shown in Figure 2A. Subjects were highly consistent in their responses (split-  
85 half correlation between average search times of odd- and even-numbered subjects:  
86  $r = 0.87$ ,  $p < 0.00005$ ). We calculated the reciprocal of search times for each letter pair  
87 which is a measure of distance between them (Arun, 2012). These letter dissimilarities  
88 were significantly correlated with previously reported subjective dissimilarity ratings  
89 (Section S1).

90           Since shape dissimilarity in visual search matches closely with neural  
91 dissimilarity in visual cortex (Sripati and Olson, 2010a; Zhivago and Arun, 2014), we  
92 asked whether these letter distances can be used to reconstruct the underlying neural  
93 responses to single letters. To do so, we performed a multidimensional scaling (MDS)  
94 analysis, which finds the  $n$ -dimensional coordinates of all letters such that their  
95 distances match the observed visual search distances. In the resulting plot for 2  
96 dimensions for uppercase letters (Figure 2B), nearby letters correspond to small

97 distances i.e. long search times. The coordinates of letters along a particular  
98 dimension can then be taken as the putative response of a single neuron. For example,  
99 the first dimension represents the activity of a neuron that responds strongest to the  
100 letter O and weakest to X (Figure 2C). Likewise the second dimension corresponds to  
101 a neuron that responds strongest to L and weakest to E (Figure 2C). We note that the  
102 same set of distances can be obtained from a different set of neural responses: a  
103 simple coordinate axis rotation would result in another set of neural responses with an  
104 equivalent match to the observed distances. Thus, the estimated activity from MDS  
105 represents one possible solution to how neurons should respond to individual letters  
106 so as to collectively produce behaviour.

107         As expected, increasing the number of MDS dimensions led to increased match  
108 to the observed letter dissimilarities (Figure 2D). Taking 10 MDS dimensions, which  
109 explain nearly 95% of the variance, we obtained the single letter responses of 10 such  
110 artificial neurons. We used these single letter responses to predict their response to  
111 longer letter strings in all the experiments. Varying this choice yielded qualitatively  
112 similar results. Analogous results for all letters and numbers are shown in Section S1.  
113

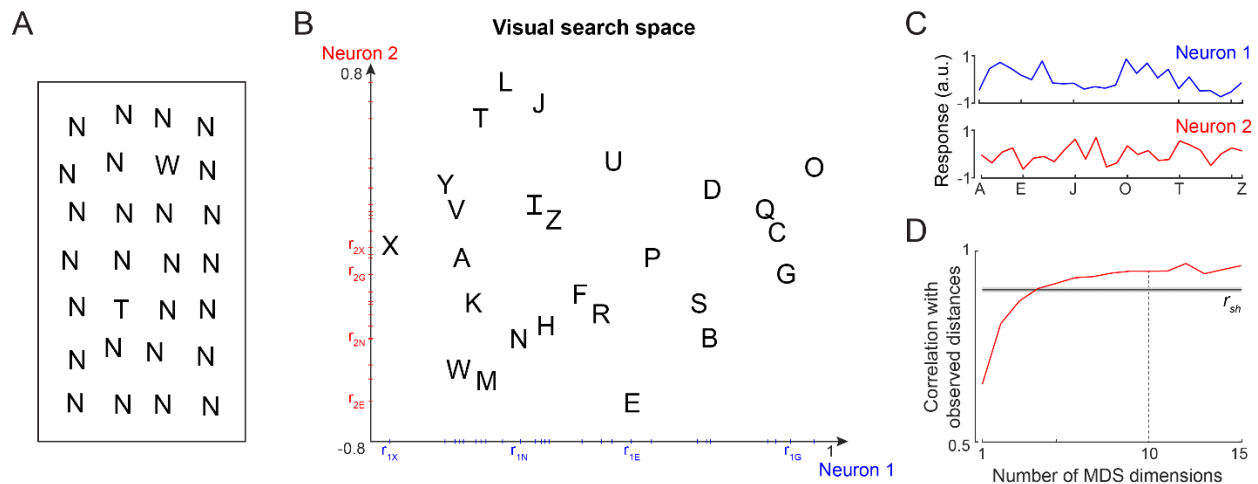

114  
115  
116  
117  
118  
119  
120  
121  
122  
123  
124  
125  
126  
127  
128  
129  
130

### Figure 2. Single letter discrimination (Experiment 1)

- (A) Visual search array showing two oddball targets (W & T) among many Ns. It can be seen that finding W is harder compared to finding T. The actual experiment comprised search arrays with only one oddball target among 15 distractors.
- (B) Visual search space for uppercase letters obtained by multidimensional scaling of observed dissimilarities. Nearby letters represent hard searches. Distances in this 2D plot are highly correlated with the observed distances ( $r = 0.82$ ,  $p < 0.00005$ ). Letter activations along the x-axis are taken as responses of Neuron 1 (*blue*), and along the y-axis are taken as Neuron 2 (*red*), etc. The tick marks indicate the response of each letter along that neuron.
- (C) Responses of Neuron 1 and Neuron 2 shown separately for each letter. Neuron 1 responds best to O, whereas Neuron 2 responds best to L.
- (D) Correlation between observed distances and MDS embedding as a function of number of MDS dimensions. The *black* line represents the split-half correlation with error bars representing s.d calculated across 100 random splits.



## 131 **Experiment 2: Bigram searches**

132       Next we proceeded to ask whether searches for longer strings can be explained  
133 using single letter responses. In Experiment 2, we asked subjects to perform oddball  
134 searches involving bigrams. An example search is depicted in Figure 3A. It can be  
135 seen that, finding TA among AT is harder than finding UT among AT. Thus, letter  
136 transpositions are more similar compared to letter substitutions, consistent with the  
137 classic results on reading (Norris, 2013; Grainger, 2018). To characterize the effect of  
138 bigram frequency, we included both frequent bigrams (e.g. IN, TH) and infrequent  
139 bigrams (e.g. MH, HH). As before, subjects were highly consistent in their performance  
140 (split-half correlation between odd and even numbered subjects across all bigrams:  $r$   
141 = 0.82,  $p < 0.00005$ ).

142       Next we asked whether bigram search performance can be explained using  
143 neurons tuned to single letters estimated from Experiment 1. The essential principle  
144 for constructing bigram responses is depicted in Figure 3B. In monkey visual cortex,  
145 the response of single neurons to two simultaneously presented objects is an average  
146 of the single object responses (Zoccolan et al., 2005; Zhivago and Arun, 2014; Pramod  
147 and Arun, 2018). This averaging can easily be biased through changes in divisive  
148 normalization (Ghose and Maunsell, 2008). Therefore we took the response of each  
149 neuron to a bigram to be a weighted sum of its responses to the constituent letters  
150 (Figure 3B). Specifically, the response of a neuron to the bigram AB is given by  $r_{AB} =$   
151  $w_1 r_A + w_2 r_B$ , where  $r_{AB}$  is the response to AB,  $r_A$  and  $r_B$  are its responses to the  
152 constituent letters A & B, and  $w_1$ ,  $w_2$  are the summation weights reflecting the  
153 importance of letters A & B in the summation. Note that if  $w_1 = w_2$ , the bigram response  
154 to AB and BA will be identical. Thus, discriminating letter transpositions necessarily  
155 requires asymmetric summation in at least one of the neurons.

156 To summarize, the letter model for bigrams has two unknown spatial weighting  
157 parameters for each of the 10 neurons, resulting in  $2 \times 10 = 20$  free parameters. To  
158 calculate dissimilarities between a pair of bigrams, we calculated the Euclidean  
159 distance between the 10-dimensional response vectors corresponding to the two  
160 bigrams. The data collected in the experiment comprised dissimilarities (1/RT) from  
161 1,176 searches involving all possible pairs of 49 bigrams. To estimate the model  
162 parameters, we optimized them to match the observed bigram dissimilarities using  
163 standard nonlinear fitting algorithms (see Methods).

164 This letter model yielded excellent fits to the observed data ( $r = 0.85$ ,  $p <$   
165  $0.00005$ ; Figure 3C). To assess whether the model explains all the systematic  
166 variance in the data, we calculated an upper bound estimated from the inter-subject  
167 consistency (see Methods). This consistency measure ( $r_{\text{data}} = 0.90$ ) was close to the  
168 model fit, suggesting that the model captured nearly all the systematic variance in the  
169 data. As predicted in the schematic figure (Figure 3B), the estimated spatial  
170 summation weights were unequal (absolute difference between  $w_1$  and  $w_2$ , mean  $\pm$  sd:  
171  $0.07 \pm 0.04$ ). To assess whether this difference is statistically significant, we randomly  
172 shuffled the observed dissimilarities and estimated these weights. The absolute  
173 difference between shuffled weights was significantly smaller than for the original  
174 weights (average absolute difference:  $0.03 \pm 0.02$ ;  $p < 0.005$ , sign-rank test across 10  
175 neurons).

176 According to an influential account of word reading, specialized detectors are  
177 formed for frequently occurring combinations of letters (Dehaene et al., 2005). If this  
178 were the case, searches involving frequent bigrams (e.g. TH, ND) or two letter words  
179 (e.g. AN, AM) should produce larger model errors compared to infrequent bigrams,  
180 since our model does not incorporate any bigram-selective units. Alternatively, if

181 bigram discrimination was driven entirely by single letters, we should find no difference  
182 in errors. In keeping with this latter prediction, we observed no visually obvious  
183 difference in model fits for frequent bigram pairs or word-word pairs compared to other  
184 bigram pairs (Figure 3C). To quantify this observation, we asked whether the model  
185 error for each bigram pair, calculated as the absolute difference between observed  
186 and predicted dissimilarity, covaried with the average bigram frequency of the two  
187 bigrams (for both frequent bigrams and words). This revealed a weak negative  
188 correlation whereby frequent bigram pairs showed smaller errors ( $r = -0.06$ ,  $p = 0.04$   
189 across 1176 bigram pairs). This is the opposite of what would be expected if there  
190 were specialized detectors. To further investigate possible bigram frequency effects,  
191 we compared the model error for the 20 bigram pairs with the largest mean bigram  
192 frequency with the 20 pairs with the lowest mean bigram frequency. This too revealed  
193 no systematic difference (mean  $\pm$  sd of residual error:  $0.10 \pm 0.08$  for the 20 most  
194 frequent bigrams and words;  $0.11 \pm 0.09$  for 20 least frequent bigrams;  $p = 0.80$ , rank-  
195 sum test). Thus, model errors are not systematically different for frequent compared  
196 to infrequent bigram pairs. We conclude that bigram search can be explained entirely  
197 using single neurons tuned to single letters.

198

### 199 **Experiment 3: Upright versus inverted bigrams**

200 In the letter model described above, the response to bigrams is a weighted sum  
201 of the single letter responses. As detailed earlier, a critical prediction of this model is  
202 that the response to transposed bigrams such as AB & BA will be different only if the  
203 summation weights are unequal. By contrast, repeated letter bigrams such as AA &  
204 BB will remain discriminable regardless of the nature of summation, since their  
205 response will be proportional to the respective single letter responses. Since reading

206 expertise can modulate sensitivity to letter transpositions, we reasoned that familiarity  
207 might modulate the summation to make it more asymmetric. We therefore predicted  
208 that this would make transposed letter searches (with AB as target and BA as  
209 distractor, or vice-versa) easier to discriminate in a familiar upright orientation  
210 compared to the (unfamiliar) inverted orientation. By contrast, searches involving  
211 repeated letter bigrams (with AA as target and BB as distractor), which also have a  
212 change in two letters, will remain equally easy in both upright and inverted orientations.

213 We tested this prediction in Experiment 3 by asking subjects to perform  
214 searches involving upright and inverted bigrams. The essential findings are  
215 summarized in Figure 3D. As predicted, subjects discriminated repeated letter bigrams  
216 (AA-BB searches) equally well at both upright and inverted orientations, but were  
217 substantially faster at discriminating transposed letter pairs (AB-BA searches) in the  
218 upright orientation (Figure 3D; for detailed analyses see Section S2). We obtained  
219 similar results on comparing upright and inverted trigrams as well (Section S2).

220 We conclude that familiarity leads to asymmetric spatial summation.

221

222

223

224

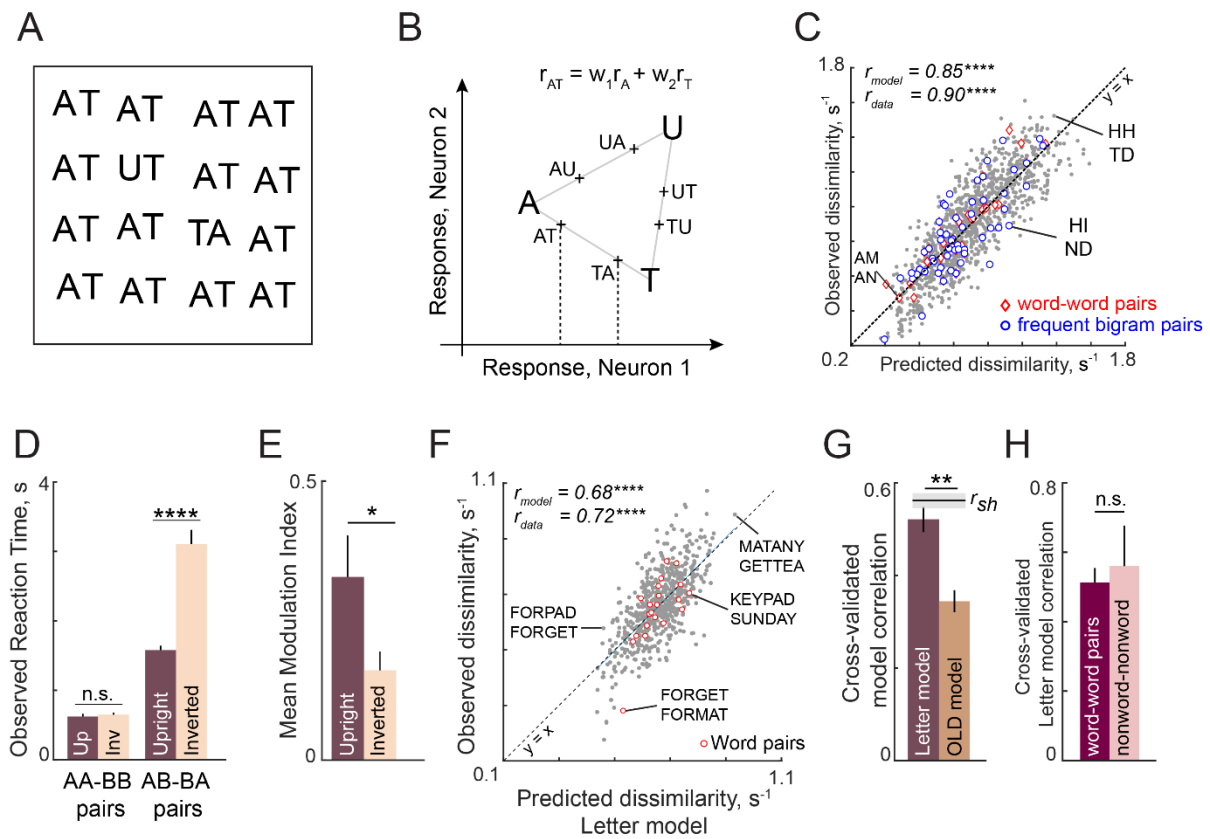

225  
226

227

**Figure 3. Discrimination of strings is explained using single letters (Expts 2-4)**

228

(A) Example search array with two oddball targets (UT & TA) among the bigram AT. It can be seen that UT is easier to find than TA, showing that letter substitution causes a bigger visual change compared to transposition.

230

231

(B) Schematic diagram of how the bigram response is obtained from letter responses. Consider two neurons selective to single letters A, T & U. These letters can be represented in a 2D space in which the response to each neuron lies along one axis. For each neuron, we take the response to a bigram to be a weighted sum of the single letter responses. Thus, the bigram response lies along the line joining the two stimuli. Note that the bigrams AT and TA can be distinguished only if there is unequal summation. In the schematic, the first position is taken to have higher magnitude, as a result of which the response to AT is closer to A than to T.

238

239

(C) Observed dissimilarities between bigram pairs plotted against predictions of the letter model for word-word pairs (*red diamonds*), frequent bigram pairs (*blue circles*) and all other bigram pairs (*gray dots*), for Experiment 2. Model correlation is shown at the top left, along with the data consistency for comparison. Asterisks indicate the statistical significance of the correlations (\*\*\*\* is  $p < 0.00005$ ).

242

243

244

(D) Average observed search reaction time for upright (dark) and inverted (pale) bigram searches for repeated letter pairs (AA-BB pairs) and transposed letter pairs (AB-BA pairs) in Experiment 3. Asterisks indicate statistical significance of the main effect of orientation in an ANOVA (see text for details; \*\*\*\* is  $p < 0.00005$ ).

247

248

(E) Mean modulation index of the summation weights, calculated as  $|w_1 - w_2| / |w_1 + w_2|$ , where  $w_1$  and  $w_2$  are the bigram summation weights, averaged across the 10 neurons in the letter model for upright (dark) and inverted (pale) bigrams. The asterisk indicates statistical significance calculated on a sign-rank test comparing the modulation index across 10 neurons (\* is  $p < 0.05$ ).

251  
252

- 253 (F) Observed dissimilarities between 6-letter strings in visual search (Experiment 4)  
254 plotted against predicted dissimilarities from the single letter model for word-word  
255 pairs (*red dots*) and all other pairs (*gray dots*). Model correlation is shown at the  
256 top left with data consistency for comparison. Asterisks indicate statistical  
257 significance of the correlations (\*\*\*\* is  $p < 0.00005$ ).
- 258 (G) Cross-validated model correlation for the letter model (*dark*) and the Orthographic  
259 Levenshtein distance (OLD) model (*light*). For each model, the cross-validated  
260 correlation is the correlation between model predictions trained on one half of the  
261 data and the observed response times from the other half. The upper bound on  
262 model fits is the split-half correlation ( $r_{sh}$ ) shown in black with shaded error bars  
263 representing standard deviation across 1000 random splits. The asterisk indicates  
264 statistical significance of the comparison obtained by estimating the fraction of  
265 bootstrap samples in which the observed difference was violated (\*\* is  $p < 0.005$ ).
- 266 (H) Cross-validated letter model correlation for word-word pairs and nonword-nonword  
267 pairs.  
268

### 269 **Generalization to longer strings**

270 To investigate whether these results would generalize to longer strings which  
271 can contain frequent words, we performed several additional visual search  
272 experiments using 3, 4, 5 and 6-letter uppercase strings (Section S4). In Experiment  
273 4, subjects performed visual search involving six-letter strings that were either valid  
274 compound words (e.g. FORGET, TEAPOT) or pseudowords (FORPOT, TEAGET).  
275 The single letter model yielded excellent fits to the data (Figure 3F). These fits were  
276 superior to a widely used measure of string similarity, the Orthographic Levenshtein  
277 Distance (OLD) model (Figure 3G). Importantly, the letter model fits were equivalent  
278 for both word-word pairs and nonword-nonword pairs (Figure 3H). These and other  
279 analyses are described in Section S3.

280 The letter model also yielded excellent fits across all string lengths tested. We  
281 also tested lowercase and mixed-case strings because word shape is thought to play  
282 a role when letters vary in size or have upward and downward deflections (Pelli and  
283 Tillman, 2007). Even here, the letter model, without any explicit representation of  
284 overall word shape, was able to accurately predict most of the search performance.  
285 These results are detailed in Section S4.

286           The letter model described is neurally plausible and compositional, but is based  
287 on dissimilarities between letters presented in isolation. It could be that the  
288 representation of a letter within a bigram, although compositional, differs from its  
289 representation when seen in isolation. To explore these possibilities we developed an  
290 alternate model in which bigram dissimilarities can be predicted using a sum of  
291 (unknown) part dissimilarities at different locations. The resulting model, which we  
292 denote as the part sum model, yielded comparable fits to the data. It is completely  
293 equivalent to the letter model under certain conditions. Unlike the letter model which  
294 is nonlinear and could suffer from multiple local minima, the part sum model is linear  
295 and its parameters can be estimated uniquely using standard linear regression. Its  
296 complexity can be drastically reduced using simplifying assumptions without affecting  
297 model fits. These results are detailed in Section S5.

298

### 299 **Experiment 5: Lexical decision task**

300           The above experiments show that discrimination of strings in visual search can  
301 be explained by neurons tuned for single letter shape with letter responses that  
302 combine linearly. Could the same shape representation drive reading behaviour? We  
303 evaluated this possibility through two separate word recognition experiments.

304           In Experiment 5, we used a widely used paradigm for word recognition, a lexical  
305 decision task (Norris, 2013; Grainger, 2018). Subjects had to indicate whether a string  
306 of letters is a word or not using a keypress. The words comprised 4, 5 or 6-letter words  
307 and the nonwords consisted of random strings and jumbled words. Subjects were  
308 highly accurate in responding to both words and nonwords (mean  $\pm$  sd: 96  $\pm$  2% for  
309 words, 95  $\pm$  3% for nonwords). Importantly, their response times across words and  
310 nonwords were consistent as evidenced by a significant split-half correlation



311 (correlation between odd- and even-numbered subjects:  $r = 0.59$  for words,  $r = 0.73$   
312 for nonwords,  $p < 0.00005$ ). Since responses in lexical decision tasks are thought to  
313 depend on accumulation of evidence towards or against word status (Ratcliff et al.,  
314 2004; Ratcliff and McKoon, 2008), we hypothesized that looking at a string of letters  
315 will activate the compositional neural code for the string which is then compared to  
316 stored patterns corresponding to known words.

317 We started by characterizing response times for words. To depict the  
318 systematic variation in word response times, we plotted them in descending order  
319 (Figure 4A). Subjects took longer to respond to infrequent words like MALICE  
320 compared to frequent words like MUSIC. If the string is a word, the response time will  
321 depend on the strength of the stored pattern, which in turn would depend on lexical  
322 factors such as word frequency (Ratcliff et al., 2004; Ratcliff and McKoon, 2008).  
323 Indeed, response times for words showed a negative correlation with log word  
324 frequency ( $r = -0.5$ ,  $p < 0.00005$  across 450 words). We also estimated other lexical  
325 factors such as the logarithm of the letter frequency (averaged across letters of the  
326 string), logarithm of the bigram frequency (averaged across all bigrams in the string),  
327 and the number of orthographic neighbours (i.e. number of nearby words), which are  
328 all standard measures in linguistic corpora (see Methods).

329 To avoid overfitting, we trained a model based on each factor on one half of the  
330 subjects and tested it on the other half. This cross-validated performance is shown for  
331 all lexical factors in Figure 4B. It can be seen that the word frequency is the best  
332 predictor of word response times (Figure 4B). To assess whether all lexical factors  
333 together predict word response times any better, we fit a combined model in which the  
334 word response times are modelled as a linear sum of the four factors. The combined  
335 model performance was comparable to the performance of the word frequency model



336 alone (Figure 4B). To assess the statistical significance of these results, we performed  
337 a bootstrap analysis. On each trial, we trained all models on the dissimilarity obtained  
338 from considering only one randomly chosen half of subjects. We calculated the  
339 correlation between each model's predictions on the other half of the data, and  
340 repeated this procedure 1000 times. Across these samples, the word frequency model  
341 performance rarely fell below all other individual models ( $p < 0.005$ ). We conclude that  
342 word response times are determined primarily by word frequency.

343         Next we investigated the factors determining the nonword response times. The  
344 nonword responses are plotted in descending order in Figure 4C. Subjects took longer  
345 to respond to jumbled words like PENICL (original word: PENCIL) with fewer  
346 transpositions compared to VTAOCE (original word: OCTAVE) with more  
347 transpositions. We hypothesized that, if a string is a nonword, the response will be  
348 slow if there is a nearby stored pattern corresponding to a word, and fast otherwise  
349 (Dufau et al., 2012; Yap et al., 2015). Likewise the response is likely to be faster if the  
350 nearest word is highly familiar (i.e. frequent in the lexicon). Specifically, nonword  
351 response times will be inversely proportional to the dissimilarity of the nonword to the  
352 nearest word (Figure 4D), and also inversely proportional to the frequency of the  
353 nearest word (Figure 4D).

354         To test this prediction, we took the letter model with 10 neurons with single letter  
355 tuning and optimized the spatial summation weights to match the reciprocal of the  
356 nonword responses for each word length. The model yielded excellent fits to the data  
357 ( $r = 0.70$ ,  $p < 0.00005$ ; Figure 4E). This model fit was comparable to the data  
358 consistency ( $r_{data} = 0.84$ ). Importantly, this model was able to explain classic  
359 phenomena in orthographic processing. Specifically, subjects took longer to respond  
360 to nonwords obtained by transposing a letter of a word, compared to nonwords

361 obtained through letter substitution – these trends were present in the model  
362 predictions as well (Figure 4F). Likewise, subjects took longer when the middle letters  
363 were transposed compared to when the edge letters were transposed – as did the  
364 model predictions (Figure 4F). These effects replicate the classic orthographic  
365 processing effects reported across many studies (Grainger et al., 2012; Norris, 2013;  
366 Ziegler et al., 2013; Grainger, 2018).

367         Next we asked whether a widely used measure of orthographic distance could  
368 explain the same data. We selected the Orthographic Levenshtein Distance (OLD), in  
369 which the net distance between two strings is calculated as the minimum number of  
370 letter additions, transpositions and deletions required to transform one string into  
371 another. The OLD model yielded relatively poorer predictions of the data ( $r = 0.36$ ,  $p$   
372  $< 0.00005$ ; Figure 4G).

373         We compared the letter model with two alternate models: the OLD model and  
374 a model based on lexical factors. The OLD model is as described above. In the lexical  
375 model, the nonword response time is modelled as a linear sum of log word frequency,  
376 log mean bigram frequency of words, log mean bigram frequency of nonwords, #  
377 orthographic neighbours, log letter frequency. Since all three models have different  
378 numbers of free parameters, we compared their performance using cross-validation:  
379 we trained each model on one-half of the subjects and evaluated it on the other half  
380 of the subjects. The resulting cross-validated model fits are shown in Figure 4H. The  
381 letter model outperformed both the OLD model and the lexical model (model  
382 correlations:  $r = 0.56 \pm 0.02$ ,  $0.33 \pm 0.01$  and  $0.35 \pm 0.01$  for the neural, OLD and  
383 lexical models; fraction of bootstrap samples with neural  $<$  other models:  $p < 0.005$ ;  
384 Figure 4H). To be absolutely certain that the superior fit of the letter model was not  
385 simply due to having more free parameters, we compared the lexical model with a

386 reduced version of the letter model with only 5 free parameters (SID model; Section  
387 S5). Even this reduced model yielded fits were better than the lexical model (SID  
388 model correlation:  $r = 0.48 \pm .02$ ). Finally, a combined model – in which the neural and  
389 lexical model predictions were linearly combined – proved to explain more variance  
390 than either model (Figure 4H).

391 In sum, we conclude that word response times are explained by word frequency  
392 and nonword response times are explained by the distance between the nonword and  
393 the nearest word calculated using the compositional neural code. As a further test of  
394 the ability of this compositional code to explain word reading, we performed an  
395 additional experiment in which subjects had to recognize the identity of a jumbled  
396 word. Here too, response times were explained best by the letter model compared to  
397 lexical and OLD models (Section S6).

398

399

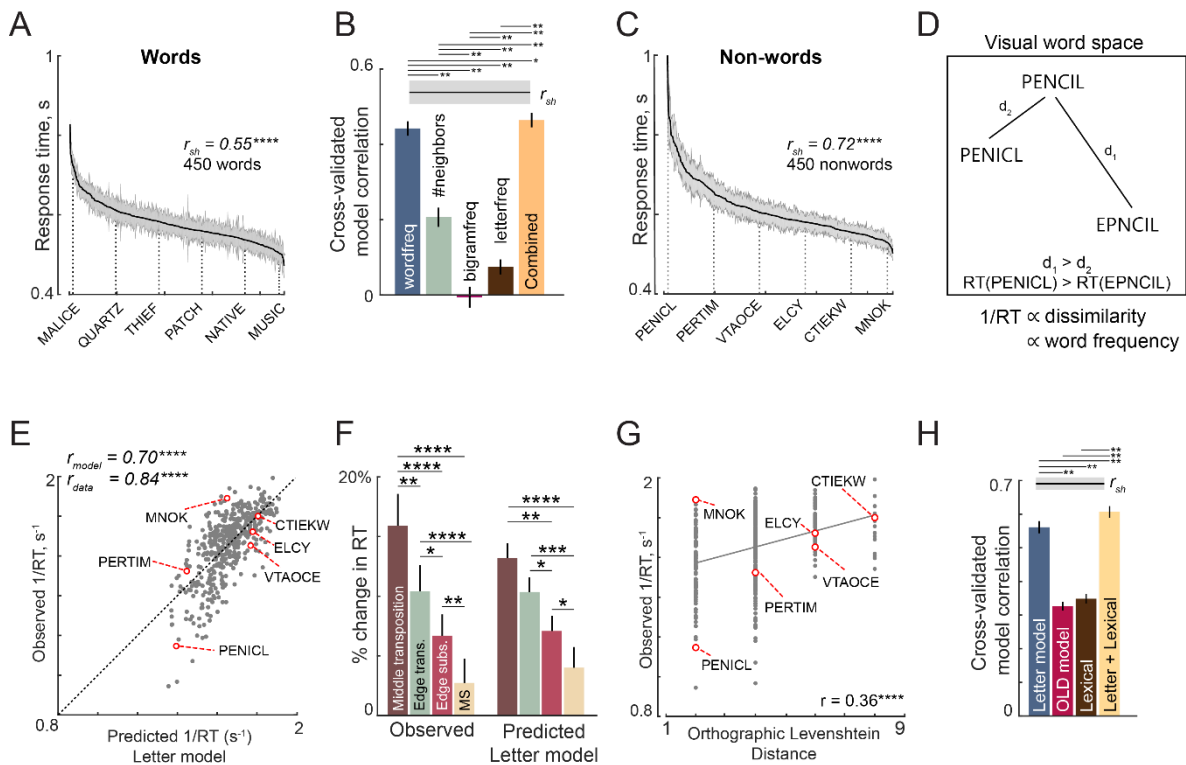

**Figure 4. Lexical decision task behaviour (Experiment 5)**

- (A) Response times for words in the lexical decision task, sorted in descending order. The solid line represents the mean categorization time for words and the shaded bars represent s.e.m. Some example words are indicated using dotted lines. The split-half correlation between subjects ( $r_{sh}$ ) is indicated on the top.
- (B) Cross-validated model correlation between observed and predicted word response times across all words for various models: log word frequency (*blue*), number of orthographic neighbours (*orange*), log mean bigram frequency (*purple*), log mean letter frequency (*cyan*) and a combined model containing all these factors (*red*). Shaded error bars indicate mean  $\pm$  sd of the correlation across 1000 random splits of the observed data. The asterisk indicates statistical significance of the comparison obtained by estimating the fraction of bootstrap samples in which the observed difference was violated (\* is  $p < 0.05$ , \*\* is  $p < 0.005$ ).
- (C) Response times for nonwords in the lexical decision task, sorted in descending order. Conventions as in (A).
- (D) Schematic of visual word space, with one stored word (PENCIL) and two nonwords (PENICL & EPNCIL). We hypothesize that subjects would take longer to categorize a nonword when it is similar to a word, i.e. RT for PENICL would be larger than for EPNCIL. Thus,  $1/RT$  would be proportional to this dissimilarity, and also to word frequency.
- (E) Observed reciprocal response times for nonwords in the lexical decision task plotted against letter model predictions fit to the full dataset (450 nonwords). Some example nonwords are depicted.
- (F) Percent change in response time (nonword-RT – word-RT)/word-RT for middle & edge letter transpositions and for middle & edge substitutions for observed data (*left*) and for letter model predictions (*right*). MS: middle substitution. In both cases, asterisks represent statistical significance comparing the means of the corresponding groups using a rank-sum test (\* is  $p < 0.05$ , \*\* is  $p < 0.005$ , etc.).

429 (G) Observed reciprocal response times plotted against the Orthographic Levenshtein  
430 Distance (OLD), a popular model for edit distance between strings.  
431 (H) Cross-validated model correlation between observed and predicted nonword RTs  
432 for the letter model, OLD model, lexical model and the combined neural+lexical  
433 model. Conventions are as in (B).  
434

### 435 **Brain activations during lexical decisions (Experiments 6-7)**

436 The above results show that visual discrimination of strings can be explained  
437 using a letter-based compositional neural code, and that dissimilarities calculated  
438 using this code can explain human performance on reading tasks. Here, we sought to  
439 uncover the brain regions that represent this code and guide eventual lexical  
440 decisions.

441 In Experiment 6, we recorded neural activations using fMRI while subjects  
442 performed a lexical decision task. Since lexical decision times for nonwords can be  
443 predicted using visual dissimilarity, we performed a separate experiment to directly  
444 estimate visual dissimilarities using visual search (Experiment 7; see Methods).  
445 Additionally, we estimated the semantic dissimilarity between words in order to  
446 compare visual and semantic representations in different ROIs (see Methods).  
447 Importantly, the visual search and semantic dissimilarities were uncorrelated ( $r = 0.03$ ,  
448  $p = 0.55$ ), thereby allowing us to identify regions with distinct or overlapping  
449 visual/semantic representations. The visual and semantic representations are  
450 visualized in Section S7.

451 We identified several possible regions of interest (ROIs) using a combination of  
452 functional localizers and anatomical considerations (see Methods). These included the  
453 early and mid-level visual areas (V1-V3 & V4), the object-selective lateral occipital  
454 region (LO), and two language areas: the visual word form area (VWFA) which  
455 selectively responds to words and a broad region in the temporal gyrus reading

456 network (TG). The flattened brain map of a representative subject with these ROIs is  
457 shown in Figure 5A.

458 For the main event-related block, subjects had to make a response on each  
459 trial to indicate whether a string displayed on the screen was a word or not. The stimuli  
460 consisted of 5-letter words, nonwords. Subjects also viewed single letters, to which  
461 they had to make no response. Subjects were highly accurate (mean  $\pm$  std of accuracy:  
462  $94 \pm 4\%$ ) and showed consistent response time variations (split-half correlation  
463 between odd and even subjects:  $r_{sh} = 0.54$  &  $0.79$  for words and nonwords,  $p <$   
464  $0.00005$ ). As before, the lexical decision time for words was negatively correlated with  
465 word frequency ( $r = -0.42$ ,  $p < 0.05$ ). Likewise, the lexical decision times for nonwords  
466 were strongly correlated with the word-nonword dissimilarity measured in visual  
467 search in Experiment 7 ( $r = -0.68$ ,  $p < 0.00005$ ). These results reconfirm the findings  
468 of the previous experiment performed outside the scanner.

469 We first compared the overall brain activation levels for words, nonwords and  
470 letters in each ROI. While V4 showed greater activation for words compared to  
471 nonwords, VWFA and TG regions showed greater activation to nonwords compared  
472 to words, presumably reflecting greater engagement to discriminate nonwords that are  
473 highly similar to words (Section S7). Although the visual regions did not show  
474 differential overall activations, there could still be differential activation at the  
475 population level for words and nonwords. To assess this possibility, we built linear  
476 classifiers to discriminate words from nonwords using the voxel population activity in  
477 each ROI. This revealed above-chance classification in all ROIs. Further,  
478 discriminating words from nonwords was significantly easier for nonwords that were  
479 obtained by substituting letters compared to those obtained by transposing letters  
480 (Section S7). Correspondingly, in behaviour, subjects were faster at responding to

481 substituted nonwords compared to transposed nonwords (response times, mean  $\pm$  sd:  
482 1.03  $\pm$  0.08 s for 16 substituted nonwords, 1.20  $\pm$  0.15 s for 16 transposed nonwords,  
483  $p < 0.005$ , rank-sum test comparing average response times). A detailed analysis of  
484 these results is presented in Section S7.

485

#### 486 **Neural correlates of the compositional letter code**

487       Next we sought to compare the neural representations in each ROI with visual  
488 search and semantic representations. The visual search and semantic representations  
489 can be quite distinct, as depicted in Figure 5B: in visual search space, TRAIL and  
490 TRIAL can be quite similar since one is obtained from the other by transposing letters,  
491 but the word PATH is quite distinct. By contrast, in semantic space, TRAIL and PATH  
492 have similar meanings and usage whereas TRIAL is quite distinct. Indeed, visual  
493 search and semantic dissimilarities across words were uncorrelated for the words in  
494 experiment ( $r = 0.03$ ,  $p = 0.55$ ).

495       To investigate these issues, we calculated the neural dissimilarity between  
496 each stimulus pair in a given ROI as the cross-validated Mahalanobis distance  
497 between the voxel-wise activations evoked by the two stimuli. We then averaged this  
498 dissimilarity across subjects to get an average neural dissimilarity for that ROI. We  
499 then compared this neural dissimilarity in each ROI with visual dissimilarities estimated  
500 from visual search. This match to visual search dissimilarity is shown in Figure 5C.  
501 Among the ROIs tested, only the LO dissimilarities showed a significant correlation  
502 (correlation between 1024 pairwise dissimilarities involving  $^{32}C_2$  words,  $^{32}C_2$   
503 nonwords, and 32 word-nonword pairs:  $r = 0.16$ ,  $p < 0.00005$ ; Figure 5C). A searchlight  
504 analysis confirmed that the match to visual search dissimilarities was strongest in a  
505 region centred around the bilateral LO region (Section S7). Thus, neural dissimilarity



506 in the LO region match best with the visual dissimilarities observed in visual search.  
507 We therefore conclude that LO is the likely neural substrate for the compositional letter  
508 code.

509 To further investigate the link between the compositional letter code and the LO  
510 representation, we performed several additional analyses. First, we asked whether the  
511 neural activation of each voxel in LO could be explained using a linear sum of the  
512 single letter activations. Importantly, these model fits were equally good for words and  
513 nonwords. This parallels our finding that dissimilarity in visual search was predicted  
514 equally well for word-word and nonword-nonword pairs (Figure 3H). Both these results  
515 suggest that there are no specialized detectors for letter combinations (Section S7).  
516 Second, we confirmed that both the neural tuning for single letters, and the summation  
517 weights estimated from the behavioural data in the letter model were qualitatively  
518 similar to the observed tuning for single letters and summation weights observed in  
519 the voxel activations for the LO region (Section S7).

520 In sum, we conclude that the LO region is the likely neural substrate for the  
521 compositional letter code predicted from behaviour.

522

### 523 **Neural basis of semantic space**

524 Next we compared neural representations in each ROI to semantic space. The  
525 match to semantic space was significant only in the LO and TG regions (correlation  
526 between 496 pairwise dissimilarities between words:  $r = 0.18 \pm 0.05$  for LO,  $0.22 \pm$   
527  $0.04$  for TG; Figure 5D).

528 The above analysis shows that neural activations in LO are correlated with both  
529 visual search and semantic dissimilarities, but these correlations cannot be directly  
530 compared since they are based on different pairs of stimuli. To investigate whether the



531 neural representation in LO matches better with visual search or with semantic space,  
532 we compared the match for word-word pairs alone. This revealed no significant  
533 difference between the two correlations ( $r = 0.16 \pm .04$  for LO with visual search,  $r =$   
534  $0.16 \pm 0.05$  for LO with semantic space;  $p = 0.49$  across 1000 bootstrap samples). We  
535 conclude that both LO and TG regions represent semantic space.

536

### 537 **Neural basis of lexical decisions**

538 If the LO region represents each string (word or nonword) using a compositional  
539 code, then according to the preceding experiments, lexical decisions for words and  
540 nonwords must involve some comparison with stored word representations. Recall  
541 that lexical decision times for words are correlated with word frequency, and lexical  
542 decision times for nonwords are correlated with word-nonword dissimilarity. We  
543 therefore asked whether these lexical decision times are correlated with the average  
544 activity (across voxels & subjects) in a given ROI. The resulting correlations are shown  
545 in Figure 5F. Across the ROIs, only the VWFA showed a consistently positive  
546 correlation with lexical decision times for both words and nonwords (Figure 5E). A  
547 searchlight analysis confirmed that there was indeed a peak in the correlation with  
548 lexical decision times centred on the VWFA, with additional peaks in the parietal and  
549 frontal regions (Section S7). This is consistent with word frequency effects observed  
550 in these regions (Kronbichler et al., 2004), but we have observed similar effects for  
551 nonwords as well. We conclude that lexical decisions are driven by the VWFA.

552

553

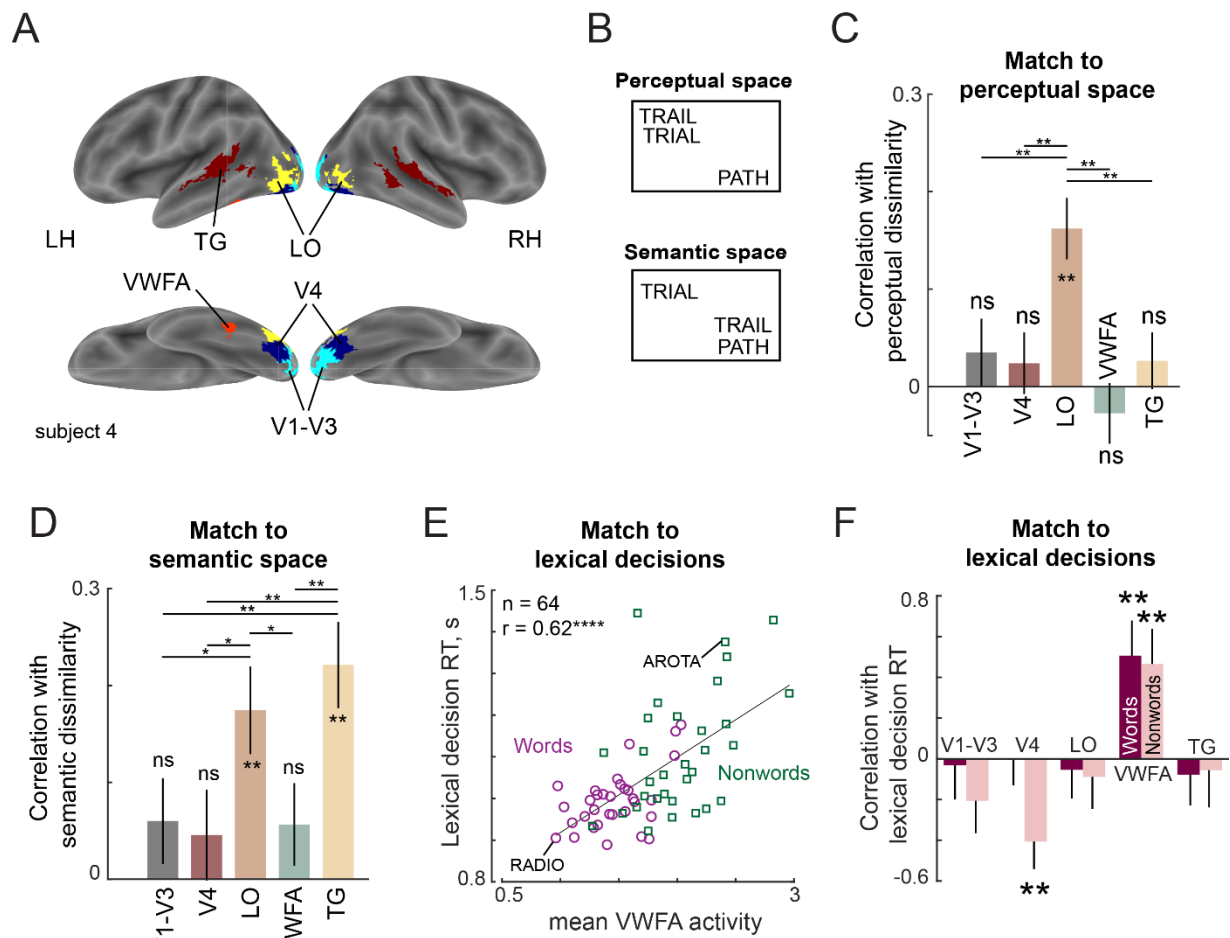

554

555

### Figure 5. Lexical task fMRI (Experiment 6)

556 (A) ROIs for an example subject, showing V1–V3 (cyan), V4 (blue), LO (yellow), VWFA (red) and TG (maroon).

557  
558 (B) Example difference between perceptual and semantic spaces. In perceptual space, the representation of TRAIL is closer to its visual similar counterpart TRIAL, whereas in semantic space, its representation is closer to its synonym PATH.

559  
560  
561 (C) Correlation between neural dissimilarity in each ROI with behavioural dissimilarity for strings (Experiment 7). Error bars indicate standard deviation of the correlation between the group behavioural dissimilarity and ROI dissimilarities calculated repeatedly by resampling of dissimilarity values with replacement across 1000 iterations. Asterisks along the length of each bar indicate statistical significance of the correlation between group behaviour and group ROI dissimilarity (\*\* is  $p < 0.005$  across 1000 bootstrap samples). Horizontal lines indicate the fraction of bootstrap samples in which the observed difference was violated (\* is  $p < 0.05$ , \*\* is  $p < 0.005$ , etc.). All significant comparisons are indicated.

570 (D) Correlation between neural dissimilarity in each ROI with semantic dissimilarity for words. Other details are same as in (C).

571  
572 (E) Correlation between mean VWFA activity (averaged across subjects and voxels) with mean lexical decision time for both words (purple circles) and nonwords (green squares). Each point corresponds to one string and example word and nonword is highlighted. Asterisks indicate statistical significance (\*\*\*\* is  $p < 0.00005$ ).

573  
574  
575  
576 (F) Correlation between lexical decision time and mean activity within each ROI separately for words and nonwords. Error bars indicate standard deviation across 1000 bootstrap splits. Asterisks indicate statistical significance (\*\* is  $p < 0.005$ ).

577

578

579

## DISCUSSION

580           Our main finding is that viewing a string activates a compositional letter code,  
581 consisting of neurons tuned to single letters whose response to longer strings is a  
582 linear sum of single letter responses. This code accurately explains human  
583 performance on visual search as well as word reading tasks. It is encoded by the LO  
584 region in the high-level visual cortex, and subsequent comparisons required for lexical  
585 decisions are computed in the VWFA. Below we discuss these findings in relation to  
586 the existing literature.

587

### 588 **Relation to models of reading**

589           Our compositional letter code stands in stark contrast to existing models of  
590 reading. Existing models of reading assume explicit encoding of letter position and do  
591 not account for letter shape (Gomez et al., 2008; Davis, 2010; Norris and Kinoshita,  
592 2012; Norris, 2013). By contrast, our model encodes letter shape explicitly and position  
593 implicitly through asymmetric spatial summation. The implicit coding of letter position  
594 avoids the complication of counting transpositions (Yarkoni et al., 2008; Yap et al.,  
595 2015). Our model can thus easily be extended to any language by simply estimating  
596 letter dissimilarities and then estimating the unknown summation weights.

597           Unlike existing models of reading, our compositional letter code is neurally  
598 plausible and grounded in well-known principles of object representations. The first  
599 principle is that images that elicit similar activity across neurons in high-level visual  
600 cortex will appear perceptually similar (Op de Beeck et al., 2001; Sripathi and Olson,  
601 2010a; Zhivago and Arun, 2014). This is non-trivial because it is not necessarily true  
602 in lower visual areas or in image pixels (Ratan Murty and Arun, 2015). We have turned  
603 this principle around to construct artificial neurons whose shape tuning matches visual

604 search. The second principle is that the neural response to multiple objects is typically  
605 the average of the individual object responses (Zoccolan et al., 2005; Sripathi and  
606 Olson, 2010b) that can be biased towards a weighted sum (Ghose and Maunsell,  
607 2008; Bao and Tsao, 2018). Finally, we note that our letter code assumes no explicit  
608 calculations of letter position in a word, since the neurons in our model only need to  
609 be tuned for retinal position. We speculate that these neurons may be tuned not only  
610 to retinal position but to the relative size and position of letters, as observed in high-  
611 level visual cortex (Sripathi and Olson, 2010a; Vighneshvel and Arun, 2015).

612

### 613 **Relation to theories of word recognition**

614 We have found that lexical decisions for nonwords are driven by the dissimilarity  
615 between the viewed string and the nearest word. This idea is consistent with the well-  
616 known Interactive Activation model (McClelland and Rumelhart, 1981; Rumelhart and  
617 McClelland, 1982), where viewing a string activates the nearest word representation.  
618 However, the Interactive Activation model does not explain lexical decisions or  
619 scrambled word reading, and also does not integrate letter shape and position into a  
620 unified code. Our findings are consistent with previous work showing that nonword  
621 responses are influenced by the number of orthographic neighbours (Yap et al., 2015).  
622 Likewise, we found word frequency to be a major factor influencing lexical decisions,  
623 in keeping with previous work (Ratcliff et al., 2004; Dufau et al., 2012; Yap et al., 2015).  
624 We have gone further to demonstrate a unified letter-based code that integrates letter  
625 shape and position, and localized the underlying neural substrates of the letter code  
626 to the LO region, and the comparison process to the VWFA. We propose that the  
627 compositional shape code provides a quick match to unscramble a word, failing which  
628 subjects may initiate more detailed symbolic manipulation.

629           The success of our letter code challenges the widely held belief that reading  
630 expertise should lead to the formation of specialized bigram detectors (Dehaene et al.,  
631 2005, 2015; Grainger, 2018). The presence of these specialized detectors should have  
632 caused larger model errors for valid words and frequent n-grams, but we observed no  
633 such trend (Figure 3). So what happens to visual letter representations upon expertise  
634 with reading? Our comparison of upright and inverted bigrams suggests that reading  
635 should increase letter discrimination and increase the asymmetry of spatial summation  
636 (Figure 3D,E). This is consistent with differences in letter position effects for symbols  
637 and letters (Chanceaux and Grainger, 2012; Scaltritti et al., 2018). We propose that  
638 both processes may be driven by visual exposure: repeated viewing of letters makes  
639 them more discriminable (Mruczek and Sheinberg, 2005), while viewing letter  
640 combinations induces asymmetric spatial weighting. Whether these effects require  
641 active discrimination such as letter-sound association training or can be induced even  
642 by passive viewing will require comparing letter string discrimination under these  
643 paradigms.

644

### 645 **Neural basis of word recognition**

646           Our brain imaging results further elucidate the neural basis of lexical decisions.  
647 We have shown that viewing a string activates this compositional letter code in the LO  
648 region, and that subsequent comparisons to stored words is driven by the VWFA. We  
649 have found that lexical decision response times for both words and nonwords are  
650 strongly predicted by the VWFA activity. Since lexical decision times for words are  
651 linked to word frequency, this finding implies that VWFA is sensitive to word frequency.  
652 This has been confirmed by previous studies (Kronbichler et al., 2004; Dehaene et al.,  
653 2015). We have also found that VWFA activity is strongly predictive of nonword

654 response times, which in turn are modulated by the dissimilarity of the nonword to the  
655 nearest word. This finding is somewhat surprising because of VWFA's status as a  
656 word processing area, but consistent with previous suggestions that it stores word  
657 representations (Vinckier et al., 2007) and is modulated by orthographic similarity  
658 (Baeck et al., 2015). Our results suggest that VWFA might be involved in comparing  
659 viewed strings with known words. We speculate that differences in this comparison  
660 process could explain the contradictory findings about VWFA activation to words and  
661 nonwords (Baeck et al., 2015).

662

### 663 **Does the compositional letter code explain orthographic processing?**

664 Our letter code explains many orthographic processing phenomena reported in  
665 the literature. Its integrated representation of both letter shape and position explains  
666 both letter transposition and substitution effects and their relative importance (Figure  
667 4F). Its asymmetric spatial weighting favouring the first letter (Section S3), explains  
668 the first-letter advantage observed previously (Scaltritti et al., 2018). It also explains  
669 why increasing letter spacing can benefit reading in poor readers, presumably  
670 because it increases asymmetry in spatial summation (Zorzi et al., 2012).

671 To elucidate how various jumbled versions of a word are represented according  
672 to this neural code, we calculated responses of the letter model trained on data from  
673 Experiment 4, and visualized the distances using multidimensional scaling (Figure 6A).  
674 It can be seen transposing the edge letters (OFRGET) results in a bigger change than  
675 transposing the middle letters (FOGRET), thus explaining many transposed letter  
676 effects (Norris, 2013). Likewise, it can be seen that substituting a dissimilar letter  
677 (FORXET) leads to a large change compared to substituting a similar letter (FORCET).  
678 Replacing G with C in FORGET leads to a smaller change than replacing with X, thus

679 explaining how priming is stronger when similar letters are substituted (Marcet and  
680 Perea, 2017). Finally, the letter subset FRGT is closer to FORGET than the same  
681 letters reversed (TGRF), thereby explaining subset priming (Grainger and Whitney,  
682 2004; Dehaene et al., 2005).

683 Finally, as a powerful demonstration of this code, we used it to arbitrarily  
684 manipulate reading difficulty along a sentence (Figure 6B), or across multiple  
685 transpositions and even number substitutions (Figure 6C). We propose that this  
686 compositional neural code can serve as a powerful baseline for the purely visual  
687 shape-based representation triggered by viewing words, thereby enabling the study of  
688 higher order linguistic influences on reading processes.

689

#### 690 **Relation between word recognition and reading sentences**

691 We have shown that word recognition can be explained using a compositional  
692 visual code based on single letters. While this is an important first step in  
693 understanding how we read single words, reading sentences involves sampling many  
694 words with each eye movement (Rayner, 1998). Our ability to sample multiple letters  
695 or words at a single glance is limited by two factors. The first is our visual acuity, which  
696 reduces with eccentricity. The second is crowding, by which letters become  
697 unrecognizable when flanked by other letters – this effect increases with eccentricity  
698 (Pelli and Tillman, 2008).

699 The visual search experiments in our study involved searching for an oddball  
700 target (consisting of multiple letters) among multiple distractors. This would most  
701 certainly have involved detecting and making saccades to peripheral targets. By  
702 contrast, the word recognition tasks in our study involved subjects looking at words  
703 presented at the fovea. Our finding that visual search dissimilarity explains word

704 recognition then implies that shape representations are qualitatively similar in the  
705 fovea and periphery. Furthermore, the structure of the letter model suggests a possible  
706 mechanistic explanation for crowding. Neural responses might show greater sensitivity  
707 to spatial location at the fovea compared to the periphery, leading to more  
708 discriminable representations of multiple letters. Alternatively, neural responses to  
709 multiple letters might be more predictable from single letters at the fovea but not in the  
710 periphery. Both possibilities would predict reduced recognition with closely spaced  
711 flankers. Distinguishing these possibilities will require testing neural responses in  
712 higher visual areas to single letters and multi-letter strings of both familiar and  
713 unfamiliar scripts. Ultimately understanding reading fully will require not only asking  
714 how letters combine to form words, but how words combine to form larger units of  
715 meaning (Pallier et al., 2011; Nelson et al., 2017).

716



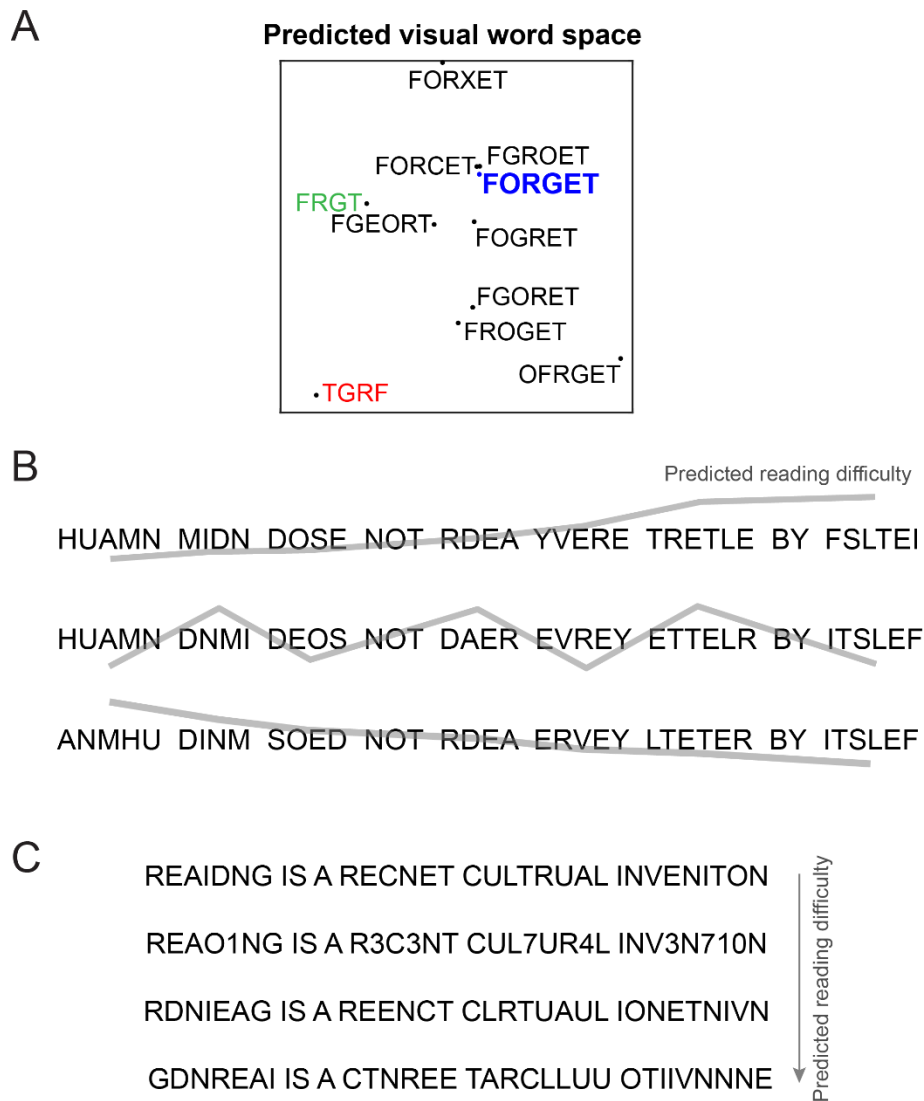

717  
718  
719  
720  
721  
722  
723  
724  
725  
726  
727  
728  
729  
730  
731  
732  
733  
734  
735  
736

**Figure 6. Predicting reading difficulty using the letter model**

- (A) Visual word space predicted by the letter model for a word (FORGET) and its jumbled versions. Letter model predictions were based on training the model on compound words (Experiment 4). The plot was obtained by performing multidimensional scaling on the pairwise dissimilarities between strings predicted by the letter model. It can be seen that classic features of orthographic processing are captured by the letter model, including priming effects such as FRGT (*green*) being more similar to FORGET than TGRF (*red*).
- (B) The letter model can be used to sort jumbled words by their reading difficulty, allowing us to create any desired reading difficulty profile along a sentence. *Top row*: Sentence with increasing reading difficulty. *Middle row*: sentence with fluctuating reading difficulty. *Bottom row*: sentence with decreasing reading difficulty.
- (C) The letter model yields a composite measure of reading difficulty that combines letter substitution and transposition effects. Sentences with digit substitutions (*second row*) can thus be placed along a continuum of reading difficulty relative to other sentences (*first, third and fourth rows*) with increasing degree of scrambling.

737

## METHODS

738 All subjects had normal or corrected-to-normal vision and gave informed  
739 consent to an experimental protocol approved by the Institutional Human Ethics  
740 Committee of the Indian Institute of Science. All subjects were fluent English-speaking  
741 students at the institute, where English is the medium of instruction. All subjects were  
742 multi-lingual and knew at least one other Indian language apart from English.

743

### 744 **Experiment 1 – Single letter searches**

745 *Procedure.* A total of 16 subjects (8 males,  $24.4 \pm 2.5$  years) participated in this  
746 experiment. Subjects were seated comfortably in front of a computer monitor placed  
747 ~60 cm away under the control of custom programs written in Psychtoolbox (Brainard,  
748 1997) and MATLAB. In all experiments, we selected sample sizes based on our  
749 previous studies which yielded highly consistent data (Agrawal et al., 2019).

750 *Stimuli.* Single letter images were created using the Arial font. There were 62 stimuli  
751 in all comprising 26 uppercase letters (A-Z), 26 lowercase letters (a-z), and 10 digits  
752 (0-9). Uppercase stimuli were scaled to have a height of  $1^\circ$ .

753 *Task.* Subjects were asked to perform an oddball search task without any constraints  
754 on eye movements. Each trial began with a fixation cross shown for 0.5 s followed by  
755 a 4x4 search array (measuring  $40^\circ$  by  $25^\circ$ ). The search array always contained only  
756 one oddball target with 15 identical distractors. Subject were instructed to locate the  
757 oddball target as quickly and as accurately as possible, and respond with a key press  
758 ('Z' for left, 'M' for right). A red line divided the screen in two halves. The search display  
759 was turned off after the response or after 10 seconds, whichever was sooner. All  
760 stimuli were presented in white against a black background. Incorrect or missed trials

761 were repeated after a random number of other trials. Subjects completed a total of  
762 3,782 correct trials ( ${}^{62}C_2$  letter pairs x 2 repetitions with either letter as target once).  
763 For each search pair, the oddball target appeared equally often on the left and right  
764 sides so as to avoid creating any response bias. Only correct responses were  
765 considered for further analysis. The main experiment was preceded by 20 practice  
766 trials involving unrelated stimuli.

767 *Data Analysis.* Subjects were highly accurate on this task (mean  $\pm$  std:  $98 \pm 1\%$ ).  
768 Outliers in the reaction times were removed using built-in routines in MATLAB (*isoutlier*  
769 function, MATLAB R2018a). This function removes any value greater than three  
770 scaled absolute deviations away from the median, and was applied to each search  
771 pair separately. This step removed 6.8% of the response time data.

772

### 773 **Estimation of single letter tuning using multidimensional scaling**

774 To estimate neural responses to single letters from the visual search data, we  
775 used a multidimensional scaling (MDS) analysis. We first calculated the average  
776 search time for each letter pair by averaging across subjects and trials. We then  
777 converted this search time (RT) into a distance measure by taking its reciprocal ( $1/RT$ ).  
778 This is a meaningful measure because it represents the underlying rate of evidence  
779 accumulation in visual search (Sunder and Arun, 2016), behaves like a mathematical  
780 distance metric (Arun, 2012) and combines linearly with a variety of factors (Prمود  
781 and Arun, 2014, 2016; Sunder and Arun, 2016). Next we took all pairwise distances  
782 between letters and performed MDS to embed letters into  $n$  dimensions, where we  
783 varied  $n$  from 1 to 15. This yielded  $n$ -dimensional coordinates corresponding to each  
784 letter, whose distances matched best with the observed distances. We then took the

785 activation of each letter along a given dimension as the response of a single neuron.  
786 Throughout we performed MDS embedding into 10 dimensions, resulting in single  
787 letter responses of 10 neurons. We obtained qualitatively similar results on varying  
788 this number of dimensions.

789

### 790 **Estimation of data reliability**

791 To obtain upper bounds on model performance, we reasoned that any model  
792 can predict the data as well as the consistency of the data itself. Thus, a model trained  
793 on one half of the subjects can only predict the other half as well as the split-half  
794 correlation  $r_{sh}$ . This process was repeated 100 times to obtain the mean and standard  
795 deviation of the split-half correlation. However when a model is trained on all the data,  
796 the upper bound will be larger than the split-half correlation. We obtained this upper  
797 bound, which represents the reliability of the entire dataset ( $r_{data}$ ) by applying a  
798 Spearman-Brown correction on the split-half correlation, as given by  $r_{data} = 2r_{sh}/(r_{sh}+1)$ .

799

### 800 **Experiment 2 – Bigram searches**

801 A total of 8 subjects (5 male, aged  $25.6 \pm 2.9$  years) took part in this experiment.  
802 We chose seven uppercase letters (A, D, H, I, M, N, T) and combined them in all  
803 possible ways to obtain 49 bigram stimuli. These letters were chosen to maximise the  
804 number of two-letter words e.g. HI, IT, IN, AN, AM, AT, AD, AH, and HA. Letters  
805 measured  $3^\circ$  along the longer dimension. Subjects completed 2352 correct trials ( $^{49}C_2$   
806 search pairs x 2 repetitions). All other details were identical to Experiment 1.  
807 Letter/Bigram frequencies were obtained from an online database  
808 (<http://norvig.com/mayzner.html>).

809 *Data Analysis.* Subjects were highly accurate on this task (mean  $\pm$  std:  $97.6 \pm 1.8\%$ ).  
810 Outliers in the reaction times were removed using built-in routines in MATLAB (*isoutlier*  
811 function, MATLAB R2018a). This step removed 8% of the response time data.

812

### 813 **Estimating letter model parameters from observed dissimilarities**

814 The total dissimilarity between two bigrams in the letter model is calculated by  
815 calculating the average dissimilarity across all neurons. For each neuron, the  
816 dissimilarity between bigrams AB & CD is given by:

$$817 \quad d(AB, CD) = |r_{AB} - r_{CD}| = |(w_1 r_A + w_2 r_B) - (w_1 r_C + w_2 r_D)|$$

818 where  $r_A, r_B, r_C$  and  $r_D$  are the responses of the neuron to individual letters A, B,  
819 C and D respectively (derived from single letter dissimilarities), and  $w_1, w_2$  are the  
820 spatial summation weights for the first and second letters of the bigram. Note that  
821  $w_1, w_2$  are the only free parameters for each neuron.

822 To estimate the spatial weights of each neuron, we adjusted them so as to  
823 minimize the squared error between the observed and predicted dissimilarity. This  
824 adjustment was done using standard gradient descent methods starting from randomly  
825 initialized weights (*nlinfit* function, MATLAB R2018a). We followed a similar approach  
826 for experiments involving longer strings.

827

### 828 **Experiment 3 – Upright and inverted bigrams**

829 *Methods.* A total of 8 subjects (6 males, aged  $24 \pm 1.5$  years) participated in this  
830 experiment. Six uppercase letters: A, L, N, R, S, and T were combined in all pairs to  
831 form a total of 36 stimuli. These uppercase letters were chosen because their images

832 change when inverted (as opposed to letters like H that are unaffected by inversion),  
833 and were chosen to maximize the occurrence of frequent bigrams. The same stimuli  
834 were inverted to create another set of 36 stimuli. Detailed analyses for this experiment  
835 are presented in Section S2.

836

#### 837 **Experiment 4 – Compound words**

838 A total of 8 subjects (4 female, aged  $25 \pm 2.5$  years) participated. Twelve 3-  
839 letter words were chosen: ANY, FOR, TAR, KEY, SUN, TEA, ONE, MAT, GET, PAD,  
840 DAY, POT. Each word was jumbled to obtain twelve 3-letter nonwords containing the  
841 same letters. The 12 words were combined to form 36 compound words (shown in  
842 Section S3), such that they appeared equally on the left and right half of the compound  
843 words. Detailed analyses for this experiment are included in Section S3.

844 *Calculation of orthographic Levenshtein distance:* For each search pair, we estimated  
845 the OLD metric using built-in MATLAB function “editdistance”. This function estimates  
846 the number of insertions, deletions, or substitutions are required to convert one string  
847 to other. In this study, the substitution cost has a value of 2. We obtained qualitatively  
848 similar results with other choices of substitution cost.

849

#### 850 **Experiment 5 – Lexical decision task**

851 *Procedure.* A total of 16 subjects (9 male, aged  $24.8 \pm 2.1$  years) participated in this  
852 task as well as the jumbled word task.

853 *Stimuli.* The stimuli comprised 450 words + 450 nonwords. The nonwords were either  
854 random strings or made by modifying the 450 words in some way, as detailed in the  
855 table below.

|    | Variations of word ABCDE                                       | 4 letter words | 5 letter words | 6 letter words | Total |
|----|----------------------------------------------------------------|----------------|----------------|----------------|-------|
| 1) | <i>Edge transpositions: BACDE or ABCED</i>                     | 15             | 15             | 20             | 50    |
| 2) | <i>Middle transposition: ACBDE or ABDCE</i>                    | 15             | 15             | 20             | 50    |
| 3) | <i>2 step edge transposition: CBADE or ABEDC</i>               | 0              | 20             | 30             | 50    |
| 4) | <i>2 step middle transposition: ADCBE</i>                      | 0              | 20             | 30             | 50    |
| 5) | <i>Random transposition: CDABE, ACDBE, etc.</i>                | 25             | 35             | 40             | 100   |
| 6) | <i>Edge Substitution: MZCDE or ABCMZ</i>                       | 15             | 15             | 20             | 50    |
| 7) | <i>Middle Substitution: ABMZE</i>                              | 15             | 15             | 20             | 50    |
| 8) | <i>Random substitution and permutation: MACZE, AMDEZ, etc.</i> | 15             | 15             | 20             | 50    |
|    | Total                                                          | 100            | 150            | 200            | 450   |

856 **Table 1: Non-word stimuli in lexical decision task (Experiment 5).**

857

858 *Task.* Each trial began a fixation cross shown for 0.75 s followed by a letter string for  
859 0.2 s after which the screen went blank. The trial ended either with the subject's  
860 response or after at most 3 s. Subjects were instructed to press 'Z' for words and 'M'  
861 for nonwords as quickly and accurately as possible. All stimuli were presented at the  
862 centre of the screen and were white letters against a black background. Before starting  
863 the main task, subjects were given 20 practice trials using other words and nonwords  
864 not included in the main experiment.

865

866 *Data Analysis.* Some nonwords were removed from further analysis due to low  
867 accuracy ( $n = 8$ , average accuracy  $< 20\%$ ). Subjects made accurate responses for both  
868 words and nonwords (mean  $\pm$  std of accuracy:  $96 \pm 2\%$  for words,  $95 \pm 3\%$  for  
869 nonwords). Outliers in the reaction times were removed using built-in routines in  
870 MATLAB (*isoutlier* function, MATLAB R2018a).

871

872

873

874

875

## 876 **Experiment 6 (Lexical Decision Task – fMRI)**

877 A total of 17 subjects (10 males,  $25 \pm 4.2$  years) participated in this experiment.

878 All subjects were screened for safety and comfort beforehand to avoid adverse  
879 outcomes in the scanner.

880 *Stimuli:* The functional localizer block included English words, objects, scrambled  
881 words, and scrambled objects. In each run, 14 images were randomly selected from  
882 a pool of images. The English words list comprised of 90 five-letter words. Each word  
883 was divided into grids of dimension 9x3. Scrambled words were generated by  
884 randomly shuffling the grids. Object pool comprised of 80 man-made objects. To  
885 generate scrambled objects, the phase of the Fourier transformed images was  
886 scrambled and then reconstructed back using inverse Fourier transform. The object  
887 images were about  $4.5^\circ$  along the longer dimension and the height of the word stimuli  
888 subtended  $2^\circ$  of visual angle.

889 The event block consisted of 10 single letters and 64 five-letter strings (32  
890 words and 32 nonwords formed using these single letters). The stimulus set comprised  
891 of 64 five-letter words and nonwords. The words were chosen from a wide range of  
892 frequency of occurrence and the nonwords were created by manipulating the chosen  
893 words i.e. They were: 1) 8-middle transposed version of words, 2) 8-edge transposed  
894 version of words, 3) 8-middle substituted version of words, and 4) 8-edge substituted  
895 version of words. The stimuli subtended  $2^\circ$  in height, which was the same as in the  
896 localizer block. All stimuli were presented as white against a black background.

897 *Procedure:* In the localizer block, a total of 16 images were presented for 0.8 s with an  
898 inter stimulus interval of 0.2 s. There were 14 unique stimuli and 2 of them repeated  
899 at random time point, in which subjects performed one-back task. Each block ended



900 with a blank screen with fixation cross present for 4 s. Thus, each block lasted 20 s.  
901 Each block was repeated thrice in each run.

902 In the event-related design block, an image was presented at the centre of the  
903 screen for 300ms followed by 3.7s of blank screen with a fixation cross. In a run, all  
904 74 stimuli were presented once along with 16 trials of fixation cross to jitter inter  
905 stimulus interval. Hence there were a total of 92 trials including 4s fixation trials at the  
906 start and end of each run. Each run lasted 376 s. Subjects performed lexical decision  
907 task only on strings and were instructed to not press any key for single letters. Overall,  
908 subjects completed 2 runs of localizer block, 8 runs of event block and a structural  
909 scan block.

910 *Data acquisition:* Subjects viewed images in a mirror-based projection system.  
911 Functional MRI data was acquired using a 32-channel head coil on a 3T Siemens  
912 Skyra scanner at HealthCare Global Hospital, Bengaluru. Functional scans were  
913 performed using a T2\*-weighted gradient-echo-planar imaging sequence with the  
914 following parameters: TR = 2s, TE = 28ms, flip angle = 79°, voxel size = 3x3x3 mm<sup>3</sup>,  
915 field of view = 192x192 mm<sup>2</sup>, and 33 axial-oblique slices covering the whole brain.  
916 Anatomical scans were performed using T1-weighted images with the following  
917 parameters: TR = 2.30s, TE = 1.99ms, flip angle = 9°, voxel size = 1x1x1 mm<sup>3</sup>, field  
918 of view = 256x256x176 mm<sup>3</sup>.

919 *Data preprocessing:* All raw fMRI data were processed using custom built MATLAB  
920 scripts that depended on SPM 12 toolbox  
921 (<https://www.fil.ion.ucl.ac.uk/spm/software/spm12/>). Raw images were realigned,  
922 slice-time corrected, co-registered with the anatomical image, segmented, and finally  
923 normalized to the MNI305 anatomical template. The results were qualitatively similar

924 without normalization. Smoothing operation was performed only on functional localizer  
925 blocks using a Gaussian kernel with FWHM of 5 mm. All SPM parameters were set to  
926 default and the voxel size after normalization was set to 3x3x3 mm<sup>3</sup>. Prior to  
927 normalization, the data was preprocessed using GLMdenoise v1.4 (Kay et al., 2013).  
928 This step improved the signal-to-noise ratio in the data by regressing out the noise  
929 pattern common across all the voxels in the brain. The noise pattern is estimated from  
930 voxels unrelated to the task. The activity corresponding to each condition was  
931 estimated by modelling the denoised data using a generalized linear model (GLM) in  
932 SPM after removing the low frequency drift using a high-pass filter with a cutoff at  
933 128s. The event block data was modelled using 89 regressors (74 stimuli + 1 fixation  
934 + 6 motion regressors + 8 runs). The localizer block data was modelled using 13  
935 regressors (4 stimuli + 1 fixation + 6 motion regressors + 2 runs).

936 *ROI definitions:* All the regions of interest (ROI) were defined using functional localizer  
937 while taking the anatomical location into consideration. Early visual area was defined  
938 as the region that responds more to the scrambled object than fixation cross. This  
939 functional region was further parsed into V1-V3 and V4 using an anatomical mask  
940 from SPM anatomy toolbox (Eickhoff et al., 2005). Lateral Occipital (LO) region was  
941 defined as a group of voxels that responded more to objects than scrambled objects.  
942 The voxels in the LO region was restricted to Inferior Temporal Gyrus, Inferior Occipital  
943 Gyrus, and Middle Occipital Gyrus. These anatomical regions were obtained from  
944 Tissue Probability Map (TPM) labels in SPM 12. Visual Word Form Area (VWFA) was  
945 defined as a region that responded more for words than scrambled words within  
946 fusiform Gyrus. The activity for known words was also higher in Superior and Middle  
947 Temporal regions. These groups of voxels were grouped under Temporal Gyrus (TG)  
948 label. For each contrast, voxel-level threshold of  $p < 0.001$  (uncorrected) or cluster

949 level threshold  $p < 0.05$  (FWE correction) was used to obtain a contiguous region. For  
950 one subject, very few VWFA voxels cross the pre-specified threshold. Hence, the  
951 threshold was lowered to  $p = 0.1$  (uncorrected). The VWFA voxels were restricted to  
952 top-40 voxels (based on T-value in the function localizer contrast). All these regions  
953 were visualized on the cortical surface using BSPMVIEW toolbox  
954 (<http://www.bobspunt.com/bspmview/>).

955

956 *Calculation of neural dissimilarity (fMRI).* For each ROI and subject, the pair-wise  
957 dissimilarity between any two image pairs was computed using the cross-validated  
958 Mahalanobis distance in the RSA toolbox (Nili et al., 2014). Outliers in dissimilarity  
959 values across subjects were removed using built-in routines in MATLAB (*isoutlier*  
960 function, MATLAB R2018a). The median dissimilarity across all the subjects was  
961 considered for further analysis. We obtained qualitatively similar results for other  
962 distance measures.

963

964 *Calculation of semantic dissimilarity.* The semantic distance between every pair of  
965 words was computed as the cosine distance between the GloVe (Pennington et al.,  
966 2014) feature vectors activated by the two words, using the MATLAB function  
967 *word2vec*. These features are based on the co-occurrence statistics of words in a large  
968 text corpus, and therefore reflect semantic dissimilarity rather than visual dissimilarity.

969

## 970 **Experiment 7 (5-letter string searches)**

971 A total of 11 subjects (6 males,  $26 \pm 2.7$  years) participated in this experiment,  
972 of which xx also participated in Experiment 6. Stimuli were identical to Experiment 6,

973 except that they were scaled down to a height of  $1^\circ$  to allow placement in a visual  
974 search array. Subjects performed a total of 2048 correct trials ( $^{32}C_2$  search pairs x 2  
975 conditions (words and nonwords) + 32 word-nonword pairs x 2 repetitions). All trials  
976 were interleaved, and incorrect/missed trials appeared randomly later in the task but  
977 were not analyzed. All other details were identical to Experiment 1.

978

979 *Data Analysis.* Subjects were highly accurate on this task (mean  $\pm$  std:  $98.6 \pm 1\%$ ).  
980 Outliers in the reaction times were removed using built-in routines in MATLAB (*isoutlier*  
981 function, MATLAB R2018a). This step removed 7% of the response time data.

## REFERENCES

- 982  
983 Agrawal A, Hari KVS, Arun SP (2019) Reading Increases the Compositionality of  
984 Visual Word Representations. *Psychol Sci* 30:1707–1723.
- 985 Arun SP (2012) Turning visual search time on its head. *Vision Res* 74:86–92.
- 986 Baeck A, Kravitz D, Baker C, Op de Beeck HP (2015) Influence of lexical status and  
987 orthographic similarity on the multi-voxel response of the visual word form area.  
988 *Neuroimage* 111:321–328.
- 989 Bao P, Tsao DY (2018) Representation of multiple objects in macaque category-  
990 selective areas. *Nat Commun* 9:1774.
- 991 Brainard DH (1997) The Psychophysics Toolbox. *Spat Vis* 10:433–436.
- 992 Chanceaux M, Grainger J (2012) Serial position effects in the identification of letters,  
993 digits, symbols, and shapes in peripheral vision. *Acta Psychol (Amst)* 141:149–  
994 158.
- 995 Davis CJ (2010) The spatial coding model of visual word identification. *Psychol Rev*  
996 117:713–758.
- 997 Dehaene S, Cohen L, Morais J, Kolinsky R (2015) Illiterate to literate: behavioural  
998 and cerebral changes induced by reading acquisition. *Nat Rev Neurosci*  
999 16:234–244.
- 1000 Dehaene S, Cohen L, Sigman M, Vinckier F (2005) The neural code for written  
1001 words: a proposal. *Trends Cogn Sci* 9:335–341.
- 1002 Dehaene S, Pegado F, Braga LW, Ventura P, Nunes Filho G, Jobert A, Dehaene-  
1003 Lambertz G, Kolinsky R, Morais J, Cohen L (2010) How learning to read  
1004 changes the cortical networks for vision and language. *Science (80- )* 330:1359–  
1005 1364.
- 1006 Dufau S, Grainger J, Ziegler JC (2012) How to say “No” to a nonword: A leaky  
1007 competing accumulator model of lexical decision. *J Exp Psychol Learn Mem*  
1008 Cogn 38:1117–1128.
- 1009 Eickhoff SB, Stephan KE, Mohlberg H, Grefkes C, Fink GR, Amunts K, Zilles K  
1010 (2005) A new SPM toolbox for combining probabilistic cytoarchitectonic maps  
1011 and functional imaging data. *Neuroimage* 25:1325–1335.
- 1012 Ghose GM, Maunsell JH (2008) Spatial summation can explain the attentional  
1013 modulation of neuronal responses to multiple stimuli in area v4. *J Neurosci*  
1014 28:5115–5126.
- 1015 Gomez P, Ratcliff R, Perea M (2008) The overlap model: a model of letter position  
1016 coding. *Psychol Rev* 115:577–600.
- 1017 Grainger J (2018) Orthographic processing: A ‘mid-level’ vision of reading: The 44th  
1018 Sir Frederic Bartlett Lecture. *Q J Exp Psychol* 71:335–359.
- 1019 Grainger J, Dufau S, Montant M, Ziegler JC, Fagot J (2012) Orthographic processing  
1020 in baboons (*Papio papio*). *Science (80- )* 336:245–248.
- 1021 Grainger J, Whitney C (2004) Does the huamn mnid raed wrods as a wlohe? *Trends*  
1022 *Cogn Sci* 8:58–59.
- 1023 Kay KN, Rokem A, Winawer J, Dougherty RF, Wandell BA (2013) GLMdenoise: A  
1024 fast, automated technique for denoising task-based fMRI data. *Front Neurosci*  
1025 7:1–15.
- 1026 Kronbichler M, Hutzler F, Wimmer H, Mair A, Staffen W, Ladurner G (2004) The  
1027 visual word form area and the frequency with which words are encountered:  
1028 evidence from a parametric fMRI study. *Neuroimage* 21:946–953.
- 1029 Lehky SR, Tanaka K (2016) Neural representation for object recognition in  
1030 inferotemporal cortex. *Curr Opin Neurobiol* 37:23–35.
- 1031 Marcet A, Perea M (2017) Is nevtral NEUTRAL? Visual similarity effects in the early

- 1032 phases of written-word recognition. *Psychon Bull Rev* 24:1180–1185.
- 1033 McClelland JL, Rumelhart DE (1981) An interactive activation model of context  
1034 effects in letter perception: I. An account of basic findings. *Psychol Rev* 88:375–  
1035 407.
- 1036 Mruczek REB, Sheinberg DL (2005) Distractor familiarity leads to more efficient  
1037 visual search for complex stimuli. *Percept Psychophys* 67:1016–1031.
- 1038 Nelson MJ, El Karoui I, Giber K, Yang X, Cohen L, Koopman H, Cash SS, Naccache  
1039 L, Hale JT, Pallier C, Dehaene S (2017) Neurophysiological dynamics of  
1040 phrase-structure building during sentence processing. *Proc Natl Acad  
1041 Sci*:201701590.
- 1042 Nili H, Wingfield C, Walther A, Su L, Marslen-Wilson W, Kriegeskorte N (2014) A  
1043 toolbox for representational similarity analysis. *PLoS Comput Biol* 10:e1003553.
- 1044 Norris D (2013) Models of visual word recognition. *Trends Cogn Sci* 17:517–524.
- 1045 Norris D, Kinoshita S (2012) Reading through a noisy channel: why there's nothing  
1046 special about the perception of orthography. *Psychol Rev* 119:517–545.
- 1047 Op de Beeck H, Wagemans J, Vogels R (2001) Inferotemporal neurons represent  
1048 low-dimensional configurations of parameterized shapes. *Nat Neurosci* 4:1244–  
1049 1252.
- 1050 Pallier C, Devauchelle A-D, Dehaene S (2011) Cortical representation of the  
1051 constituent structure of sentences. *Proc Natl Acad Sci U S A* 108:2522–2527.
- 1052 Pelli DG, Tillman K a (2008) The uncrowded window of object recognition. *Nat  
1053 Neurosci* 11:1129–1135.
- 1054 Pelli DG, Tillman KA (2007) Parts, wholes and context in reading: A triple  
1055 dissociation. *PLoS One* 2:e680.
- 1056 Pennington J, Socher R, Manning CD (2014) GloVe: Global Vectors for Word  
1057 Representation. In: *Empirical Methods in Natural Language Processing  
1058 (EMNLP)*, pp 1532–1543.
- 1059 Perea M, Duñabeitia JA, Carreiras M (2008) R34D1NG W0RD5 W1TH NUMB3R5. *J  
1060 Exp Psychol Hum Percept Perform* 34:237–241.
- 1061 Perea M, Panadero V (2014) Does viotin activate violin more than viocin? On the  
1062 use of visual cues during visual-word recognition. *Exp Psychol* 61:23–29.
- 1063 Pramod RT, Arun SP (2014) Features in visual search combine linearly. *J Vis* 14:1–  
1064 20.
- 1065 Pramod RT, Arun SP (2016) Object attributes combine additively in visual search. *J  
1066 Vis* 16:8.
- 1067 Pramod RT, Arun SP (2018) Symmetric Objects Become Special in Perception  
1068 Because of Generic Computations in Neurons. *Psychol Sci* 29:95–109.
- 1069 Ratan Murty NA, Arun SP (2015) Dynamics of 3D view invariance in monkey  
1070 inferotemporal cortex. *J Neurophysiol* 113:2180–2194.
- 1071 Ratcliff R, Gomez P, McKoon G (2004) A diffusion model account of the lexical  
1072 decision task. *Psychol Rev* 111:159–182.
- 1073 Ratcliff R, McKoon G (2008) The Diffusion Decision Model: Theory and Data for  
1074 Two-Choice Decision Tasks. *Neural Comput* 20:873–922.
- 1075 Rawlinson GE (1976) The significance of letter position in word recognition.
- 1076 Rayner K (1998) Eye movements in reading and information processing: 20 years of  
1077 research. *Psychol Bull* 124:372–422.
- 1078 Rayner K, White SJ, Johnson RL, Liversedge SP (2006) Raeding wrods with  
1079 jubmled lettres: There is a cost. *Psychol Sci* 17:192–193.
- 1080 Rumelhart DE, McClelland JL (1982) An interactive activation model of context  
1081 effects in letter perception: Part 2. The contextual enhancement effect and some



- 1082 tests and extensions of the model. *Psychol Rev* 89:60–94.
- 1083 Scaltritti M, Dufau S, Grainger J (2018) Stimulus orientation and the first-letter  
1084 advantage. *Acta Psychol (Amst)* 183:37–42.
- 1085 Sripati AP, Olson CR (2010a) Global Image Dissimilarity in Macaque Inferotemporal  
1086 Cortex Predicts Human Visual Search Efficiency. *J Neurosci* 30:1258–1269.
- 1087 Sripati AP, Olson CR (2010b) Responses to compound objects in monkey  
1088 inferotemporal cortex: the whole is equal to the sum of the discrete parts. *J*  
1089 *Neurosci* 30:7948–7960.
- 1090 Sunder S, Arun SP (2016) Look before you seek: Preview adds a fixed benefit to all  
1091 searches. *J Vis* 16:3.
- 1092 Vighneshvel T, Arun SP (2015) Coding of relative size in monkey inferotemporal  
1093 cortex. *J Neurophysiol* 113:2173–2179.
- 1094 Vinckier F, Dehaene S, Jobert A, Dubus JP, Sigman M, Cohen L (2007) Hierarchical  
1095 Coding of Letter Strings in the Ventral Stream: Dissecting the Inner Organization  
1096 of the Visual Word-Form System. *Neuron* 55:143–156.
- 1097 Yap MJ, Sibley DE, Balota DA, Ratcliff R, Rueckl J (2015) Responding to nonwords  
1098 in the lexical decision task: Insights from the english Lexicon project. *J Exp*  
1099 *Psychol Learn Mem Cogn* 41:597–613.
- 1100 Yarkoni T, Balota D, Yap M (2008) Moving beyond Coltheart’s N: a new measure of  
1101 orthographic similarity. *Psychon Bull Rev* 15:971–979.
- 1102 Zhivago KA, Arun SP (2014) Texture discriminability in monkey inferotemporal cortex  
1103 predicts human texture perception. *J Neurophysiol* 112:2745–2755.
- 1104 Ziegler JC, Hannagan T, Dufau S, Montant M, Fagot J, Grainger J (2013)  
1105 Transposed-Letter Effects Reveal Orthographic Processing in Baboons. *Psychol*  
1106 *Sci* 24:1609–1611.
- 1107 Zoccolan D, Cox DD, DiCarlo JJ (2005) Multiple Object Response Normalization in  
1108 Monkey Inferotemporal Cortex. *J Neurosci* 25:8150–8164.
- 1109 Zorzi M, Barbiero C, Facoetti A, Lonciari I, Carrozzi M, Montico M, Bravar L, George  
1110 F, Pech-Georgel C, Ziegler JC (2012) Extra-large letter spacing improves  
1111 reading in dyslexia. *Proc Natl Acad Sci U S A* 109:11455–11459.

1112

## 1113 **ACKNOWLEDGEMENTS**

1114 **Funding.** This research study was funded by Intermediate & Senior Fellowships  
1115 (Grant Numbers 500027/Z/09/Z and IA/S/17/1/503081) from the Wellcome Trust/DBT  
1116 India Alliance and the DBT-IISc partnership program (to SPA).

1117 **Author contributions.** AA, KVSH & SPA designed experiments; AA collected data;  
1118 AA & SPA analysed and interpreted the data; SPA wrote the manuscript with inputs  
1119 from AA & KVSH.

1120 **Competing interests.** The authors declare no competing interests.

1121 **Data and code availability.** Data and code necessary to reproduce the results are  
1122 available at <https://osf.io/384zw/>

1123

1 **APPENDIX**

2  
3 **For**

4 **A compositional letter code in high-level visual cortex**  
5 **explains how we read jumbled words**  
6

7  
8  
9 **CONTENTS**

10 **Section A1. Additional analyses for Experiment 1 (single letters)**  
11 **Section A2. Upright and inverted bigrams and trigrams (Expts 3 & S1)**  
12 **Section A3. Compound words (Experiment 4)**  
13 **Section A4. Experiments with longer strings (Expts S2-S5)**  
14 **Section A5. Estimating letter dissimilarities from bigram dissimilarities**  
15 **Section A6. Jumbled word reading (Expt S6)**  
16 **Section A7. Additional analyses for Experiment 5 (lexical task)**  
17 **Section A8. Additional analyses for LDT fMRI (Expts 6-7)**  
18 **References**  
19



20  
21  
22  
23  
24  
25  
26  
27  
28  
29  
30  
31  
32  
33  
34  
35  
36  
37  
38  
39  
40  
41

## SECTION A1. ADDITIONAL ANALYSIS FOR EXPERIMENT 1

The results in the main text were presented for uppercase English letters (Figure 2), but in Experiment 1 we also collected visual search data for all pairs of English letters and numbers ( $n = 62$  characters in all, comprising 26 uppercase + 26 lowercase + 10 numbers). We did so in order to predict the visual dissimilarity between letter strings containing both mixed case letters as well as numbers.

To visualize the dissimilarity relations between the 62 characters used, we performed multidimensional scaling. In the resulting plot (Figure S1A), nearby characters represent hard searches. A number of interesting patterns can be seen: letters like C, G, Q, O are nearby which is expected given their shared curvatures. Letter pairs such as (M,W) and number pairs such as (6,9) are similar due to mirror confusion (Vighneshvel and Arun, 2013).

Next, we investigated the degree to which the observed pairwise dissimilarities are captured by the multidimensional embedding as a function of the number of dimensions. In the resulting plot (Figure S1B), it can be seen that nearly 89% of the variance is captured by 10 dimensions as before, which reaches roughly the reliability of the dissimilarity data itself. For the analyses involving mixed case searches or fewer searches, we took a total of 6 neurons for the letter model, which explain 87.7% of the variance in the pairwise dissimilarities.

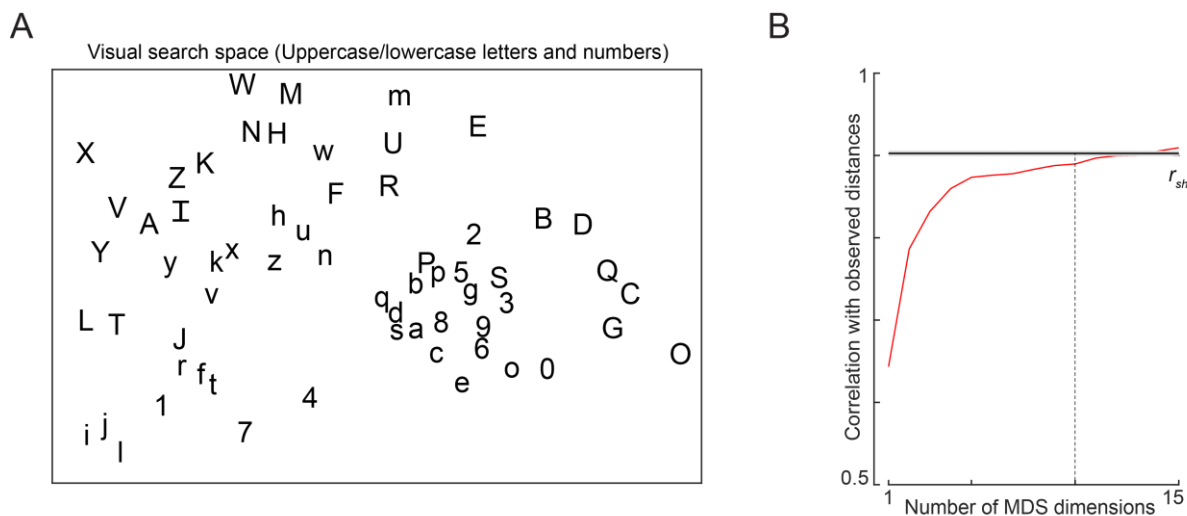

42  
43  
44  
45  
46  
47  
48  
49  
50  
51  
52  
53  
54  
55  
56

### Figure S1. Visual search space for letters and digits

(A) Visual search space for letters (uppercase and lowercase) and digits obtained by multidimensional scaling of observed dissimilarities. Nearby letters represent hard searches. Distances in this 2D plot are highly correlated with the observed distances ( $r = 0.79$ ,  $p < 0.00005$ ).

(B) Correlation between observed distances and MDS embedding as a function of number of MDS dimensions. The horizontal line represents the split-half correlation with error bars representing s.d calculated across 100 random splits.

### Can letter dissimilarity be predicted using low-level visual features?

To investigate whether single letter dissimilarity can be predicted using low-level visual features, we attempted to predict letter dissimilarities using two models. In the first model, which we call the pixel model, we calculated the dissimilarity between letters to be the absolute difference in pixel intensities between the images of the two

57 letters. This pixel-based model showed a significant correlation ( $r = 0.50$ ,  $p < 0.00005$ )  
58 but was far from the reliability of the data itself ( $r_{sh} = 0.90$ ; Figure S1B). In the second  
59 model, we calculated the dissimilarity between two letters as the vector distance  
60 between the responses evoked by a population of simulated V1 neurons (Ratan Murty  
61 and Arun, 2015). This V1 model also showed a significant correlation ( $r = 0.44$ ,  $p <$   
62  $0.00005$ ) but again far from the reliability of the data itself). We conclude that single  
63 letter dissimilarity can only be partially predicted by low-level visual features.

64

### 65 **Is visual search dissimilarity related to subjective dissimilarity?**

66 In this study, we have used visual search as a natural and objective measure  
67 for visual dissimilarity. However previous studies have measured letter dissimilarity  
68 either through confusions in letter recognition, or through subjective dissimilarity  
69 ratings (Mueller and Weidemann, 2012; Simpson et al., 2013). We have previously  
70 shown that subjective dissimilarity for abstract silhouettes is strongly correlated with  
71 visual search dissimilarity (Pramod and Arun, 2016). This may not hold for letters since  
72 subjects can activate letter representations that are modified through extensive  
73 familiarity. To investigate how visual search dissimilarity compares with subjective  
74 similarity ratings for letters, we compared search dissimilarities for uppercase letters  
75 against two sets of previously reported similarity data. First, we compared visual  
76 search dissimilarities with subjective dissimilarity ratings (Simpson et al., 2013). This  
77 revealed a significant positive correlation ( $r = 0.69$ ,  $p < 0.0005$ ). Second, we compared  
78 visual search dissimilarities with letter confusion data (3). To convert letter confusion  
79 response times, which are a measure of similarity, into dissimilarities, we took their  
80 reciprocals, and then compared them with visual search dissimilarities. This revealed  
81 a significant positive, albeit weaker correlation ( $r = 0.34$ ,  $p < 0.0005$ ).

82

83

## SECTION A2. UPRIGHT AND INVERTED BIGRAMS AND TRIGRAMS

---

84

85

86

87

88

89

90

91

92

It has been observed that readers are more sensitive to letter transpositions for letters of their familiar script. Since discrimination of letter transpositions in the letter model is a direct consequence of asymmetric spatial summation (main text, Figure 3), we predicted that readers should show more asymmetric spatial summation for familiar letters compared to unfamiliar letters. As a strong test of this prediction, we compared visual search performance on upright letters (which are highly familiar) with inverted letters (which are unfamiliar) across two experiments, one on bigrams and the other on trigrams.

93

94

95

96

97

The comparison of upright and inverted letter strings is also interesting for a second reason. If reading or familiarity with upright letters led to the formation of specialized detectors for longer strings, then we predict that the letter model (which assumes responses to be driven by single letters only) should yield worse fits for upright compared to inverted letters.

98

99

We tested the above two predictions in the following two experiments.

100

### Experiment 3: Upright vs inverted bigrams

101

102

103

104

105

106

107

108

109

110

*Methods.* A total of 8 subjects (6 males, aged  $24 \pm 1.5$  years) participated in this experiment. Six uppercase letters: A, L, N, R, S, and T were combined in all pairs to form a total of 36 stimuli. These uppercase letters were chosen because their images change when inverted (as opposed to letters like H that are unaffected by inversion), and were chosen to maximize the occurrence of frequent bigrams. The same stimuli were inverted to create another set of 36 stimuli. Stimuli subtended  $\sim 4^\circ$  along the longer dimension. Subjects performed all possible searches among the upright letters ( ${}^36C_2 = 630$  searches) with two repetitions and likewise for inverted letters. All trials were interleaved. All other details were exactly as in Experiment 2.

111

112

### Results

113

114

115

116

117

118

We observed interesting differences in search difficulty depending on the nature of the bigrams. This pattern is illustrated in Figure S2A-B. When the target and distractors consisted of repeated letters (e.g. TT among AA in Figure S2A), search is equally easy when the array is upright or inverted. In contrast if the target and distractors are transposed versions of each other (e.g. TA among AT in Figure S2B), search is easier in the upright array compared to when it is inverted.

119

120

121

122

123

124

125

126

127

128

To confirm that this effect is present across all such pairs, we compared observed response times for these two types of searches between upright and inverted conditions (Figure S2C). Response times for the AA-BB searches were comparable for upright and inverted conditions (mean  $\pm$  sd of RT:  $0.66 \pm 0.09$  s for upright,  $0.67 \pm 0.1$  s for inverted). To assess the statistical significance of this difference, we performed an ANOVA with subject (8 levels), bigram (15 pairs) and orientation (upright vs inverted) as factors. We observed no significant difference in the response times between upright and inverted conditions for AA-BB searches ( $p = 0.65$  for main effect of orientation;  $p < 0.00005$  for subject and bigram factors,  $p > 0.05$  for all interactions).

129

130

131

132

Next we compared transposed letter (AB-BA) searches. Here, subjects were clearly faster on the upright searches compared to inverted searches (mean  $\pm$  sd of RT:  $1.58 \pm 0.25$  s for upright,  $3.12 \pm 0.76$  s for inverted). This difference was statistically significant ( $p < 0.00005$  for main effect of orientation;  $p < 0.0005$  for subject and  $p <$

133 .05 for bigram factors,  $p < 0.05$  for interactions between pairs and orientation. Other  
134 interaction effects were not significant).

135 To compare bigram dissimilarity between upright and inverted bigrams, we  
136 plotted one against the other. This revealed a highly significant correlation ( $r = 0.80$ ,  $p$   
137  $< 0.00005$ ; Figure S2D). Here too it can be seen that the transposed letter searches  
138 are clearly faster when they are upright whereas the repeated letter searches show no  
139 such difference.

140 Thus, inversion slows down transposed letter searches but not repeated letter  
141 searches.

142

### 143 **Explaining upright and inverted bigram dissimilarity using the letter model**

144 We fit the letter model to both upright and inverted bigram searches using a  
145 total of 10 neurons with single letter responses derived from Experiment 1. The letter  
146 model yielded excellent fits on both upright and inverted bigrams. In both cases, the  
147 model fits approached the data consistency (Figure S2E), implying that the model  
148 explained nearly all the explainable variance in the data.

149 To compare these model fits for upright vs inverted statistically, we performed  
150 a bootstrap analysis. Each time, we selected subjects with replacement and fit the  
151 letter model to the average dissimilarity computed for this random pool of subjects.  
152 Each time we calculated a normalized correlation measure that takes into account the  
153 difference in data reliability between upright and inverted trigram searches. This  
154 normalized correlation is simply the model correlation divided by the data consistency.  
155 To assess statistical significance, we calculated the fraction of times the normalized  
156 correlation in the upright samples was larger than the inverted samples. This analysis  
157 revealed significant difference in model performance between upright and inverted  
158 searches, but in the opposite direction (average model correlation:  $r = 0.92$  for upright,  
159  $0.9$  for inverted; fraction of upright  $<$  inverted normalized model correlation:  $p = 0$ ).  
160 Thus, upright searches are more predictable than inverted searches using the letter  
161 model.

162 Next we asked whether the letter model can explain the intriguing observation  
163 that inversion affects transposed letter searches but not repeated letter searches. This  
164 is easy to explain in the letter model: The response to repeated letter bigrams such as  
165 AA is unaltered (Figure 3B), and therefore the dissimilarity between AA and TT is  
166 unaffected by the asymmetry in spatial summation. By contrast, the dissimilarity  
167 between transposed letter pairs like AT & TA is directly driven by the asymmetry in  
168 spatial summation. We also note that the search TT among AA is much easier than  
169 the search for TA among AT. This is also explained by the letter model by the fact that  
170 the response to repeated letters is the same as the response to individual letters,  
171 leaving their discrimination unaltered. By contrast transposed letters are much more  
172 similar since their neural responses are much closer (Figure 3B).

173 To be sure that letter model predictions show the same pattern, we plotted the  
174 average response time predicted by the letter model for repeated letter (AA-BB) and  
175 transposed letter (AB-BA) searches. To assess the statistical significance, we  
176 performed a sign-rank test on the predicted RT. The letter model predictions were  
177 exactly as expected (Figure S2F).

178 Next we analysed the model parameters in the letter model to ascertain whether  
179 the spatial summation in the neurons was indeed different for upright and inverted  
180 bigrams. To quantify the degree of asymmetry, we calculated for each neuron a spatial  
181 modulation index of the form  $MI = \text{abs}(w_1 - w_2) / (w_1 + w_2)$  where  $w_1$  and  $w_2$  are the  
182 estimated weights for each letter in the bigram. To avoid unnaturally large modulation

183 indices,  $w_1$  and  $w_2$  values smaller than 0.01 were set to 0.01. The spatial modulation  
 184 index for all 10 neurons for upright and inverted bigrams is shown in Figure S2G. It  
 185 can be seen that the modulation index is larger in most cases for the upright bigrams.  
 186 This difference was statistically significant, as assessed using a sign-rank test on the  
 187 spatial modulation indices (Figure S2H).  
 188  
 189

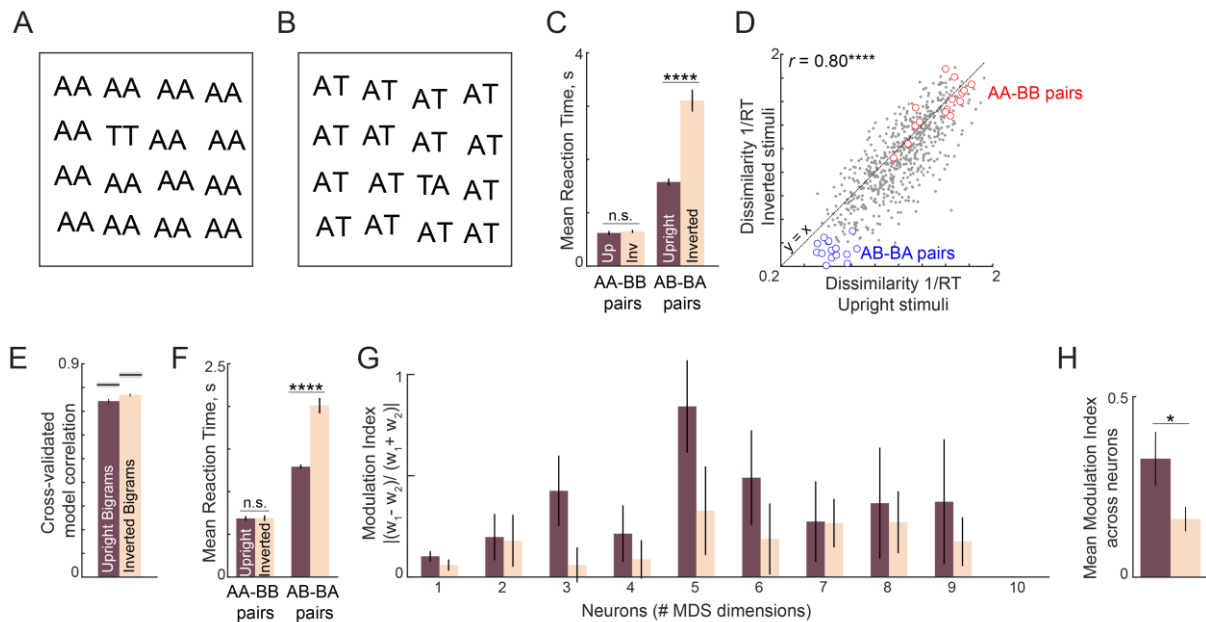

190  
 191  
 192  
 193  
 194  
 195  
 196  
 197  
 198  
 199  
 200  
 201  
 202  
 203  
 204  
 205  
 206  
 207  
 208  
 209  
 210  
 211  
 212  
 213  
 214

### Figure S2. Letter model fits for upright and inverted bigrams

- (A) Example oddball search array for a repeated letter target (TT) among identical repeated-letter distractors (AA). It can be seen that inverting this search array does not affect search difficulty.
- (B) Example oddball search array for transposed letters (TA among AT). It can be seen by inverting this search array makes the search substantially more difficult.
- (C) Average search times in the oddball search task for repeated-letter searches (AA-BB) and transposed letter (AB-BA) searches. Error bars represent s.e.m calculated across subjects. Asterisks represent statistical significance (\*\*\*\* is  $p < 0.00005$ ), as obtained using an ANOVA on the response times with subject, bigram and orientation as factors (see text).
- (D) Dissimilarity of inverted bigram pairs plotted against the dissimilarity of upright bigram pairs. Correlation is shown at the top left. Asterisks indicate statistical significance of the correlations (\*\*\*\* is  $p < 0.00005$ ).
- (E) Cross-validated model correlation of the letter model for upright bigrams and inverted bigrams. *Shaded gray bars* represent the upper bound achievable in each case given the consistency of the data, calculated using the split-half correlation  $r_{sh}$ .
- (F) Predicted RT from the letter model for repeated letter pairs and transposed letter pairs. Asterisks denote statistical significance as obtained using a sign-rank test on the predicted RTs between upright and inverted conditions.
- (G) Spatial modulation index for each neuron in the letter model for upright and inverted bigrams.



215 (H) Average spatial modulation index for upright and inverted bigrams. Asterisks  
216 represent statistical significance (\* is  $p < 0.05$ ) obtained using a sign-rank test  
217 on the spatial modulation index across the 10 neurons.  
218

## 219 **Experiment S1: Upright and inverted trigrams**

220 Here, we asked whether the above results would extend to trigrams. We tested  
221 two predictions. First, we predicted greater spatial modulation for upright compared to  
222 inverted trigrams, on the premise that better discrimination of trigram transpositions  
223 should be driven by asymmetric spatial summation. Second, if repeated viewing of a  
224 trigram or word led to the formation of specialized trigram detectors, then the letter  
225 model (which is based only on knowledge of single letters) should produce larger  
226 errors compared to other trigrams. We tested this prediction by comparing model fits  
227 for searches involving frequent trigrams and words compared to other searches.  
228

229 *Methods.* A total of 9 subjects (6 females, aged  $24.5 \pm 2.3$  years) participated in the  
230 experiment. Six uppercase letters: A, G, N, R, T and Y were combined in all possible  
231 3-letter combination to form a total of 216 stimuli. These letters were chosen to include  
232 as many three-letter words as possible. In all, 15 three-letter words could be created  
233 using these letters (ANT, ANY, ART, GAG, GAY, NAG, NAY, RAG, RAN, RAT, RAY,  
234 TAG, TAN, TAR, and TRY).

235 Since the total number of possible search pairs is large ( ${}^{216}C_2 = 23,220$  pairs),  
236 we chose 500 search pairs such that the regression matrix of the part-sum model had  
237 full rank i.e. all the model parameters can be estimated reliably using linear regression.  
238 These 500 searches consisted of 368 random search pairs, 105 ( ${}^{15}C_2$ ) word-word  
239 pairs, 15 ( ${}^3C_2$ ) transposed pairs of nonword comprised of letters G,N, and R. Further,  
240 another set of 15 ( ${}^3C_2$ ) transposed pairs were created using the word TAR. The search  
241 pairs formed using the words TAR, ART and RAT were presented only once (although  
242 they were counted as both word-word pairs and transposed pairs in the main analysis).

243 Subjects performed the same searches using upright and inverted trigrams.  
244 Stimuli subtended  $\sim 5^\circ$  along the longer dimension. All subjects completed 2000  
245 correct trials (500 searches  $\times$  2 orientations  $\times$  2 repetitions). All other details were  
246 identical to Experiment 1.  
247

## 248 **Results**

249 An example oddball array in the trigram experiment is shown in Figure S3A.  
250 Note that it is no longer meaningful to compare repeated letter trigrams (AAA-BBB)  
251 with transposed trigrams (ABC-BCA) because the repeated letter pairs contain two  
252 unique letters whereas the transposed trigrams contain three unique letters. Subjects  
253 were highly consistent in both upright and inverted searches (split-half correlation  
254 between even and odd- subjects:  $r = 0.76$  &  $0.80$ ,  $p < 0.00005$ ). Upright and inverted  
255 dissimilarities were highly correlated ( $r = 0.80$ ,  $p < 0.00005$ ; Figure S3B), although  
256 upright searches had higher dissimilarity compared to inverted searches.

257 Next we asked whether the letter model can predict dissimilarities between  
258 upright trigrams. As before, letter model predictions were highly correlated with the  
259 observed data ( $r = 0.79$ ,  $p < 0.00005$ ; Figure S3C) and this model fit approached the  
260 data consistency itself ( $r_{data} = 0.88$ ). Model fits errors were actually lower for  
261 transposed pairs compared to word-word pairs and other pairs (mean  $\pm$  sd error:  $0.1$   
262  $\pm 0.08$  for word pairs;  $0.07 \pm 0.06$  for transposed pairs;  $0.11 \pm 0.08$  for other pairs;  $p =$   
263  $0.02$ , rank-sum test). The letter model was also able to predict dissimilarities between  
264 various trigram transpositions ( $r = 0.69$ ,  $p < 0.00005$ ; Figure S3C). Thus, trigram

265 dissimilarities can be predicted by the letter model regardless of word status or trigram  
 266 frequency.

267 We then compared model fits for upright and inverted trigrams. In both cases,  
 268 the letter model predictions ( $r = 0.78$  &  $0.73$  for upright and inverted) were close to the  
 269 consistency of the data ( $r_{data} = 0.85$  &  $0.78$ ; Figure S3D). To compare these model fits  
 270 for upright vs inverted statistically, we performed a bootstrap analysis as before  
 271 (Experiment 3). This analysis revealed no significant difference in model performance  
 272 between upright and inverted searches (fraction of upright < inverted normalized  
 273 model correlation:  $p = 0.07$ ).

274 Finally we asked whether the spatial summation weights of the letter model  
 275 were systematically different between upright and inverted trigrams. Since there are  
 276 three spatial modulation weights for each neuron, we calculated the spatial modulation  
 277 index for all possible pairs of weights (Figure S3 E,F,G). The spatial modulation ratio  
 278 was larger for upright compared to inverted trigrams in two of the three pairs, and this  
 279 difference attained statistical significance for the first and third letters in the trigram  
 280 (Figure S3F). We conclude that the spatial modulation is stronger for upright compared  
 281 to inverted trigrams.

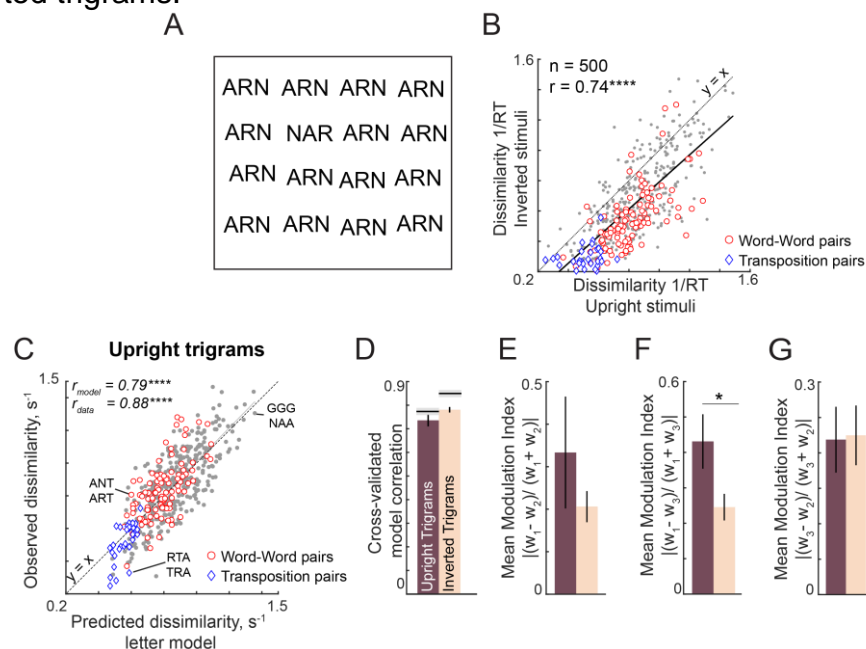

282

283

### Figure S3. Letter model fits for upright and inverted trigrams

284 (A) Example trigram search array containing letter transpositions, with oddball  
 285 target (NAR) among distractors (ARN). It can be seen that this search is  
 286 substantially harder when inverted compared to upright.

287 (B) Dissimilarity for inverted trigram searches (1/RT) plotted against dissimilarity for  
 288 upright trigram searches for word-word pairs (red circles,  $n = 105$ ), transposed  
 289 letter pairs (blue diamonds,  $n = 30$ ), and other pairs (gray circles,  $n = 365$ ).

290 (C) Observed dissimilarity for upright trigrams plotted against the predicted  
 291 dissimilarity from the letter model with symbol conventions as in (B).

292 (D) Cross-validated letter model correlation for upright and inverted trigrams.

293 (E) Average spatial modulation index (across 10 neurons) for the first and second  
 294 letters in the trigram.

295 (F) Same as (E) but for the first and third letters.

296 (G) Same as (E) but for the second and third letters.

297

## SECTION A3: COMPOUND WORDS

298

299

300

301

302

Here we created compound words by combining two valid words such as FORGET from FOR and GET (Figure S5A). This resulted in some valid words (e.g. FORGET, TEAPOT) and many invalid words (e.g. FORPOT and TEAGET). The full stimulus set is shown in Figure S4.

303

304

305

306

307

308

309

310

If valid words are driven by specialized detectors, responses to valid words should be less predictable by the single letter model. We formulated two specific predictions. First, we hypothesize that the dissimilarity between valid words (e.g. FORMAT vs TEAPOT) would yield larger model errors compared to invalid word pairs (e.g. DAYFOR vs ANYMAT). Second, we predicted that the dissimilarity between two invalid compound words (e.g. DAYFOR vs ANYMAT) should be explained better by their constituent trigrams (DAY, FOR, ANY, MAT) rather than by their constituent letters (Figure S5B).

311

312

313

### METHODS

314

315

316

317

318

319

320

321

322

323

324

325

A total of 8 subjects (4 female, aged  $25 \pm 2.5$  years) participated in the experiment. Twelve 3-letter words were chosen: ANY, FOR, TAR, KEY, SUN, TEA, ONE, MAT, GET, PAD, DAY, POT. Each word was scrambled to obtain twelve 3-letter nonwords containing the same letters. The 12 words were combined to form 36 compound words (Figure S4), such that they appeared equally on the left and right half of the compound words. It can be seen that there are seven valid words, whereas the other compound words are pseudowords that carry no meaning. The compound words measured  $6^\circ$  along the longer dimension. Subjects completed 1260 correct trials ( ${}^{36}C_2$  search pairs x 2 repetitions). Additionally, subjects also performed visual search on 3-letter words ( $n = 132$ ,  ${}^{12}C_2$  x 2 repetitions) and their jumbled versions ( $n = 132$ ). Trials timed out after 15 seconds. All other details were identical to Experiment 1.

326

327

328

329

Subjects were highly accurate on this task (mean  $\pm$  std:  $98 \pm 1\%$ ). Outliers in the reaction times were removed using built-in routines in MATLAB (isoutlier function, MATLAB R2018a). This step removed 6.4% of the response time data.

|     | ANY    | FOR    | TAR    | KEY    | SUN    | TEA    |
|-----|--------|--------|--------|--------|--------|--------|
| ONE | ANYONE | ONEFOR | ONETAR | KEYONE | ONESUN | TEAONE |
| MAT | MATANY | FORMAT | MATTAR | MATKEY | SUNMAT | TEAMAT |
| GET | GETANY | FORGET | TARGET | KEYGET | GETSUN | GETTEA |
| PAD | PADANY | FORPAD | TARPAD | KEYPAD | PADSUN | PADTEA |
| DAY | ANYDAY | DAYFOR | TARDAY | DAYKEY | SUNDAY | DAYTEA |
| POT | ANYPOT | POTFOR | POTTAR | POTKEY | SUNPOT | TEAPOT |

330

331

332

333

334

**Figure S4. Stimulus set used for Experiment 4 (Compound Words).** The left and the right 3 letters words were combined to form a 6-letter string. The strings that formed compound words are highlighted in red.

335

### RESULTS

336

337

338

339

We recruited 8 subjects to perform oddball search involving pairs of trigrams as well as 6-letter strings. In all there were 12 three-letter words which resulted in  ${}^{12}C_2 = 66$  searches and 36 compound 6-letter strings which resulted in  ${}^{36}C_2 = 630$  searches. We also included 12 three-letter nonwords created by transposing each three-letter



340 words, resulting in an additional  ${}^{12}C_2 = 66$  searches. As before, subjects were highly  
341 consistent in their responses (split-half correlation between odd and even subjects:  $r$   
342 = 0.54,  $p < 0.00005$  for 3-letter words;  $r = 0.46$ ,  $p < 0.00005$  for 3-letter nonwords;  $r =$   
343 0.65,  $p < 0.00005$  for 6-letter words).

344 We started by using the single letter model as before to predict compound word  
345 responses. We took single neuron responses as before from Experiment 1, and took  
346 the response of each neuron to a compound word to be a weighted sum of its  
347 responses to the individual letters. Using these compound word responses, we  
348 calculated the dissimilarity between pairs of compound words, and used nonlinear  
349 fitting to obtain the best model parameters. The single letter model yielded excellent  
350 fits to the data ( $r = 0.68$ ,  $p < 0.00005$ ; Figure S5C). This performance was comparable  
351 to the data consistency estimated as before ( $r_{data} = 0.72$ ).

352 Next we asked whether discrimination between compound words can be  
353 explained better as a combination of two valid three-letter words, or as a combination  
354 of all the constituent six letters. To address this question we constructed a new  
355 compositional model based on trigrams, and asked if its performance was better than  
356 the single letter model (Figure S5D). The trigram-based letter model used trigram  
357 dissimilarity to construct neurons with trigram tuning, and spatial summation over the  
358 two trigrams to predict the 6-gram responses. To compare the performance of both  
359 models even though they have different numbers of free parameters, we used cross-  
360 validation: we fit both models on half the subjects and tested their performance on the  
361 other half. The letter model outperformed the trigram model (Figure S5D). Because  
362 both models were trained on half the subjects and tested on the other half, the upper  
363 bound on their performance is simply the split-half correlation between the two halves  
364 of the data (denoted by  $r_{sh}$ ). Indeed the letter model performance was close to this  
365 upper bound ( $r_{sh} = 0.56$ ; Figure S5D), suggesting that it explained nearly all the  
366 explainable variance in the data. Finally, the letter model outperformed a widely used  
367 model for orthographic distance – the Orthographic Levenshtein Distance (OLD)  
368 (Figure S5D). Thus, compound word discrimination can be understood from single  
369 letters.

370 Finally, the letter model fits for word-word pairs and nonword-nonword pairs  
371 were not significantly different (Figure S5E). This further validates the absence of local  
372 combination detectors (Dehaene et al., 2005) in perception.

373

### 374 **Three-letter word and nonword dissimilarities**

375 To investigate whether the letter model can predict dissimilarities between  
376 three-letter words and non-words, we fit a separate letter model with 6 neurons as  
377 before to the word and non-word dissimilarities. If frequent viewing of words led to the  
378 formation of specialized word detectors, the letter model would show worse model fits  
379 compared to nonwords. However, we observed no such pattern: the letter model fits  
380 were equivalent for words ( $r = 0.69$ ,  $p < 0.00005$ ; Figure S5F) and nonwords ( $r = 0.57$ ,  
381  $p < 0.00005$ ; Figure S5F) – and these fits approached the respective data  
382 consistencies ( $r_{data} = 0.67$  for words, 0.68 for nonwords). We conclude that three-letter  
383 string dissimilarities can be predicted by the letter model regardless of word status.

384

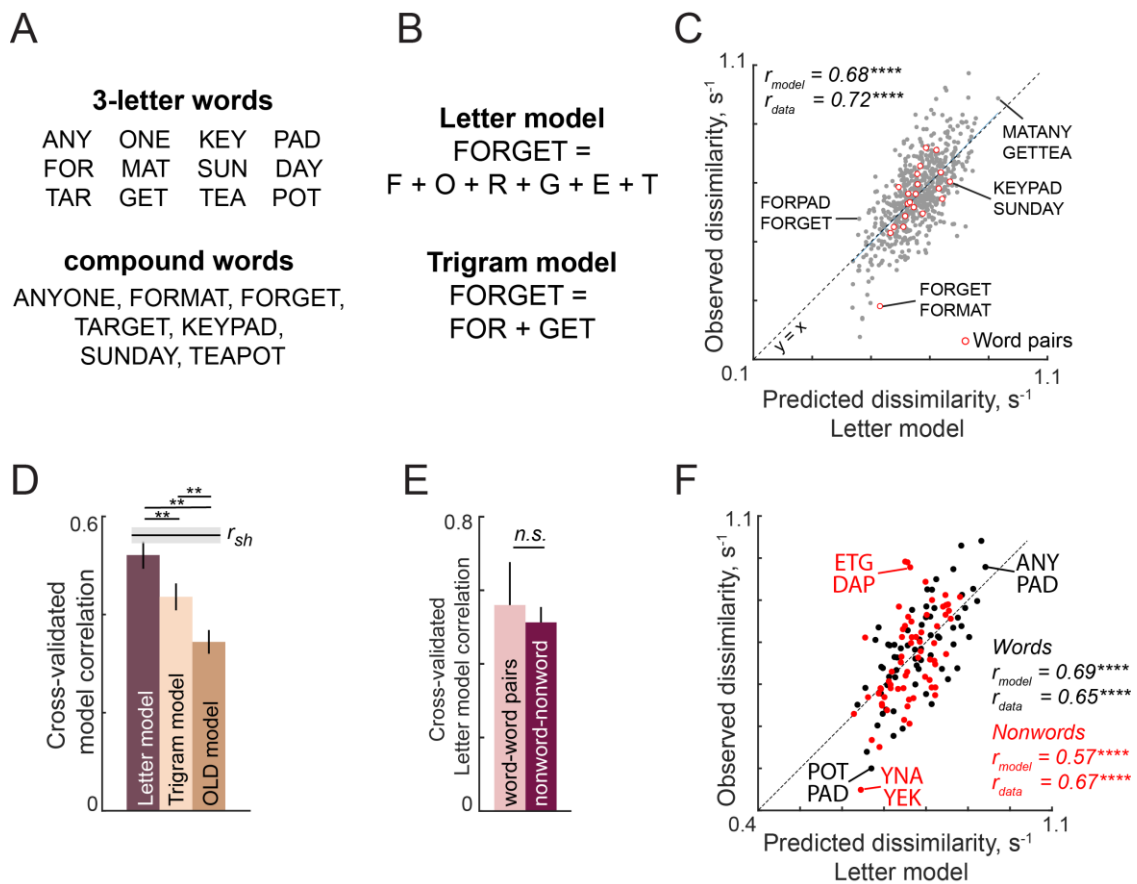

385  
386  
387  
388  
389  
390  
391  
392  
393  
394  
395  
396  
397  
398  
399  
400  
401  
402  
403  
404

**Figure S5. Discrimination of compound words in visual search (Experiment 4).**

- (A) 3-letter words (*top*) used to create compound words (*bottom*).
- (B) Illustration of letter and trigram models. In the letter model, the response to a compound word is a weighted sum of responses to the six single letters. In the trigram model, the response to a compound word is a weighted sum of its two trigrams.
- (C) Observed dissimilarity for compound words plotted against predicted dissimilarity from the letter model for word pairs (*red*) and other pairs (*gray*).
- (D) Cross-validated model correlations for the letter model, trigram model and the Orthographic Levenshtein distance (OLD) model. The upper bound on model fits is the split-half correlation ( $r_{sh}$ ), shown in black with shaded error bars representing standard deviation across 30 random splits. Horizontal lines above shaded error bar depicts significant difference across different models.
- (E) Cross-validated model fits of the letter model for word-words pairs and nonword-nonword pairs.
- (F) Observed dissimilarities for 3-letter words (*black*) and nonwords (*red*) plotted against letter model predictions.

405 **Spatial summation weights**

406 To investigate the spatial summation weights for each neuron, we plotted the  
407 estimated spatial summation weights separately (Figure S6). It can be seen that  
408 spatial summation is heterogeneous across neurons, but the spatial summation of the  
409 first neuron follows the characteristic W-shaped curve for letter position observed in  
410 studies of reading.

411  
412

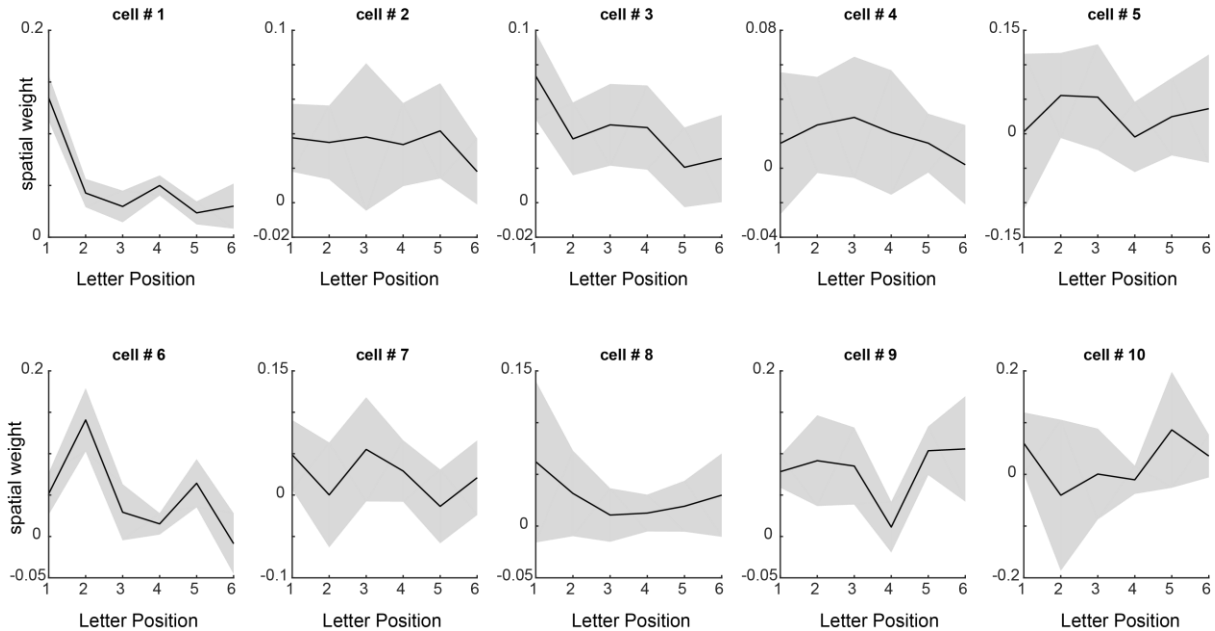

413

414 **Figure S6. Spatial summation weights for each neuron.** Estimated spatial  
415 summation weights (mean  $\pm$  std across many random starting points of the nonlinear  
416 model fit algorithm) for each neuron in the letter model.

417

418

## SECTION A4. EXPERIMENTS WITH LONGER STRINGS

---

419

420

421

422

423

424

In the main text, we showed that bigram dissimilarity in visual search can be explained using a simple letter model with single letter responses that match perception, and a compositional spatial summation rule that predicts responses to bigrams. Here we asked whether this approach would generalize to longer strings of letters.

425

426

427

428

429

430

To this end, we performed four additional experiments on longer strings. In Experiment S2, we created trigrams with a fixed middle letter and all possible combinations of flanking letters, to create multiple three-letter words. In Experiment S3, subjects performed searches involving 3, 4, 5 and 6-letter searches with uppercase, lowercase and mixed case strings. In Experiments S4 & S5, we attempted to optimize the search pairs used to estimate model parameters.

431

432

### METHODS

433

434

435

436

437

438

439

440

*Experiment S2: Trigrams with fixed middle letter.* A total of 8 subjects (5 males, aged  $23.9 \pm 1.8$  years) participated in this experiment. Seven uppercase letters: A, E, I, P, S, T and Y were combined (around the stem R i.e. xRx) in all pairs to form a total of 49 stimuli. These letters were chosen to maximize the occurrence of 3-letter words and pseudowords in the stimulus set. The longer dimension of the stimuli was  $\sim 5^\circ$ . Each subject completed searches corresponding to all possible pairs of stimuli ( ${}^{49}C_2 = 1176$ ) with two trials for each search. All other details were identical to Experiment 2.

441

442

443

444

445

446

447

448

449

450

451

452

453

*Experiment S3: Random string searches.* A total of 12 subjects (9 female, aged  $24.8 \pm 1.64$  years) participated in this experiment. All 26 uppercase and lowercase letters were used to create 1800 stimuli, which were organized into 900 stimulus pairs with varying string length. These 900 pairs comprised 300 6-gram uppercase pairs, 100 6-gram lowercase pairs, 100 6-gram mixed-case pairs, 100 5-gram uppercase pairs, 50 4-gram uppercase pairs, 50 3-gram uppercase pairs and 200 pairs with uppercase strings of differing lengths (50 pairs each of 6- vs 5-grams, 6- vs 4-grams, 5- vs 4-grams, 5- vs 3-grams = 200 pairs total). For each string length, letters were randomly combined to form strings with a constraint that all 26 letters should appear at least once at each location. Each stimulus pair was shown in two searches (with either item as target, and either on the left or right side). The trial timed out at 15 seconds for all searches.

454

455

456

457

458

459

460

461

462

*Experiment S4 – Optimized 4-letter searches.* In all, 8 subjects (5 females, aged  $23.5 \pm 2.3$  years) participated in this experiment. To maximize the importance of each spatial location in a 4-letter uppercase string, stimuli were created such that there were at least 75 search pairs with the same letter at either of the corresponding locations. Further, to reliably estimate the model parameters, the randomly chosen letters were arranged to minimize the condition number of the linear regression matrix X of the ISI model described below. In all there were 300 search pairs. The trial timed out after 15 seconds. All other details were similar to Experiment 2.

463

464

465

466

467

*Experiment S5 – Optimized 6-letter searches.* A total of 9 subjects (5 males, aged  $24.1 \pm 2.2$  years) participated in this experiment. We chose 300 search pairs with 6-letter strings, according to the same criteria as in Experiment S4. All other details were the same as in Experiment S4.

## 468 RESULTS

469 Cross-validated model fits across all experiments are shown in Figure S7. It  
470 can be seen that the letter model fit is close to the split-half consistency of the data.  
471 Thus, visual discrimination of longer strings can be explained using a compositional  
472 neural code. Below we discuss some experiment-specific findings of interest.

473

### 474 *Lowercase and mixed-case strings*

475 Word shape is thought to play a role in reading lowercase letters, because of  
476 the upward deflection (e.g. l, d) and downward deflections (e.g. p, g) of letters which  
477 might confer a specific overall shape to a word. To conclusively establish this would  
478 require factoring out the contribution of individual letters to word discrimination, as with  
479 the letter model. We were therefore particularly interested in whether the letter model  
480 would predict the dissimilarity between lowercase and mixed-case strings where word  
481 shape might potentially play a role. As can be seen in Figure S7, cross-validated model  
482 predictions for lowercase letters were highly correlated with the observed data ( $r =$   
483  $0.59$ ,  $p < 0.00005$ ). This correlation approached the upper bound given by the split-  
484 half reliability itself ( $r_{sh} = 0.64$ ). Likewise, model predictions for mixed-case letters were  
485 also highly correlated with the observed data ( $r = 0.59$ ,  $p < 0.00005$ ; Figure S7).  
486 However in this case model fits were well below the split-half consistency ( $r_{sh} = 0.72$ ),  
487 suggesting that there is still some systematic unexplained variance in mixed-case  
488 strings. This gap in model fit could be simply due to the relatively few mixed-case  
489 searches used in this experiment ( $n = 100$ ), or because of unaccounted factors like  
490 word shape. Nonetheless, the letter model explains a substantial fraction of variation  
491 in both lowercase and mixed case strings, suggesting that it can be used as a powerful  
492 baseline to elucidate the contribution of word shape to reading.

493

### 494 *Unequal length strings*

495 The letter model can be used to calculate responses to any string length,  
496 provided the spatial summation weights are known. Given the relatively few searches  
497 for unequal lengths in our data, we fit the letter model to unequal length strings using  
498 6 neurons. Doing so still raised a fundamental issue: which subset of the 6 spatial  
499 summation weights for each neuron should be used to calculate the response to a 4-  
500 letter string? This requires aligning the 4-letter string to the 6-letter string in some  
501 manner.

502 To address this issue, we evaluated the letter model fit on four possible  
503 alignments between longer and shorter strings, and asked whether model predictions  
504 were better for any one alignment compared to others. We aligned the smaller length  
505 string to either the left, right, centre or edge of the longer string. Model performance  
506 for these different variations is shown in Table S1. It can be seen that the model fits  
507 are comparable across different choices. However, edge alignment is slightly but not  
508 significantly better than other choices. We therefore used edge alignment for all  
509 subsequent model predictions.

510

511

| Alignment                | Letter model correlation |             |             |             |
|--------------------------|--------------------------|-------------|-------------|-------------|
|                          | 6 vs 5                   | 6 vs 4      | 5 vs 3      | 4 vs 3      |
| Left: ABCDEF vs EFGHxx   | 0.54                     | 0.66        | 0.58        | 0.57        |
| Right: ABCDEF vs xxEFGH  | 0.51                     | 0.66        | 0.57        | 0.58        |
| Centre: ABCDEF vs xEFGHx | -                        | <b>0.68</b> | 0.58        | -           |
| Edge: ABCDEF vs EFxxGH   | <b>0.55</b>              | 0.63        | <b>0.60</b> | <b>0.59</b> |

512 **Table S1: Model fits for various choices of string alignment.** In each case we fit  
 513 the letter model with unknown weights corresponding to the longer length. The  
 514 alignment is indicated by the position of “x”s in the string. For instance, “Left” alignment  
 515 means that a 6-letter string ABCDEF is matched to a 4-letter string EFGH by assuming  
 516 that the response to EFGH is created using the first four weights of spatial summation.  
 517 Likewise, right alignment means that EFGH is aligned to the right, and therefore its  
 518 response is created using the last four weights in the 6-letter letter model. The best  
 519 alignment is highlighted for each column in **bold**. None of the correlation coefficient  
 520 differences were statistically significant ( $p > 0.05$ , Fisher’s z-test).

521  
522

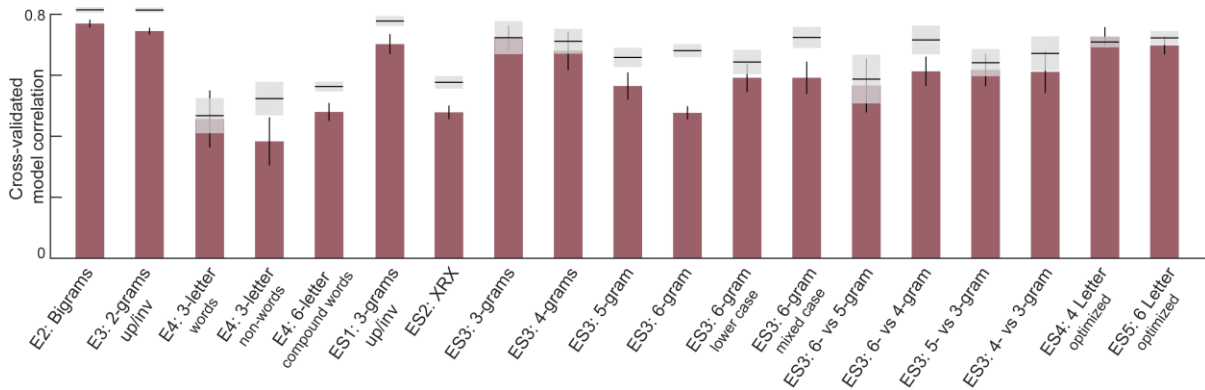

523  
524  
525  
526  
527  
528  
529  
530  
531  
532  
533  
534

**Figure S7. Letter model performance for varying length strings.** For each  
 experiment, we obtained a cross-validated measure of model performance using 6  
 neurons as follows: each time we divided the subjects randomly into two halves, and  
 trained the letter model on one half of the subjects and tested it on the other half. This  
 was repeated for 30 random splits. The correlation between the model predictions and  
 the average dissimilarity from the held-out half of the data was taken to be the model  
 fit. The correlation between the observed dissimilarity between the two random splits  
 of subjects is then the upper bound on model performance (mean  $\pm$  std shown as *gray shaded bars*).



## 535 SECTION A5. ESTIMATING LETTER DISSIMILARITY FROM BIGRAMS

536

### 537 Part-sum model

538 The letter model described in the text has many desirable features but requires  
539 as input the responses to single letters, which were obtained from searches involving  
540 single isolated letters. However, it could be that bigram representations can be  
541 understood in terms of component letter responses that are different from the  
542 responses of letters seen in isolation. It could also be that letter responses are different  
543 at each location.

544 To address these issues, we developed an alternate model in which bigram  
545 dissimilarities can be written in terms of unknown single letter dissimilarities. These  
546 single letter dissimilarities can be estimated in the model. In this model, which we call  
547 the part-sum model, the dissimilarity between two bigrams AB & CD is written as the  
548 sum of all pairs of part dissimilarities in the two bigrams (Figure S8A). Specifically:

549

$$550 d(AB,CD) = CL_{AC} + CR_{BD} + X_{AD} + X_{BC} + W_{AB} + W_{CD} + \text{constant}$$

551

552 where  $CL_{AC}$  is the dissimilarity between letters at Corresponding Left (CL) locations (A  
553 & C),  $CR_{BD}$  is the dissimilarity between letters at the Corresponding Right (CR)  
554 locations (B & D),  $X_{AD}$  &  $X_{BC}$  are the dissimilarities between letters across locations in  
555 the two bigrams (A & D, B & C), and  $W_{AB}$  &  $W_{CD}$  are the dissimilarities of letters within  
556 each bigram.

557 The part-sum model works because a given letter dissimilarity  $CL_{AC}$  will occur  
558 in the dissimilarity of many bigram pairs (e.g. in the pair AB-CD and in AE-CF) thereby  
559 allowing us to estimate its unique contribution. Since there are 7 parts, there are  ${}^7C_2$   
560 = 21 possible part-pairs of each type (i.e. for CL, CR, X and W terms), resulting in 21  
561 x 4 = 84 unknown part dissimilarities. Since a given bigram experiment contains all  
562 possible  ${}^{49}C_2 = 1176$  bigram searches, there are many more observations than  
563 unknowns. The combined set of bigram dissimilarities can be written in the form of a  
564 matrix equation  $\mathbf{y} = \mathbf{X}\mathbf{b}$  where  $\mathbf{y}$  is a 1176x1 vector of observed bigram dissimilarities,  
565  $\mathbf{X}$  is a 1176 x 85 matrix containing the number of times (0, 1 or 2) a given letter-pair of  
566 each type (CL, CR, X & W) contributes to the overall dissimilarity, and  $\mathbf{b}$  is a 85 x 1  
567 vector of unknown letter dissimilarities of each type (21 each of CL, CR, X & W and  
568 one constant term). The unknown letter dissimilarities of each type was estimated  
569 using standard linear regression (*regress* function, MATLAB).

570 The part sum model has several advantages over the letter model: (1) It is linear  
571 which means that its parameters can be uniquely estimated; (2) it is compositional in  
572 that the net dissimilarity between two bigrams is explained using the constituent parts  
573 without invoking more complex interactions; (3) it can account for potentially different  
574 part relations at each location in the two bigrams. We have previously shown that the  
575 part-sum model can explain the dissimilarities between a variety of objects (Prasanna  
576 and Arun, 2016).

577 The part sum model yielded excellent fits to the data ( $r = 0.88$ ,  $p < 0.00005$ ;  
578 Figure S8B) that were close to the reliability of the data ( $r_{data} = 0.90$ ). As before, we  
579 observed no systematic deviations between model fits for frequent bigrams compared  
580 to infrequent bigrams (Figure S8B; average absolute residual error for the top 20  
581 bigram pairs with highest mean bigram frequency:  $0.09 \pm 0.1 s^{-1}$ ; for the bottom-20  
582 bigram pairs:  $0.11 \pm 0.08 s^{-1}$ ;  $p = 0.42$ , rank-sum test). To assess whether the part  
583 dissimilarities of each type (CL, CR, X and W) were related to each other, we plotted  
584 each of CR, X and W terms against the CL terms (Figure S8C). The CR and X terms

585 were highly positively correlated (Figure S8C), whereas the  $W$  terms were negative in  
 586 sign and negatively correlated (Figure S8C). The negative values of the  $W$  terms  
 587 means that bigrams with dissimilar letters become less dissimilar, an effect akin to  
 588 distractor heterogeneity in visual search (Duncan and Humphreys, 1989; Vighneshvel  
 589 and Arun, 2013). We conclude that the CL, CR, X and  $W$  terms in the part-sum model  
 590 are driven by a common part representation.

591 To visualize this underlying letter representation, we performed  
 592 multidimensional scaling on the estimated part dissimilarities of the CL terms. In the  
 593 resulting plot, nearby letters represent similar letters (Figure S8D). It can be seen that  
 594 I & T, M & N are similar as in the single-letter representation (Figure S1A). These  
 595 single letter dissimilarities estimated from bigrams using the part-sum model were  
 596 highly correlated with the single-letter dissimilarities directly observed from visual  
 597 search with isolated letters (Figure S8D).

598 We conclude that bigram dissimilarities can be predicted from a common  
 599 underlying letter representation that is identical to that of single isolated letters.

600

### 601 **Equivalence between part-sum and letter model**

602 Given that the part-sum model and letter model both give equivalent fits to the  
 603 data, we investigated how they are related. Consider a single neuron whose response  
 604 to a bigram AB is given by:  $r_{AB} = \alpha r_A + r_B$ , where  $r_A$  and  $r_B$  are its responses to A & B,  
 605 and  $\alpha$  is the spatial weight of A relative to B. Similarly its response to the bigram CD  
 606 can be written as  $r_{CD} = \alpha r_C + r_D$ . Then the dissimilarity between AB and CD can be  
 607 written as

608

$$\begin{aligned}
 609 \quad & d(AB, CD)^2 \\
 610 \quad & = (r_{AB} - r_{CD})^2 = (\alpha r_A + r_B - \alpha r_C - r_D)^2 \\
 611 \quad & = (\alpha(r_A - r_C) + (r_B - r_D))^2 \\
 612 \quad & = \alpha^2(r_A - r_C)^2 + (r_B - r_D)^2 + 2\alpha(r_A - r_C)(r_B - r_D) \\
 613 \quad & = \alpha^2(r_A - r_C)^2 + (r_B - r_D)^2 + 2\alpha(r_A r_B + r_C r_D - r_A r_D - r_B r_C) \\
 614 \quad & = \alpha^2(r_A - r_C)^2 + (r_B - r_D)^2 + \alpha[(r_A - r_D)^2 + (r_B - r_C)^2 - (r_A - r_B)^2 - (r_C - r_D)^2] \\
 615 \quad & = \alpha^2 d_{AC}^2 + d_{BD}^2 + \alpha(d_{AD}^2 + d_{BC}^2 - d_{AB}^2 - d_{CD}^2) \\
 616 \quad & = \alpha^2 d_{AC}^2 + d_{BD}^2 + \alpha(d_{AD}^2 + d_{BC}^2) - \alpha(d_{AB}^2 + d_{CD}^2)
 \end{aligned}$$

617

618 Thus, the squared dissimilarity between AB & CD can be written as a weighted sum  
 619 of squared dissimilarities between parts at corresponding locations (A-C & B-D), parts  
 620 at opposite locations (A-D & B-C) and between parts within each bigram (A-B & C-D),  
 621 which is essentially the same as the part-sum model. The same argument extends to  
 622 multiple neurons because the total bigram dissimilarity will be the sum of bigram  
 623 dissimilarities across all neurons.

624 There are however two important differences. First, the part sum model is  
 625 written in terms of a weighted sum of part dissimilarities, whereas the above equation  
 626 refers to a weighted sum of squared dissimilarities. However, the squared sum of  
 627 distances and a weighted sum of distances are highly correlated, so the essential  
 628 relation will still hold. Second, the letter model predicts that the across-bigram terms  
 629 ( $X_{AD}$ ,  $X_{BC}$ ) should be similar in magnitude but opposite in sign to the within-bigram  
 630 terms ( $W_{AB}$ ,  $W_{CD}$ ). These weights are similar in magnitude but not exactly equal, as  
 631 can be seen in Fig S8C. The part-sum model thus allows for greater flexibility in part  
 632 interactions compared to the letter model.



### 633 **Reducing part-sum model complexity (ISI model)**

634 The observation that a common set of letter dissimilarities drive the part-sum  
635 model suggests that the part-sum model can be simplified. We therefore devised a  
636 reduced version of the part-sum model – called the Independent Spatial Interaction  
637 (ISI) model – in which the CL, CR, X and W terms are scaled versions of the single  
638 letter dissimilarities (Figure S8E). Specifically, the dissimilarity between bigrams AB &  
639 CD is:

$$640 \quad d(AB, CD) = \alpha_{10}d_{AC} + \alpha_{20}d_{BD} + \alpha_{11}(d_{AD} + d_{BC}) + \beta_{11}(d_{AB} + d_{CD}) + c$$

642 where  $d_{AC}$  is the observed dissimilarity between the left letters A & C from visual  
643 search and  $\alpha_{10}$  is an unknown scaling term,  $d_{BD}$  is the observed dissimilarity between  
644 the right letters B & D, and  $\alpha_{20}$  is an unknown scaling term. Likewise,  $\alpha_{11}$  is an unknown  
645 scaling term for the net dissimilarity ( $d_{AD} + d_{BC}$ ) between letters across locations,  $\beta_{11}$   
646 is the unknown scaling term for the net dissimilarity ( $d_{AB} + d_{CD}$ ) between letters within  
647 the two bigrams and  $c$  is a constant. Thus, the ISI model has only 5 free parameters:  
648  $\alpha_{10}, \alpha_{20}, \alpha_{11}, \beta_{11}$  and  $c$ . These parameters can be estimated by solving the matrix  
649 equation  $\mathbf{y} = \mathbf{X}\mathbf{b}$  where  $\mathbf{y}$  is a 1176x1 vector of observed bigram dissimilarities,  $\mathbf{X}$  is a  
650 1176 x 5 matrix containing the net single dissimilarity of each type (CL, CR, X & W)  
651 that contributes to the total dissimilarity, and  $\mathbf{b}$  is a 5 x 1 vector of unknown weights  
652 corresponding to the contribution of each type of dissimilarity (plus a constant).  
653

654 The performance of the ISI model is summarized in Figure S8F. It can be seen  
655 that, despite having only 5 free parameters compared to 85 parameters of the part-  
656 sum model, the ISI model yields comparable fits to the data (Figure S8F).  
657

658

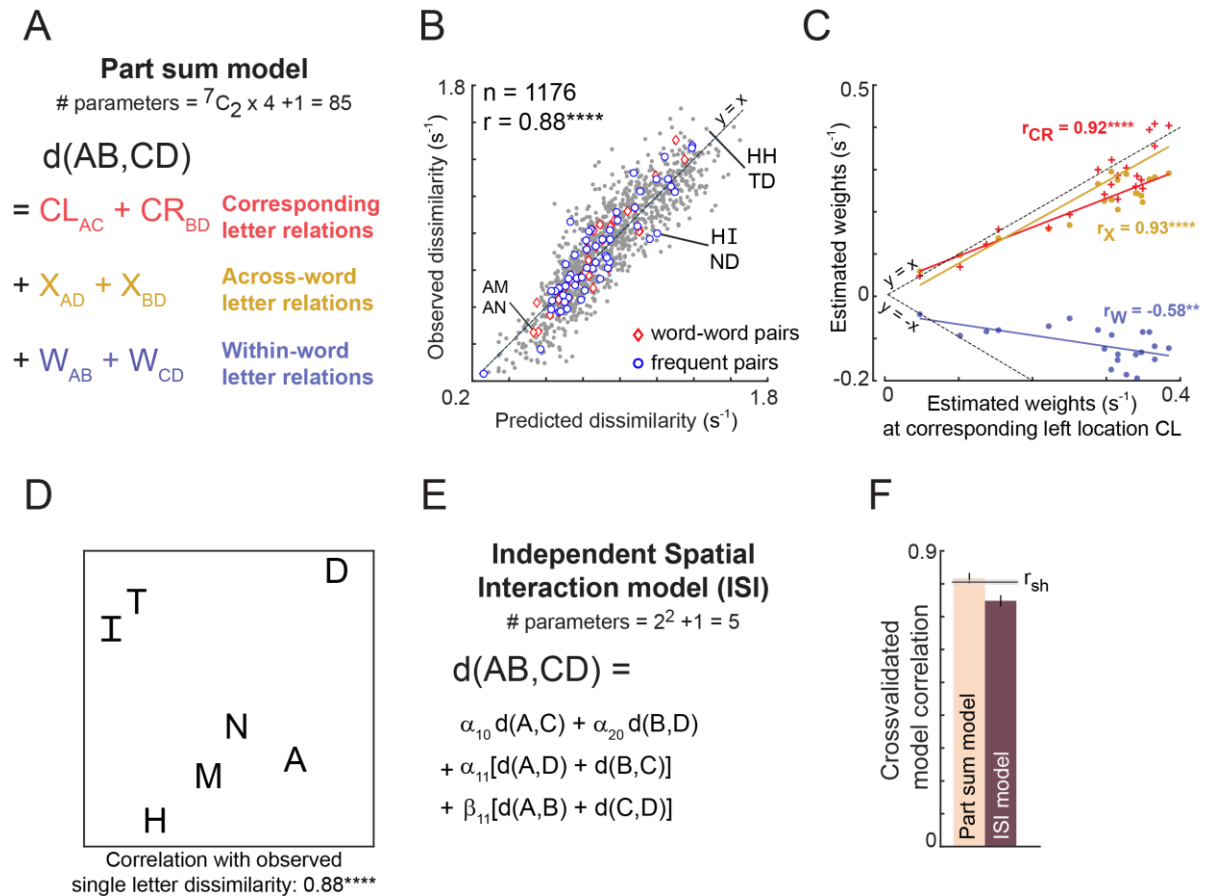

659

660

**Figure S8. Predicting bigram dissimilarity using part-sum model**

661

(A) Schematic of the part sum model. According to this model, the dissimilarity (1/RT) between bigrams ‘AB’ and ‘CD’ is written as a linear sum of dissimilarities of its corresponding part terms (AC and BD, shown in red), across part terms (AD and BC, shown in yellow), and within part terms (AB and CD, shown in blue).

662

(B) Correlation between the observed and predicted dissimilarities (1/seconds). Each point represents one search pair ( $n = {}^49C_2 = 1176$ ). Word-word pairs are highlighted using red diamonds, and frequent bigram pairs are highlighted using blue circles. Dotted lines represent unity slope line.

663

(C) Correlation between the estimated weights at corresponding location left with estimated weights at 1) corresponding location right (red), 2) across location (yellow), and 3) within location (blue). Each point represents one letter pair ( $n = {}^7C_2 = 21$ ). Dotted lines represent positive and negative unity slope line.

664

(D) Perceptual space of the single letter dissimilarities, that are the model coefficients of part terms at left corresponding location

665

(E) Schematic of the Independent Spatial Interaction model. In this model, we use the observed letter-pair dissimilarities and only estimate the weights of these letter-pair dissimilarities across different locations.

666

(F) Comparing part-sum and ISI model fits. Bar plots represents mean correlation coefficient between the observed and predicted dissimilarities. Error bars represent one standard deviation across 30 splits. Black horizontal line represents mean split-half correlation ( $r_{sh}$ ) and the shaded error bar represents one standard deviation around the mean. (\*\*\*\*,  $p < 0.00005$ , \*\*,  $p < 0.005$ ).

667

668

669

670

671

672

673

674

675

676

677

678

679

680

681

682

683

684

## 685 ISI model performance across all experiments

686 Next we asked whether the ISI model can be generalized to explain  
 687 dissimilarities between longer strings. Consider two n-letter strings  $u_1u_2u_3u_4 \dots u_n$  and  
 688  $v_1v_2v_3v_4 \dots v_n$ . The net dissimilarity between the two strings can be written as:  
 689

$$690 \quad d(u_1u_2 \dots u_n, v_1v_2 \dots v_n) = \sum_{i=0}^n \sum_{k=0}^{n-i} \alpha_{ik} (d(u_i, v_{i+k}) + d(v_i, u_{i+k})) - \sum_{i=0}^n \sum_{k=1}^{n-i} \beta_{ik} (d(u_i, u_{i+k}) + d(v_i, v_{i+k})) + c$$

691 where  $\alpha_{ik}$  are the unknown weights corresponding to pairs of letters across the two n-  
 692 grams separated by “k” positions starting from 0, and  $\beta_{ik}$  are the unknown weights  
 693 corresponding to pairs of letters separated by “k” positions within the two n-grams.  
 694 Written in this manner, the total number of unknowns in the n-gram ISI model is  $n^2+1$ ,  
 695 which can be estimated using standard linear regression as before. For instance, for  
 696 the 6-gram ISI model, there are  $6^2+1 = 37$  free parameters.  
 697

698 In this manner, we fit the ISI model to all experiments. The resulting cross-  
 699 validated model fits are shown together with the letter model in Figure S9. It can be  
 700 seen that the ISI model performance is comparable to that of the letter model across  
 701 all experiments.  
 702

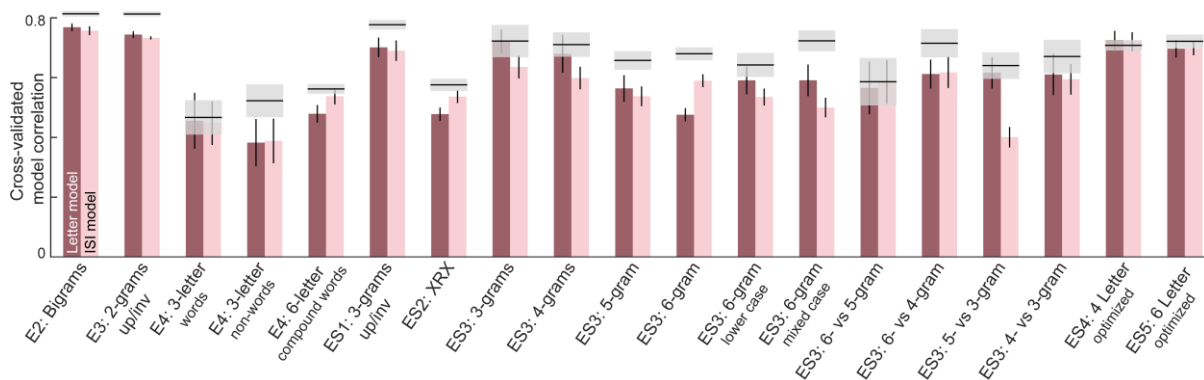

703 **Figure S9. ISI & letter model performance across all experiments**

704 For each experiment, we obtained a cross-validated measure of both neural and ISI  
 705 model performance as follows: each time we divided the subjects randomly into two  
 706 halves, and trained the letter model on one half of the subjects and tested it on the  
 707 other half. This was repeated for 30 random splits. The correlation between the model  
 708 predictions and the average dissimilarity from the held-out half of the data was taken  
 709 to be the model fit. The correlation between the observed dissimilarity between the  
 710 two random splits of subjects is then the upper bound on model performance (mean ±  
 711 std shown as *gray shaded bars*).  
 712  
 713

## 714 **Reducing the complexity of the ISI model**

715 According to the ISI model, the net dissimilarity between two n-grams can be  
716 written as a weighted sum of dissimilarities between letter pairs that are varying  
717 distances apart. We wondered if the ISI model can be simplified further if there is a  
718 systematic pattern whereby these weight corresponding to a given letter pair varies  
719 systematically with letter position and distance between the letters.

720 To assess this possibility, we plotted model coefficients of the ISI model  
721 estimated from Experiment S3 along two dimensions. First, we asked if the  
722 contribution of letter pairs at corresponding locations in the two n-grams varies with  
723 letter position. For varying string lengths (3-, 4-, 5- and 6-letter strings) we observed a  
724 characteristic U-shaped function whereby the edge letters contribute more to the net  
725 dissimilarity compared to the middle letters (Figure S10A). Second, we asked if model  
726 weights decrease systematically with inter-letter distance. This was indeed the case  
727 regardless of the starting letter in the pair (Figure S10B). Finally, we note that across  
728 and within part terms are roughly equal in magnitude but opposite in sign (Figure S8C).

729 The above pattern of weights in the ISI model suggest that we can make two  
730 simplifying assumptions. First, the weight of the starting letter is a U-shaped function  
731 when the inter-letter distance is zero ( $\alpha_{i0}$ ). Second, weights decrease exponentially  
732 thereafter with increasing inter-letter distance. Specifically:

$$\begin{aligned} 733 \quad \alpha_{i0} &= ai^2 + bi + c \text{ for } i = 1, 2, \dots, n \\ 734 \quad \alpha_{ik} &= \alpha_{i0} e^{-k/\tau} \text{ for } k \geq 1 \\ 735 \quad \beta_{ik} &= -\alpha_{ik} \text{ for } k \geq 1 \end{aligned}$$

736 where  $a, b, c$  and  $\tau$  are the free parameters in this model. This simplified model,  
737 which we call the Spatial Interaction Decay (SID) model has only 5 parameters and  
738 can be used to predict the dissimilarities between strings of arbitrary length. The model  
739 parameters are obtained using nonlinear gradient descent methods (*nlinfit* function,  
740 MATLAB).

741 To illustrate the performance of the SID model in comparison to the ISI model,  
742 we fit the model to 6-letter compound words (Experiment 4). To compare the two  
743 models, we plotted the ISI model terms directly estimated from the search data against  
744 the ISI model terms predicted from the SID model. This yielded a strong positive  
745 correlation (Figure S10C). The SID model also yielded excellent fits to the data (Figure  
746 S10D), and both models yielded comparable fits (Figure S10E).

747 To evaluate this pattern across all experiments, we fit both SID and ISI models  
748 to all experiments. Here too we obtained qualitatively similar fits for the two models  
749 (Figure S11). To confirm whether the SID model trained on one experiment can  
750 capture the variations in another, we trained the SID model on data from Experiment  
751 S5 and evaluated it on all other experiments. This too yielded largely similar but  
752 smaller predictions (Figure S11). This decrease in model fit suggests that model  
753 parameters are somewhat dependent on the search pairs chosen.

754 We conclude that dissimilarities between arbitrary letter strings can be  
755 predicted using highly simplified models that operate on single letter dissimilarities and  
756 simple compositional rules.  
757

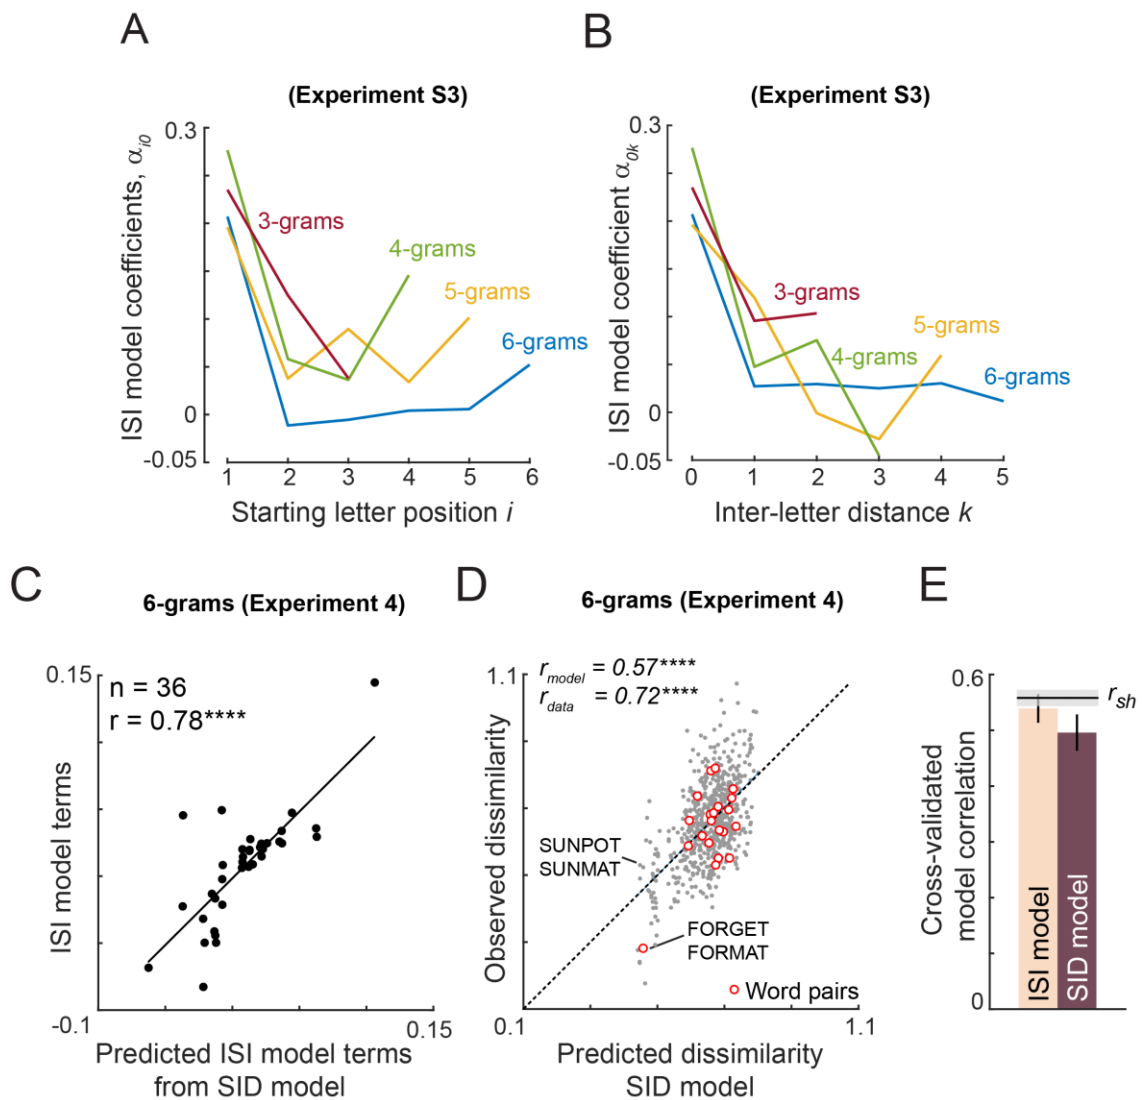

758  
759  
760  
761  
762  
763  
764  
765  
766  
767  
768  
769  
770

**Figure S10. Reducing the ISI model**

- (A) ISI model coefficients  $\alpha_{i0}$  as a function of starting letter position  $i$ , for Experiment S3, for varying string lengths.
- (B) ISI model coefficients  $\alpha_{1k}$  as a function of inter-letter distance  $k$  for Experiment S3, for varying string lengths.
- (C) ISI model coefficients (both  $\alpha_{ik}$  and  $\beta_{ik}$ ) plotted against the predicted ISI model coefficients from the SID model. Both models are fitted to data from Experiment 4 (compound words).
- (D) Observed dissimilarity in Experiment 4 plotted against predicted dissimilarity from the SID model.
- (E) Cross-validated model correlation for ISI & SID models.

771

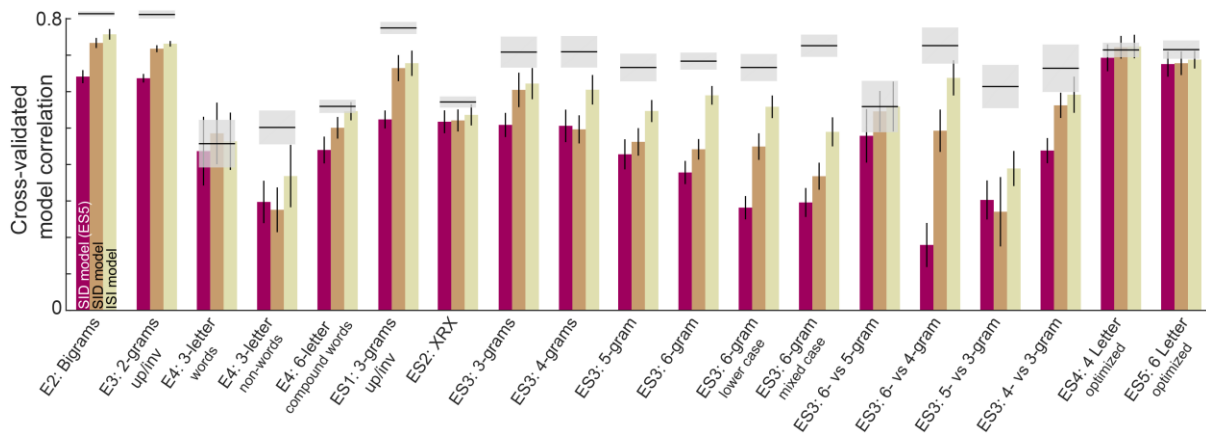

772

773

774

775

776

777

778

**Figure S11. ISI and SID model fits across all experiments.** Cross-validated model fits for the ISI and SID models across all experiments. In each case the SID and ISI models were fit on a randomly chosen half of the subjects and tested on the other half. The SID (ES5) bars refer to the SID model trained on Experiment S5 and tested on data from a randomly chosen half of subjects in each experiment.



779 **Comparing upright and inverted bigrams using part-sum model**

780 The results in Section A2 were based on fitting the letter model to upright and  
 781 inverted bigrams but assuming a fixed set of single letter responses derived from  
 782 uppercase letters. The fact that the letter model yielded excellent fits to both upright  
 783 and inverted bigrams validates this assumption. Nonetheless, we wondered whether  
 784 differences between upright and inverted bigram searches can be explained solely by  
 785 different letter representations or by differences in letter interactions.

786 To investigate this possibility, we fit the part-sum model to upright and inverted  
 787 bigram searches (Figure S12A). The part-sum model also yielded equivalent fits to  
 788 both upright and inverted searches (Figure S12B). If model predictions were similar,  
 789 we reasoned that the difference between upright and inverted searches must be  
 790 explained by differences in model parameters. To this end, we compared the  
 791 estimated letter dissimilarities of each type (CL, CR, X and W) in the upright and  
 792 inverted searches (Figure S12C). Model terms were comparable in magnitude for the  
 793 CL terms, but were systematically weaker for both CR, X and W terms for inverted  
 794 compared to upright searches (Figure S12C). However in all cases, the recovered  
 795 letter dissimilarities were correlated between upright and inverted conditions  
 796 (correlation between upright and inverted model terms:  $r = 0.93, 0.91, 0.97$  &  $0.87$  for  
 797 CL, CR, X & W terms; all correlations  $p < 0.00005$ ).

798  
 799

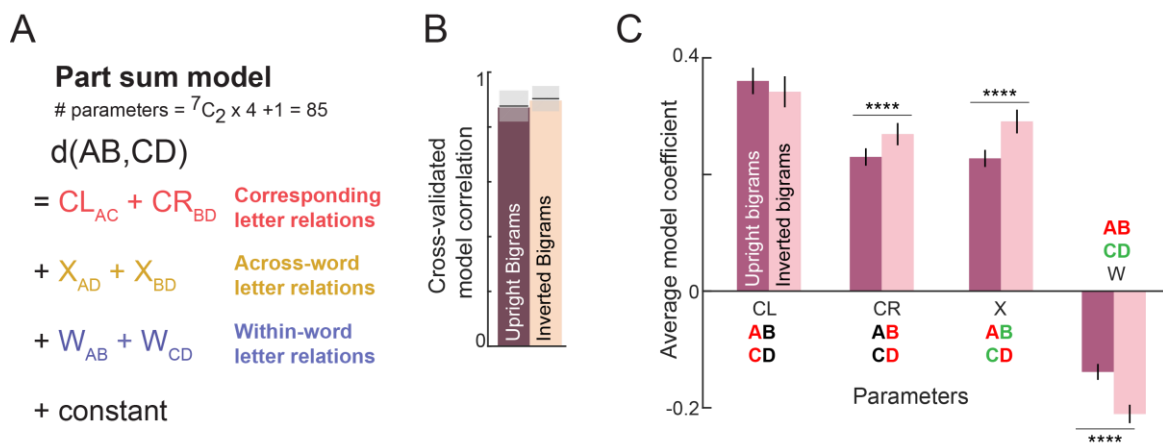

800  
 801  
 802  
 803  
 804  
 805  
 806  
 807  
 808  
 809  
 810  
 811  
 812

**Figure S12. Part-sum model fits for upright and inverted bigrams**

- (A) Schematic of the part-sum model, in which the net dissimilarity between two bigrams is given as a linear sum of letter dissimilarities at corresponding locations (CL & CR), across-bigrams (X) and within-bigrams (W).
- (B) Cross-validated model correlation of the part sum model for upright and inverted bigrams.
- (C) Average model coefficients (mean  $\pm$  sem) of each type for upright and inverted bigrams. Asterisks denote statistical significance (\*\*\*\* is  $p < 0.00005$ ) obtained on a sign-rank test comparing 15 letter dissimilarities between upright and inverted conditions).

### 813 Comparing upright and inverted trigrams using part-sum model

814 The part sum model applied to trigrams is depicted in Figure S13A. In this  
 815 model, the net dissimilarity between two trigrams can be written as a sum of single  
 816 letter dissimilarities at every possible pair of locations. These locations are grouped as  
 817 corresponding letters at left (C1), middle (C2) and right (C3) locations, letters across  
 818 trigrams that are one letter apart starting from the left letter (XN1) or the middle letter  
 819 (XN2), letters across trigrams that are two letters apart (XF), letters within each trigram  
 820 that are one letter apart starting from the left letter (WN1) or middle letter (WN2), and  
 821 letters within each trigram that are two letters apart (WF). Thus the full part-sum model  
 822 has 9 groups of letter dissimilarities (C1, C2, C3, XN1, XN2, XF, WN1, WN2, WF) each  
 823 having  ${}^6C_2 = 15$  unknown single letter dissimilarities. Together with a constant term,  
 824 this part-sum model has  $9 \times 15 + 1 = 136$  free parameters. Since we have 500  
 825 searches each for upright and inverted trigrams, the part-sum model can be fit to this  
 826 data to estimate these free parameters using standard linear regression.

827 Cross-validated model fits for the part-sum model are shown in Figure S13B. It  
 828 can be seen that the part-sum model explains nearly all the explainable variance in  
 829 the data for both upright and inverted trigrams (Figure S13B). This in turn means that  
 830 differences between upright and inverted trigrams can be explained using differences  
 831 in model parameters. This was indeed the case: on plotting the strength of model terms  
 832 of each type it was clear that 7 of the 9 types of model terms (C1, C2, C3, XN2, XF,  
 833 WN2, WF) were systematically larger for upright trigrams compared to inverted  
 834 trigrams (Figure S13C). Finally we confirmed that model terms for upright and inverted  
 835 trigrams were highly correlated (correlation between upright and inverted model terms,  
 836 averaged across 9 model term types:  $r = 0.65 \pm 0.1$ ,  $p < 0.05$  in all cases).

837 We conclude that upright and inverted trigram searches can be explained using  
 838 the part-sum model driven by a common single letter representation.

839

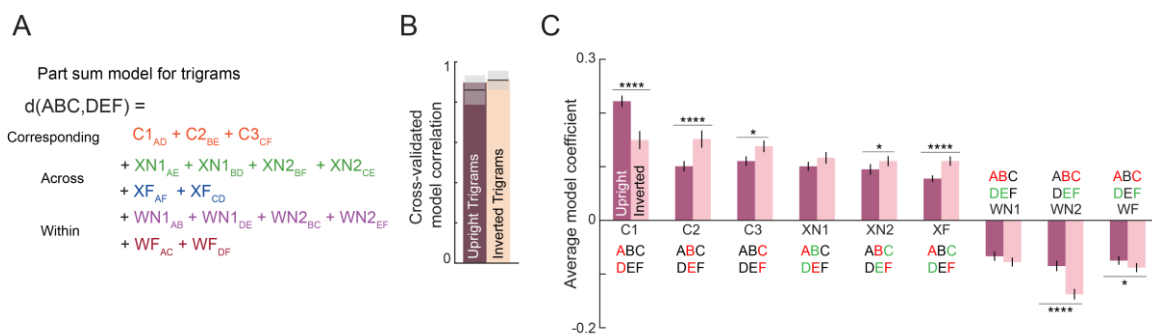

840

### 841 Figure S13. Part-sum model fits for upright and inverted trigrams

842 (A) Schematic of part-sum model for trigrams.

843 (B) Cross-validated model correlation of part-sum model for upright and inverted  
 844 trigrams.

845 (C) Average model coefficient (averaged across  ${}^6C_2 = 15$  terms) of each type for  
 846 upright and inverted trigrams. Asterisks indicate statistical significance (\* is  $p <$   
 847  $0.05$ , \*\* is  $p < 0.005$ , etc) calculated using a sign-rank test comparing the upright  
 848 and inverted model terms.

849



850

## SECTION A6. JUMBLED WORD READING (EXPT S6)

---

851

852 Here, in Experiment S6, we tested subjects on a jumbled word reading task,  
853 where they had to view a jumbled word and recognize the original word.

854

### 855 METHODS

856 *Procedure.* A total of 16 subjects (9 male, aged  $24.8 \pm 2.1$  years) participated in the  
857 task. Other details were similar to Experiment 5.

858 *Stimuli.* We chose 300 words such that no two words were anagrams of each other.  
859 These comprised 75 four-letter words, 150 five-letter words and 75 six-letter words.  
860 Jumbled words were created by shuffling 2, 3, or 4 letters of each word. There were  
861 an equal proportion of 2, 3, and 4 letter transpositions. All stimuli were presented in  
862 uppercase against a black background.

863 *Task.* Each trial began with a fixation cross shown for 0.5 s followed by a jumbled word  
864 that appeared for 5 seconds (for the first 6 subjects) and 7 seconds (for the rest), or  
865 until the subject made a response by pressing the space bar on the keyboard. Subjects  
866 were asked to press a key as soon as they could recognize the unjumbled word. To  
867 ensure that subjects correctly recognized the unjumbled word, they were asked to type  
868 the unjumbled word within 10 seconds of pressing the space bar. The response time  
869 was taken as the time at which the subject pressed the space bar. To avoid any  
870 memory effects, the same set of jumbled words were shown to all subjects exactly  
871 once. We analysed response times only on trials in which the subject subsequently  
872 entered the correct word.

873 *Data Analysis.* Subjects were reasonably accurate on this task (average accuracy:  
874  $59.5 \pm 8\%$  across 300 words). Response times for wrongly typed words were  
875 discarded. Words correctly solved by more than 6 subjects ( $n = 238$ ) were included for  
876 further analysis. Since trials were self-paced, we did not remove any outliers in the  
877 reaction times. Lexical properties were obtained from the English Lexicon Project  
878 (Balota et al., 2007).

879

### 880 RESULTS

881 Of a total of 300 jumbled words tested, we selected for further analysis 238  
882 words that were correctly unjumbled by more than two-thirds of the subjects. Subjects  
883 responded quickly and accurately to these words (mean  $\pm$  std of accuracy:  $71 \pm 9\%$ ;  
884 response time:  $2.13 \pm 0.33$  s across 238 words). Subjects took longer to respond to  
885 some jumbled words (e.g. REHID) compared to others (e.g. DBTOU), as seen in the  
886 sorted response times (Figure S14A). These patterns were consistent across subjects,  
887 as evidenced by a significant split-half correlation ( $r = 0.55$ ,  $p < 0.00005$  between odd-  
888 and even-numbered subjects).

889 Can these patterns in unscrambling time be explained using the letter model?  
890 To do so, we reasoned that jumbled words with large dissimilarity to the original word  
891 will take longer to elicit a response (Figure S14B). Accordingly, we took the average  
892 response times to each jumbled word and asked whether it can be predicted using the  
893 single letter model described previously. For each word length, we optimized the

894 weights of the single letter model to find the best fit to this data, and then combined  
895 the predictions across all word lengths to obtain a composite measure of performance.  
896 The single letter model yielded excellent fits to the data ( $r = 0.76$ ,  $p < 0.00005$ ; Figure  
897 S14C). This model fit was comparable to the data consistency ( $r_{data} = 0.70$ ). An  
898 alternate distance model - Orthographic Levenshtein (OL) distance (Levenshtein,  
899 1966) – calculates the number of edits required to transform one string to other. This  
900 model neither accounts for letter similarity nor the position of edit. Hence, it fails to  
901 account for all the variance in the data ( $r = 0.44$ ,  $p < 0.00005$ ; Figure S14D).

902 The above finding shows that human performance on unscrambling words is  
903 driven primarily by the visual dissimilarity between the jumbled and original word.  
904 However, it does not rule out the presence of lexical factors. To assess this possibility  
905 we formulated a model to predict the unscrambling time as a linear sum of many lexical  
906 factors. We used five lexical properties: log word frequency, log mean letter frequency,  
907 log mean bigram frequency of the jumbled word, log mean bigram frequency of the  
908 unjumbled i.e. original word, and the number of orthographic neighbours (see  
909 Methods). To avoid overfitting by either model, we trained both models on one-half of  
910 the subjects and tested it on the other half. This lexical model yielded relatively poor  
911 fits ( $r = 0.30$ ,  $p < 0.00005$ , Figure S14E) compared to visual dissimilarity from both  
912 single letter model and OL distance model. The difference in model fits was statistically  
913 significant ( $p < 0.05$ , Fisher's z-test). Among the lexical factors, word frequency and  
914 letter frequency contributed the most compared to the others (partial correlation of  
915 each lexical factor after accounting for all others:  $r = -0.23$ ,  $p < 0.0005$  for log word  
916 frequency,  $r = 0.18$ ,  $p < 0.05$  for log mean letter frequency;  $r = .05$ ,  $p = 0.49$  for log  
917 mean bigram frequency of jumbled word;  $r = -0.02$ ,  $p = 0.77$  for log mean bigram  
918 frequency in original word;  $r = 0.04$ ,  $p = 0.58$  for number of orthographic neighbours).

919 To assess the extent of shared variance in the two models, we calculated the  
920 partial correlation between the observed data and the lexical model predictions after  
921 factoring out the contribution from visual dissimilarity. This revealed a small partial  
922 correlation ( $r = 0.31$ ,  $p < 0.00005$ ). Conversely, the partial correlation for the single  
923 letter model after factoring out the lexical model was much higher ( $r = 0.75$ ,  $p <$   
924  $0.00005$ ). Thus, visual dissimilarity from the single letter model dominates jumbled  
925 word reading.

926 Finally we asked whether both visual dissimilarity and lexical factors contribute  
927 to the jumbled word task. We created a combined model in which the jumbled word  
928 response times were a linear combination of the predictions of both models. This  
929 combined model yielded better predictions than either model by itself ( $r = 0.78$ ,  $p <$   
930  $0.00005$ , Figure S14E). To assess the statistical significance of these results, we  
931 performed a bootstrap analysis. On each trial, we trained three models on the  
932 dissimilarity obtained from considering only one randomly chosen half of subjects: the  
933 visual dissimilarity model, the lexical model and the combined model. We calculated  
934 the correlation between all three model predictions on the other half of the data, and  
935 repeated this procedure 1000 times. The OL distance model does not have any free  
936 parameters, hence the distances were directly correlated with the other half of the  
937 data. Across these samples, the lexical model fits never exceeded the visual

938 dissimilarity model, suggesting that the visual dissimilarity model was significantly  
939 better ( $p < 0.05$ ). Likewise, the combined model was only marginally better than the  
940 visual letter model (fraction of combined < visual:  $p = 0.07$ ) but was significantly better  
941 than the lexical model (fraction of combined < lexical:  $p = 0$ ).

942 We conclude that performance on the jumbled word task relies primarily on  
943 visual dissimilarity. We propose that this initial visual representation of a word allows  
944 the subject to make a quick guess at the correct word without explicit symbolic  
945 manipulation.

946

947

## Scrambled word task

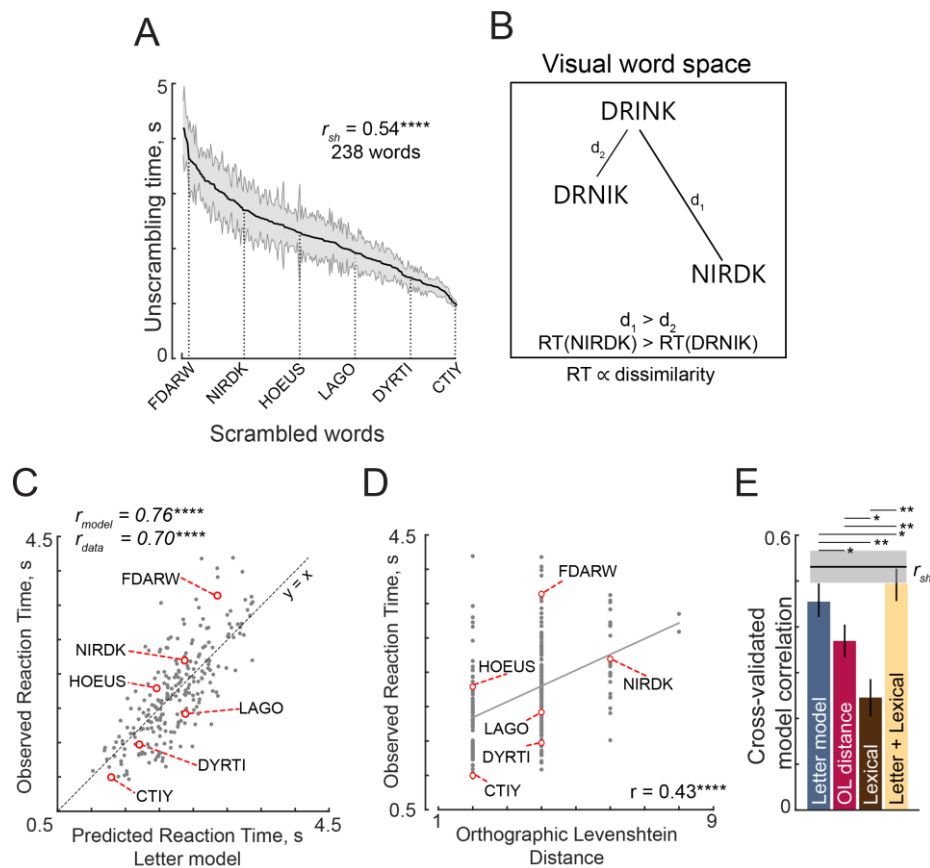

948  
949

### Figure S14. Jumbled word task (Experiment S7).

950 (A) Response times in the jumbled word task sorted in descending order. Shaded error  
951 bars represent s.e.m. Some example words are indicated using dotted lines. The  
952 split-half correlation between subjects ( $r_{sh}$ ) is indicated on the top left.

953 (B) Schematic of visual word space, with one stored word (DRINK) and two jumbled  
954 versions (DRNIK & NIRDK). We predicted that the time taken by subjects to  
955 unscramble a jumbled word would be proportional to its dissimilarity to the stored  
956 word. Thus, subjects would take longer to unscramble NIRDK compared to DRINK.

957 (C) Observed response times in the jumbled word task plotted against predictions from  
958 the letter model based on single letters with spatial summation. Each point  
959 represents one word. Asterisks indicate statistical significance (\*\*\*\* is  $p < 0.00005$ ).

960 (D) Observed response times in the jumbled word task plotted against Orthographic  
961 Levenshtein (OL) distance. Each point represents one word. Asterisks indicate  
962 statistical significance (\*\*\*\* is  $p < 0.00005$ ).

963 (E) Cross-validated model correlations for the letter model, OLD model, lexical model  
964 and the neural+lexical model. Model correlations were obtained by training each  
965 model on one half of subjects, and evaluating the correlation on the other half (error  
966 bars represent standard deviation across 1000 random splits). The upper bound  
967 on model fits is the split-half correlation ( $r_{sh}$ ), shown in black with shaded error bars  
968 representing standard deviation across the same random splits. All correlations  
969 were individually statistically significant ( $p < 0.00005$ ). Horizontal lines above  
970 shaded error bar depicts significant difference across different models i.e. the  
971 fraction of splits in which the observed difference was violated. All significant  
972 comparisons are indicated.

973

974

## SECTION A7. ADDITIONAL ANALYSES FOR EXPERIMENTS 6 & 7

### 975 **Stimulus set**

976 32 words were chosen of varying frequency of occurrence and the nonwords were  
 977 created by either transposition or substitution of middle or edge letters. 10 single  
 978 letters: E, S, A, R, O, L, I, T, N, and D were used to form words. The full set of strings  
 979 used experiments 6 and 7 is shown below.  
 980

| Middle Letter Transposition |              | Edge Letter Transposition |              | Middle Letter Substitution |              | Edge Letter Substitution |              |
|-----------------------------|--------------|---------------------------|--------------|----------------------------|--------------|--------------------------|--------------|
| Words                       | Nonwords     | Words                     | Nonwords     | Words                      | Nonwords     | Words                    | Nonwords     |
| <i>AORTA</i>                | <i>AROTA</i> | <i>STOLE</i>              | <i>TSOLE</i> | <i>NOISE</i>               | <i>NANSE</i> | <i>ONION</i>             | <i>ESION</i> |
| <i>DRAIN</i>                | <i>DARIN</i> | <i>OASIS</i>              | <i>AOSIS</i> | <i>ERROR</i>               | <i>EDLOR</i> | <i>RADIO</i>             | <i>EEDIO</i> |
| <i>TREND</i>                | <i>TERND</i> | <i>SOLID</i>              | <i>OSLID</i> | <i>DRILL</i>               | <i>DTELL</i> | <i>ASSET</i>             | <i>EESET</i> |
| <i>ATLAS</i>                | <i>ALTAS</i> | <i>TRAIN</i>              | <i>RTAIN</i> | <i>ARISE</i>               | <i>AOESE</i> | <i>TEASE</i>             | <i>RDASE</i> |
| <i>DRONE</i>                | <i>DRNOE</i> | <i>ORDER</i>              | <i>ORDRE</i> | <i>LITRE</i>               | <i>LINOE</i> | <i>ENTER</i>             | <i>ENTRO</i> |
| <i>LEARN</i>                | <i>LERAN</i> | <i>INDIA</i>              | <i>INDAI</i> | <i>SLIDE</i>               | <i>SLONE</i> | <i>IDEAL</i>             | <i>IDEDI</i> |
| <i>SANTA</i>                | <i>SATNA</i> | <i>RINSE</i>              | <i>RINES</i> | <i>NASAL</i>               | <i>NATDL</i> | <i>ADORE</i>             | <i>ADODI</i> |
| <i>INSET</i>                | <i>INEST</i> | <i>SNAIL</i>              | <i>SNALI</i> | <i>ALIEN</i>               | <i>ALOTN</i> | <i>LASER</i>             | <i>LASRO</i> |

981 **Table S3: List of 32 words and 32 nonwords used in Experiment 6 & 7.** All words  
 982 and nonwords were created from 10 single letters whose activations were also  
 983 measured in the experiment.  
 984

### 985 **ROI definitions**

| ROI   | Definition                                                                         | #voxels (mean ± sd) | ROI peak location                        |
|-------|------------------------------------------------------------------------------------|---------------------|------------------------------------------|
| V1-V3 | Voxels activated for scrambled > fixation overlaid with anatomical mask of V1-V3   | 398 ± 131           | X: 8 ± 17<br>Y: -96 ± 5<br>Z: 6 ± 9      |
| V4    | Voxels activated for scrambled > fixation overlaid with anatomical mask of V4      | 185 ± 63            | X: 5 ± 26<br>Y: -88 ± 3<br>Z: 27 ± 11    |
| LO    | Voxels activated for object > scrambled and not in other ROIs                      | 371 ± 115           | X: -17 ± 43<br>Y: -66 ± 15<br>Z: -19 ± 5 |
| VWFA  | Voxels with known words > scrambled word in a contiguous region in fusiform gyrus  | 52 ± 15             | X: -44 ± 4<br>Y: -50 ± 5<br>Z: -17 ± 5   |
| TG    | Voxels with native words > scrambled word in a contiguous region in temporal gyrus | 289 ± 182           | X: -44 ± 39<br>Y: -43 ± 18<br>Z: 3 ± 9   |

987 **Table S4. Variability in ROI definitions across subjects.** For each ROI we report  
 988 the mean and standard deviation across subjects of the number of voxels, and the  
 989 XYZ location of the voxel with peak T-value in the normalized brain.  
 990

991  
 992  
 993

994 **Visualization of perceptual and semantic space**

995 To visualize words and nonwords in perceptual space, we performed a  
 996 multidimensional scaling (MDS) analysis of the visual search data (Experiment 7).  
 997 Briefly, MDS finds the best-fitting 2D coordinates that best match with the observed  
 998 distances. In the resulting plot, nearby stimuli correspond to hard searches. The  
 999 perceptual space for words and nonwords is shown in Figure S15 A-B. It can be seen  
 1000 that stimuli with common first letters are grouped together. MDS coordinates for  
 1001 nonwords was rotated without altering their overall configuration so as to best match  
 1002 the MDS coordinates for words.

1003 The semantic dissimilarities were estimated using the GloVe features  
 1004 (Pennington et al., 2014), and visualized using MDS analysis (Figure S15C). In the  
 1005 resulting plot, semantically related words/ frequently cooccurring words are closer to  
 1006 each other.

1007

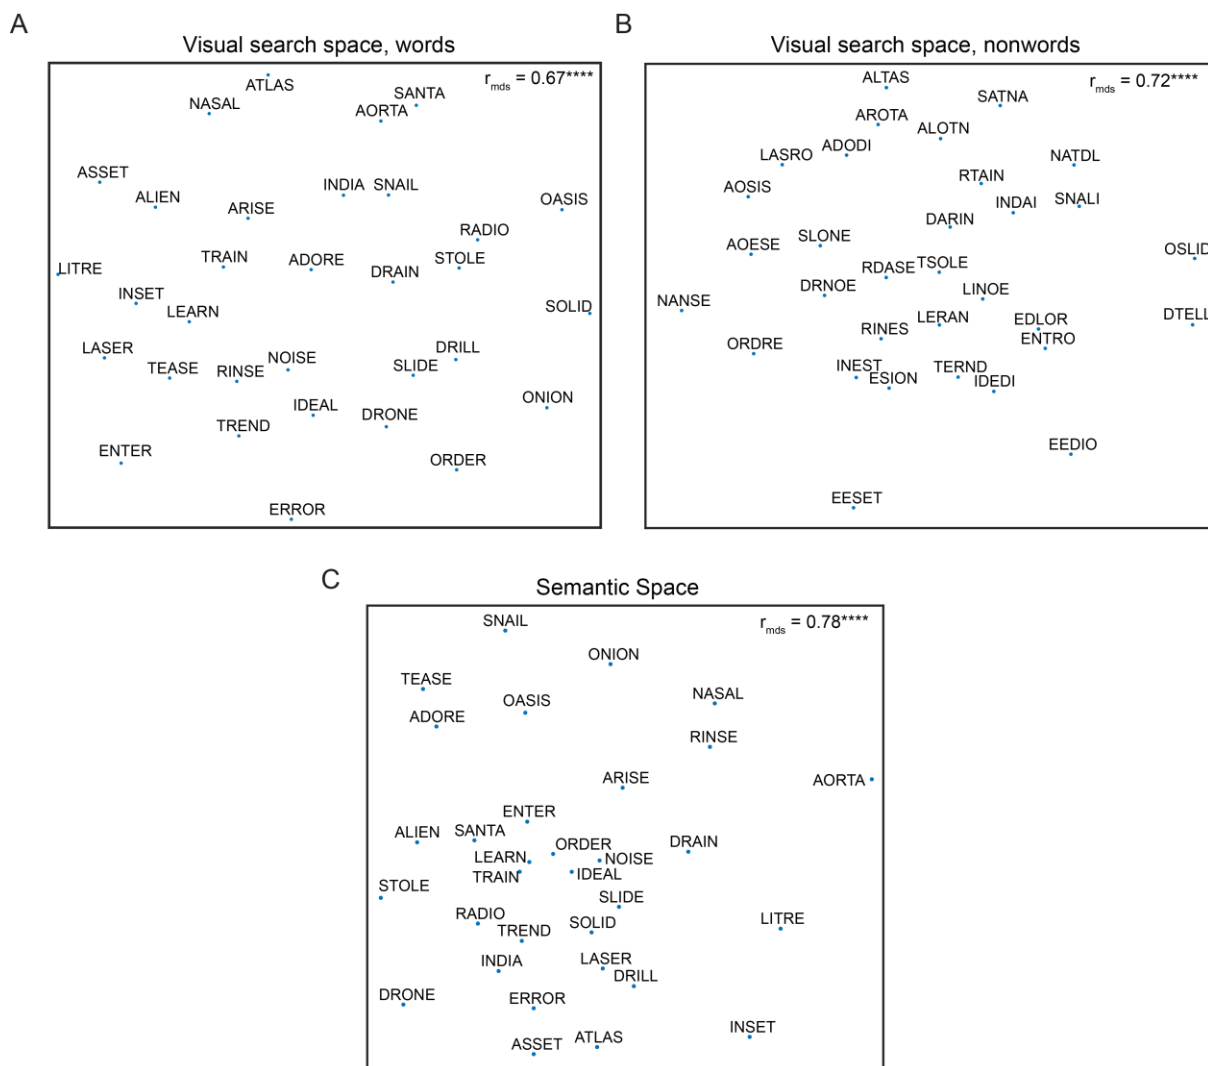

1008

1009

**Figure S15: Multi-dimensional representation of words and nonwords.**

1010

1011

1012

1013

1014

1015

A. Perceptual space for words. we used multidimensional scaling to find the 2D coordinates of all words that best match the observed distances. In the resulting plot, nearby words indicate hard searches. The correlation coefficient between dissimilarities in 2D plane and the observed data is shown. Asterisks indicate significant correlation (\*\*\*\* is  $p < 0.00005$ ).

B. Same as (A) but for nonwords.



1016 C. Same as (A) but for semantic space of words.

1017 **Neural activity corresponding to words, nonwords, and letters**

1018 For each category of stimuli i.e. words, nonwords, and letters, we averaged the activity  
1019 values across voxels and subjects within each ROI. The mean activity values are  
1020 shown in Figure S16A-E.

1021

1022 **Word vs nonword classification**

1023 For each ROI and subject, we built linear classifier to discriminate between  
1024 words and nonwords using built-in MATLAB routine “fitcdiscr”. We built separate  
1025 classifiers to distinguish the activity pattern of transposed and substituted nonwords  
1026 from their corresponding word activity patterns. The resulting decoding accuracy is  
1027 shown in Figure S16F.

1028

1029 **Can string responses be predicted from single letters?**

1030 We modelled the response of each voxel across the 64 strings (32 words, 32  
1031 nonwords) as a linear combination of the single letter activations (Figure S16G). We  
1032 evaluated model fits by comparing model correlations separately for words and  
1033 nonwords. If string responses were driven by specialized detectors for letter  
1034 combinations (such as those present in words), then we reasoned that model  
1035 correlations would be worse for words compared to nonwords. By contrast, if there are  
1036 no specialized detectors of this kind, model fits would be equivalent for words and  
1037 nonwords.

1038 We calculated cross-validated model fits by training the model on half the trials  
1039 and testing it on the other half of the trials. Since voxels could vary widely in their  
1040 reliability of responses to the stimuli, we normalized the model fit of each voxel by its  
1041 split-half reliability. The average noise-corrected model fit (averaged across voxels  
1042 and subjects) is shown in Figure S16H. This revealed no systematic difference in  
1043 model performance for words and nonwords in any of the ROIs (Figure S16H). We  
1044 obtained qualitatively similar results using a searchlight, where there were no clear  
1045 regions in which model fits differed for words and nonwords (Figure S17D).

1046 To further validate the letter model, we compared the single letter tuning along  
1047 each MDS dimension with the observed single letter tuning in each ROI (Figure S18A).  
1048 For each ROI, we grouped voxels with similar response profile and matched it to the  
1049 MDS dimension (Figure S18A). We obtained similar single letter tuning and weight  
1050 profiles for voxels across different ROIs. However this analysis is inconclusive  
1051 because there is no systematic way to compare a small set of neurons inferred from  
1052 behaviour with the much larger, possibly overcomplete set of voxel activations  
1053 observed in brain imaging. Likewise, we grouped voxels with similar summation  
1054 weights to compare the weight profiles in behaviour and brain imaging. However this  
1055 analysis is also inconclusive because different MDS-derived neurons might contribute  
1056 differently towards behaviour, so the summation weights cannot be directly averaged  
1057 to make overall comparisons between ROI activations and behaviour. Despite these  
1058 caveats, there is a general match between tuning profiles and summation weights  
1059 observed in behaviour with those observed in different brain regions.

1060

1061

1062

1063



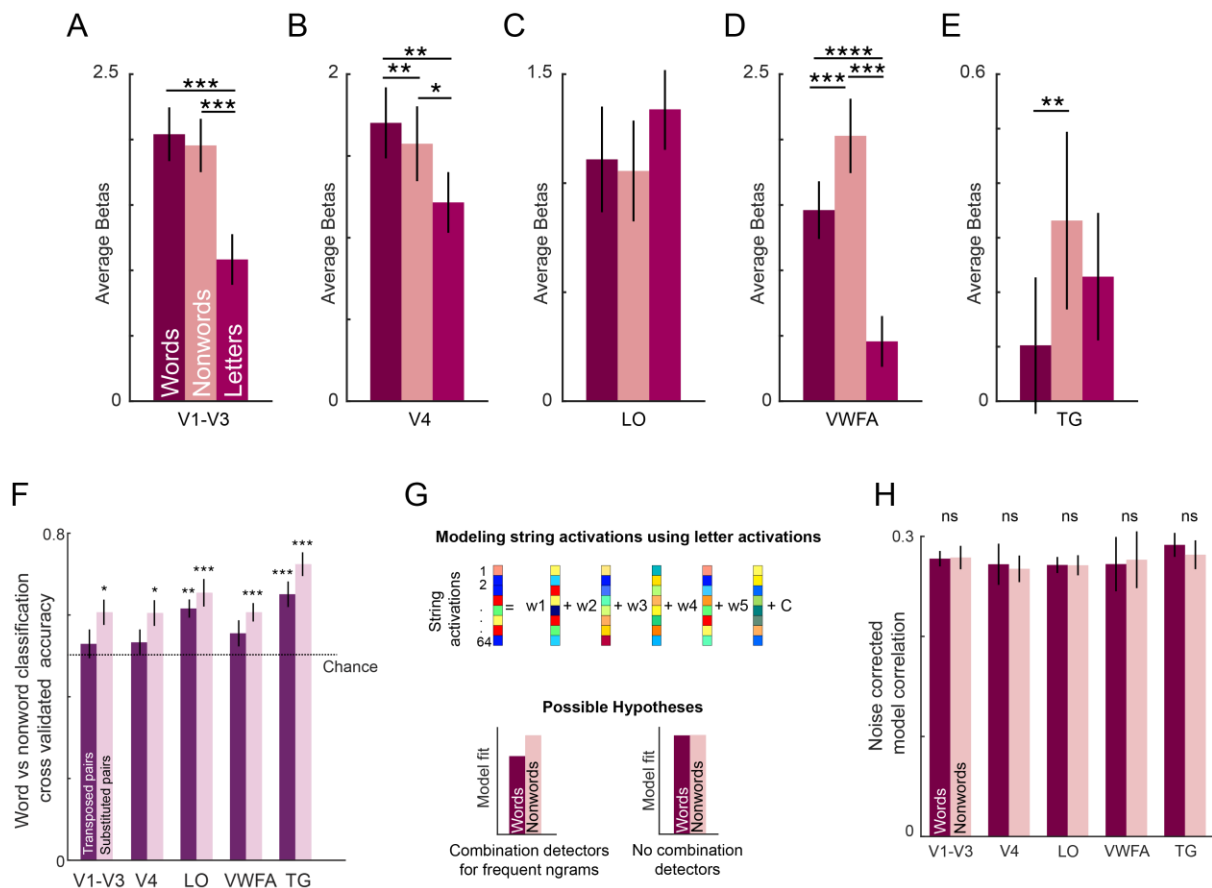

1064  
1065  
1066  
1067  
1068  
1069  
1070  
1071  
1072  
1073  
1074  
1075  
1076  
1077  
1078  
1079  
1080  
1081  
1082  
1083  
1084  
1085  
1086  
1087

### Figure S16: Neural activity

- (A) Average activation levels for words, nonwords, and letters. Error bar indicate  $\pm 1$  s.e.m. across subjects. Asterisks indicate statistical significance (\* is  $p < 0.05$ , \*\* is  $p < 0.005$ , etc. in a sign-rank test comparing subject-wise average activations).
- (B)-(E). Same as in A but for V4, Lateral Occipital areas, Visual Word Form Area, and Temporal Gyri respectively.
- (F) Cross-validated classification accuracy for transposed word-nonword pairs (*dark*) and substituted word-nonword pairs (*light*). Error bars indicate s.e.m. across subjects. Asterisks indicate statistical significance (\* is  $p < 0.05$ , \*\* is  $p < 0.005$ , etc. in a sign-rank test comparing subject-wise accuracy w.r.t. chance level).
- (G) Schematic of the voxel model. The response of each voxel across strings is modelled as a linear combination of the constituent letter responses. Bottom: Hypothetical model fits based on the presence (right) or absence (left) of local combination detectors. Predicted responses for words will deviate from the observed responses under the influence of LCD.
- (H) Average model correlation (normalized using split-half correlation) for each ROI for words (*dark*) and nonwords (*light*). Error bar indicate s.e.m. across subject.

## 1088 **Searchlight analyses**

1089 To identify other brain regions that might show the effects observed in the  
1090 individual ROIs, we performed a whole-brain searchlight analysis. Specifically, for  
1091 each voxel in a given subjects' brain, we considered a local neighbourhood of 27  
1092 voxels (3x3x3 voxels) and performed the following analyses of interest. We obtained  
1093 similar results for larger searchlight volumes. The resulting maps were smoothed using  
1094 a Gaussian filter with FWHM of 3 mm

1095

### 1096 *Searchlight for regions that match lexical decision time*

1097 For each voxel, its activity across strings is correlated with mean lexical  
1098 decision time. The resulting whole brain correlation map is averaged across subjects.  
1099 Overall, activity in VWFA, Superior Parietal Lobe (SPL), Pre-Frontal and motor cortex  
1100 is correlated with lexical decision time. This correlation map was visualized on the  
1101 brain surface (Figure S17A).

1102

### 1103 *Searchlight for regions that match perceptual space*

1104 For the neighbourhood of each voxel, we calculated the pairwise neural  
1105 dissimilarity for all word-word, nonword-nonword, and word-nonword pairs for a given  
1106 subject, and averaged this across subjects. We then calculated the correlation  
1107 between this local neural dissimilarity and the corresponding string dissimilarities  
1108 estimated using experiment 7. This correlation map was visualized on the brain  
1109 surface (Figure S17B).

1110

### 1111 *Searchlight for regions that match semantic space*

1112 For the neighbourhood of each voxel, we calculated the pairwise neural  
1113 dissimilarity for all word-word pairs for a given subject and averaged this across  
1114 subjects. We then calculated the correlation between this local neural dissimilarity and  
1115 the corresponding semantic dissimilarities. This correlation map was visualized on the  
1116 brain surface (Figure S17C).

1117

### 1118 *Searchlight for comparing linear model fits between words and nonwords*

1119 For each subject and voxel, we modelled the response to strings as a linear  
1120 combination of its single letter responses. The model fits (correlation between  
1121 observed and predicted string responses) was evaluated separately for words and  
1122 nonwords. The difference in the mean model fits between words and nonword is  
1123 visualized on the brain surface (Figure S17D).

1124

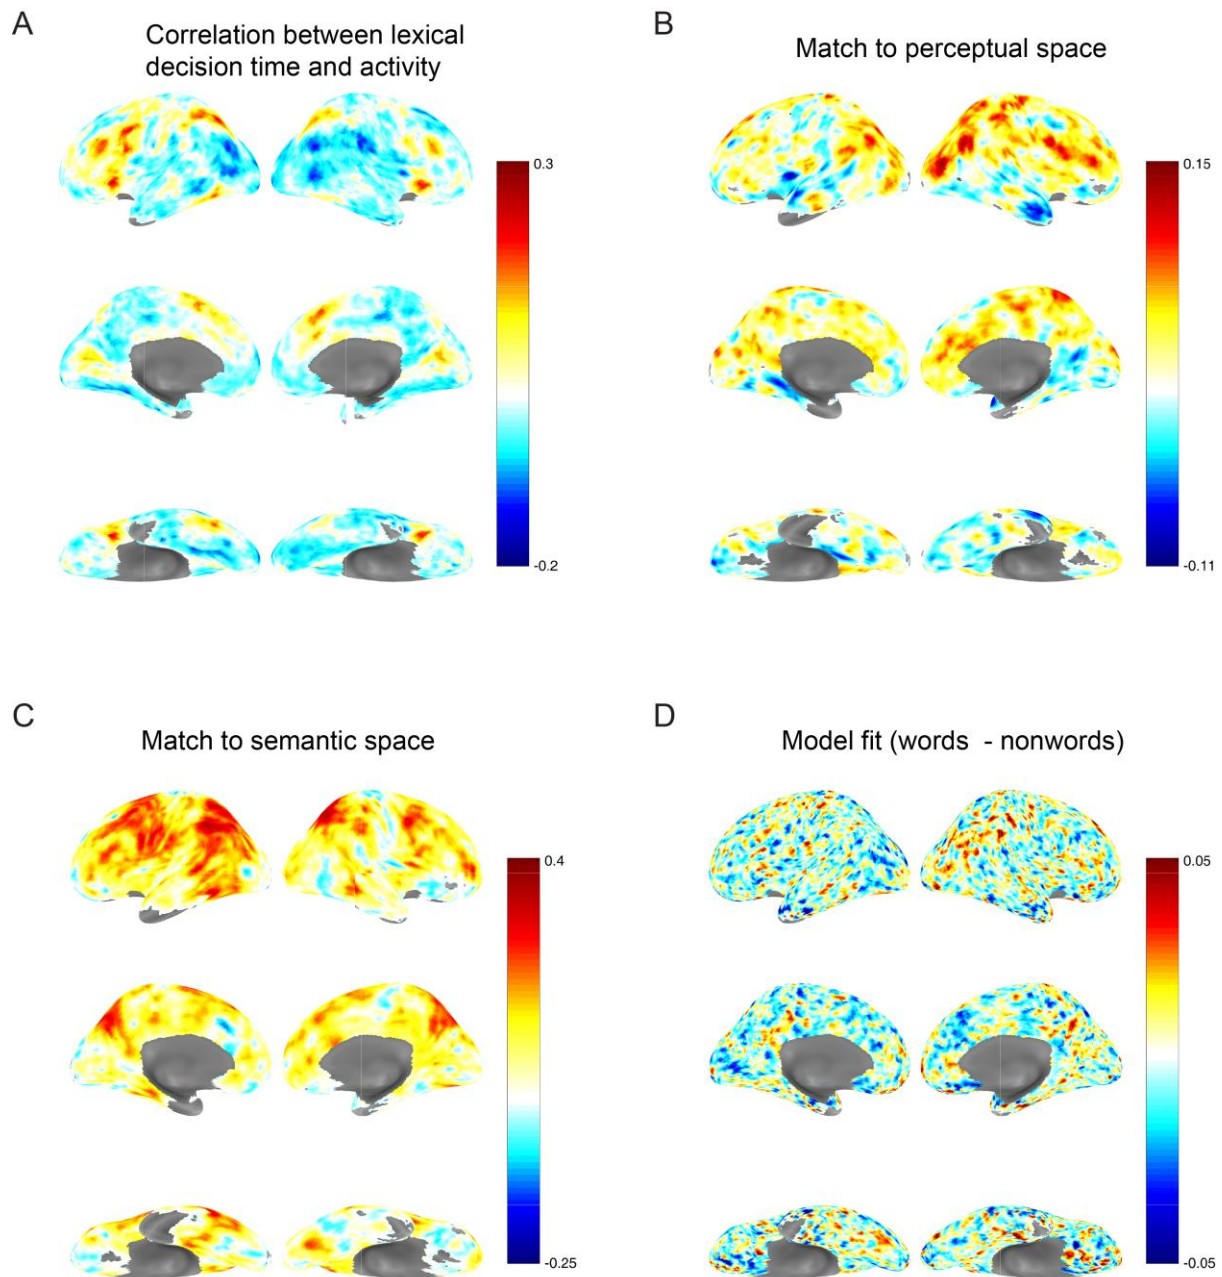

1125  
1126  
1127  
1128  
1129  
1130  
1131  
1132  
1133  
1134  
1135  
1136

**Figure S17: Searchlight analysis**

- A. Searchlight map of correlation between neural activity and lexical decision time for each voxel.
- B. Searchlight map of correlation between neural dissimilarity and search dissimilarities in behaviour.
- C. Searchlight map of correlation between neural dissimilarity and semantic dissimilarities.
- D. Searchlight map depicting the difference in model fit for words versus nonwords for each voxel, averaged across subjects.

1137 **Match between letter model and fMRI data**

1138 The letter model described throughout the study is derived from dissimilarities  
1139 measured in behaviour in two steps. First, the dissimilarities between single letters  
1140 were used to construct single neurons tuned to letter shape, whose activity predicts  
1141 these dissimilarities. Second, the summation weights of each neuron were adjusted  
1142 so that they match the dissimilarities between longer strings.

1143 Given that we recorded responses to single letters as well as strings in fMRI,  
1144 we wondered whether these can be matched in some manner to the letter tuning and  
1145 summation weights derived from behaviour in the letter model. Any direct comparison  
1146 is fraught with the difficulty that many single letter tuning functions could produce the  
1147 same behaviour. For instance, simply rotating the MDS-derived tuning functions could  
1148 yield another set of neurons that match the observed letter dissimilarities. This is  
1149 further compounded by the fact that the MDS-derived neurons contribute unequally to  
1150 behaviour, and by the fact that this mapping could change completely with increasing  
1151 numbers of neurons. Thus it is unreasonable to expect voxel tuning for single letters  
1152 or the summation weights to match exactly with the behaviourally derived tuning.

1153 Nonetheless, we attempted to find a broad link between the single letter tuning  
1154 and summation weights observed in behaviour with those observed in each ROI. The  
1155 results are summarized in Figure S18. Since there are only 10 single letters, 6 MDS  
1156 neurons were sufficient to explain > 95% of the variance of the pair-wise single letter  
1157 dissimilarities observed in Experiment 1. For each MDS neuron, we identified the  
1158 voxels whose activity for single letters had the least residual error compared to other  
1159 MDS neurons. In this manner, we sorted the voxels into six groups corresponding to  
1160 each MDS neuron. The resulting plots are shown in Figure S18A. It can be seen that  
1161 all ROIs show single letter tuning profiles similar to the behaviourally derived single  
1162 letter tuning profiles. The corresponding summation weights for these voxels are  
1163 shown in Figure S18B. Once again, it can be seen that many ROIs show similar  
1164 summation weights as those observed in behaviour.

1165

### A Letter tuning

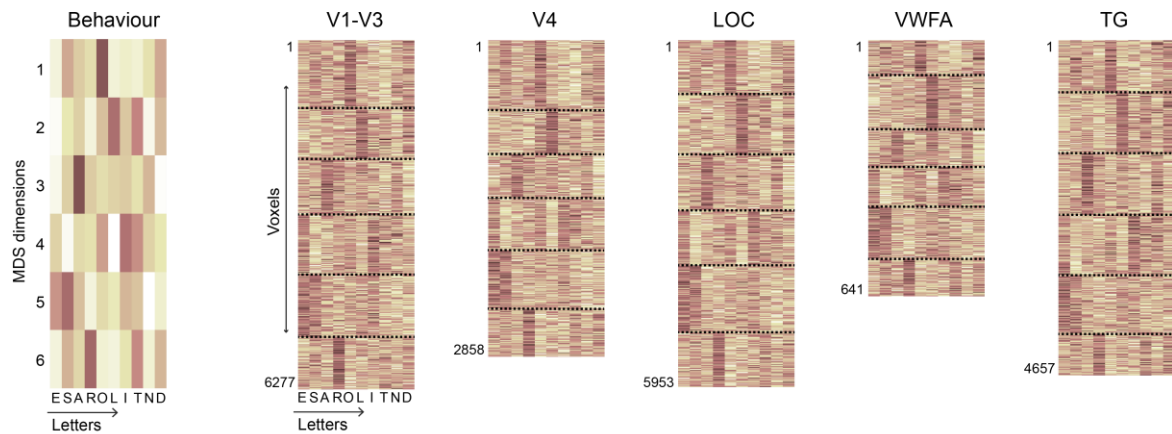

### B Summation weights

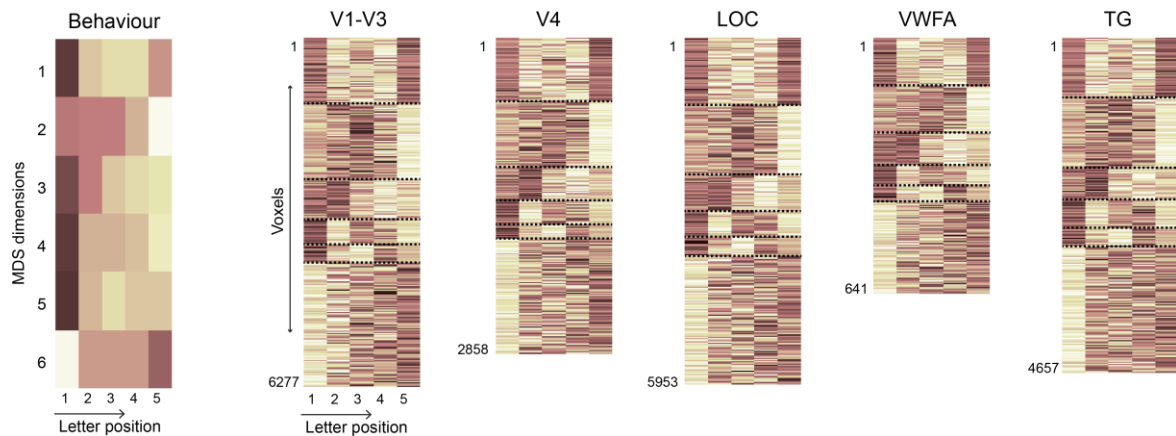

1166

1167

### Figure S18: Comparison of letter tuning and summation weights

1168

A. (Left) Response of 6 MDS neurons for all the 10 letters. (Right) Single letters response across all the voxels (concatenated across subjects) within a given ROI. Each voxels is sorted into one of 6 groups depending on which MDS neuron it matches best. The height of each ROI plot is logarithmically scaled to match the number of voxels across all subjects. Black dashed lines are used to separate the clusters corresponding to each MDS neuron.

1170

1171

1172

1173

B. Same as (A) but showing the summation weights corresponding to each MDS neuron or ROI voxel.

1174

1175

1176

1177  
1178  
1179  
1180  
1181  
1182  
1183  
1184  
1185  
1186  
1187  
1188  
1189  
1190  
1191  
1192  
1193  
1194  
1195  
1196  
1197  
1198  
1199

## SUPPLEMENTARY REFERENCES

---

- Balota DA et al. (2007) The English Lexicon Project. *Behav Res Methods* 39:445–459.
- Dehaene S, Cohen L, Sigman M, Vinckier F (2005) The neural code for written words: a proposal. *Trends Cogn Sci* 9:335–341.
- Duncan J, Humphreys GW (1989) Visual search and stimulus similarity. *Psychol Rev* 96:433–458.
- Levenshtein V (1966) Binary codes capable of correcting deletions, insertions, and reversals. *Sov Phys Dokl* 10:707–710.
- Mueller ST, Weidemann CT (2012) Alphabetic letter identification: Effects of perceivability, similarity, and bias. *Acta Psychol (Amst)* 139:19–37.
- Pennington J, Socher R, Manning CD (2014) GloVe: Global Vectors for Word Representation. In: *Empirical Methods in Natural Language Processing (EMNLP)*, pp 1532–1543.
- Pramod RT, Arun SP (2016) Object attributes combine additively in visual search. *J Vis* 16:8.
- Ratan Murty NA, Arun SP (2015) Dynamics of 3D view invariance in monkey inferotemporal cortex. *J Neurophysiol* 113:2180–2194.
- Simpson IC, Mousikou P, Montoya JM, Defior S (2013) A letter visual-similarity matrix for Latin-based alphabets. *Behav Res Methods* 45:431–439.
- Vighneshvel T, Arun SP (2013) Does linear separability really matter? Complex visual search is explained by simple search. *J Vis* 13:1–24.
